# Supplementary material for: Mutations in THAP1/DYT6 reveal that diverse dystonia genes disrupt similar neuronal pathways and functions
Source: PLoS Genet. 2018 Jan 24;14(1):e1007169. doi: 10.1371/journal.pgen.1007169 (PMC5798844; doi:10.1371/journal.pgen.1007169)
Supplement: S1 Table — (XLSX) [file pgen.1007169.s004.xlsx]

## Sheet: Canonical Pathways
Thap1+/- Striatum vs WT Striatum
Ingenuity Canonical Pathways	-log(p-value)	Ratio	Molecules
EIF2 Signaling	17.1	0.382	RPL11,RPL22,PIK3R1,RPS23,RPLP2,RPL35A,HSPA5,EIF2A,RPS11,RPS7,RPS20,RPL19,RPL21,IRS2,RPS2,PPP1CA,AGO1,RPL36AL,RPL3,RPS8,EIF4G3,RPL12,RPL37A,EIF2S2,RPL9,RPL10A,RPL15,RPS6,RPL8,EIF4A3,IRS1,RPL10,RPL6,RPS25,INSR,RPL41,RPSA,EIF3K,RPL24,Rpl36a,RPS18,RPL7A,RPL7,BCL2,RPS28,RPL27A,RPL14,RPL35,SOS1,IGF1R,PIK3R2,RPS5,RPS3,RPS17,RPS12,MAP2K1,RPL18,RPL31,RPS24,RPS19,RPL4,EIF3H,RPL17,RPL23,RPS21,FAU,EIF3G,RPL2…
mTOR Signaling	8.35	0.307	PIK3R1,RPS23,PPP2R5B,RPS11,RPS7,RHOB,RPS20,IRS2,RPS2,PRKD3,EIF4B,DDIT4,RPS8,RAC1,EIF4G3,RPS6,RPS6KA6,RND3,IRS1,EIF4A3,RPS25,PRKCH,INSR,RPSA,EIF3K,RPS18,PDGFC,RPS28,MTOR,RPTOR,RHOU,PRKCE,PPP2R2C,PIK3R2,RPS12,RHOF,RPS3,RPS5,RPS17,RPS24,RPS19,EIF3H,RPS6KA5,RPS21,FAU,PRKCG,EIF3G,DGKZ,RPS4Y1,RPS15,RRAS2,RPS26,EIF4A1,RPS27A,PRR5,RPS6KA4,PPP2R5E,RPS14
Regulation of eIF4 and p70S6K Signaling	7.2	0.313	PIK3R1,RPS18,PPP2R5B,RPS23,PAIP2,MAPK11,EIF2A,RPS11,RPS7,RPS28,MTOR,RPS20,SOS1,PPP2R2C,IRS2,RPS2,PIK3R2,RPS12,RPS17,RPS5,AGO1,RPS3,MAP2K1,ITGA4,RPS24,RPS19,EIF3H,RPS8,EIF4G3,RPS21,EIF2S2,FAU,RPS6,EIF3G,RPS4Y1,RPS15,RRAS2,RPS26,EIF4A3,IRS1,EIF4A1,RPS27A,RPS25,PPP2R5E,RPS14,RPSA,EIF3K
Dopamine-DARPP32 Feedback in cAMP Signaling	3.79	0.257	NOS1,GRIN2A,GRIN2D,PPP2R5B,PLCH2,ATP2A2,EP300,GRINA,KCNJ11,CDK5,PRKCE,PPP2R2C,PPP1CA,ADCY8,PRKD3,GUCY1B3,KCNJ12,PPP1R14C,GRIN2B,ADCY2,CACNA1D,GNAS,GUCY1A3,PPP1R1B,CREBBP,GNAI1,ADCY6,CACNA1C,PPP3CC,PLCL2,CACNA1A,PRKCG,GRIN3A,PLCB4,PRKG1,GUCY1A2,PRKCH,PPP2R5E
Granzyme A Signaling	3.64	0.636	HIST1H1C,H1FX,CREBBP,HIST1H1D,HMGB2,APEX1,EP300
Mitochondrial Dysfunction	3.18	0.241	HSD17B10,MAP2K4,SDHB,COX7B,FURIN,ATP5G1,ATP5H,Cox6c,NDUFA7,NDUFB5,TRAK1,NDUFB8,NDUFA1,NDUFB10,BCL2,NDUFA5,PARK7,GPD2,NDUFS6,ATP5J2,GPX4,COX4I1,NDUFA8,NDUFS4,AIFM1,ATP5J,SDHA,ATP5G2,BACE1,MAPK9,COX7A2L,UQCR11,NDUFA13,ATP5C1,ATP5B,NDUFB7,CAT,NDUFA12
Nitric Oxide Signaling in the Cardiovascular System	3.01	0.262	PIK3R1,SLC7A1,PDE1A,ATP2A2,PDGFC,CAV1,PRKCE,IRS2,PIK3R2,PRKD3,MAP2K1,GUCY1B3,PDE2A,CACNA1D,FLT1,GUCY1A3,RYR2,CACNA1C,CACNA1A,PRKCG,PDE1C,PRKG1,IRS1,PDE1B,GUCY1A2,PRKCH,KDR
Oxidative Phosphorylation	2.87	0.26	ATP5J,SDHA,ATP5G2,ATP5G1,COX7B,SDHB,ATP5H,Cox6c,NDUFA7,NDUFB5,COX7A2L,UQCR11,NDUFB8,NDUFA1,NDUFA13,NDUFB10,ATP5C1,NDUFA5,ATP5B,NDUFB7,NDUFS6,ATP5J2,NDUFA12,COX4I1,NDUFS4,NDUFA8
Axonal Guidance Signaling	2.84	0.197	DPYSL2,ADAMTS8,ECEL1,EPHB2,Wasl,PIK3R1,UNC5B,ARPC5,SEMA4F,ADAM11,PLCH2,ADAMTS2,WNT7B,BAIAP2,UNC5D,IRS2,ARHGEF11,CHMP1A,PRKD3,RTN4R,ITGA4,KALRN,RAC1,FZD9,DPYSL5,PPP3CC,PLCL2,HERC2,IRS1,GNAO1,RTN4,PRKCH,PAK5,UNC5A,PDGFA,SEMA6A,CRK,PLXNA2,PDGFC,ABLIM1,BCAR1,SEMA6C,EPHB6,EFNB2,CDK5,SOS1,ADAM19,PRKCE,TUBB4A,PIK3R2,RASSF5,LNPEP,SHANK2,MAP2K1,UNC5C,SEMA3E,PLXNA1,GNAS,NRP2,ADAM15,GNA12,GNAI1,SLIT2,EPHA3,…
Huntington's Disease Signaling	2.83	0.217	MAP2K4,SDHB,POLR2F,SGK1,PIK3R1,CLTB,POLR2J,HSPA5,EP300,MAP3K10,MTOR,CDK5,CPLX2,SOS1,CASQ1,IGF1R,PRKCE,IRS2,PIK3R2,PRKD3,EGFR,SDHA,CAPN5,ATP5J,GRIN2B,HDAC9,HDAC4,GRM1,HSPA9,CREBBP,MAPK9,POLR2H,HIP1,UBE2S,STX1A,SNAP25,GPAA1,PRKCG,POLR2G,HSPA8,PLCB4,ATP5B,POLR2E,CACNA1B,CAPN1,IRS1,HTT,PENK,PRKCH
Cellular Effects of Sildenafil (Viagra)	2.75	0.252	PDE1A,PLCH2,CACNG2,KCNN1,GPR37,PABPC4,KCNQ3,CACNG8,ADCY8,GUCY1B3,ADCY2,PDE2A,CACNA1D,GNAS,GUCY1A3,ADCY6,CACNA1C,PLCL2,CACNA1A,PDE1C,PLCB4,PRKG1,KCNQ2,CACNG5,PDE1B,GUCY1A2,SLC4A10
Circadian Rhythm Signaling	2.47	0.344	GRIN2B,ARNTL,GRIN2A,ADCYAP1R1,NR1D1,GRIN2D,CREBBP,PER2,GRINA,EP300,GRIN3A
GNRH Signaling	2.25	0.231	MAP2K4,RELA,MAP3K5,MAPK11,EP300,MAP3K10,SOS1,PRKCE,ADCY8,PRKD3,MAP2K1,CAMK2B,EGFR,MAP3K9,ADCY2,GNAS,CREBBP,GNAI1,RAC1,ADCY6,MAPK9,PRKCG,PLCB4,RRAS2,PAK3,PAK5,PRKCH,MAPK7
nNOS Signaling in Neurons	2.18	0.295	NOS1,CAPN5,GRIN2B,GRIN2A,GRIN2D,PPP3CC,GRINA,GRIN3A,PRKCG,CAPN1,PRKCE,PRKCH,PRKD3
GABA Receptor Signaling	2.16	0.266	GABRA5,ADCY2,AP2A1,GNAS,ABAT,ADCY6,GABBR2,KCNN1,KCNQ2,GPR37,GABRG1,GAD1,KCNQ3,GABRD,ADCY8,GABRA1,GABRA3
Neuropathic Pain Signaling In Dorsal Horn Neurons	2.12	0.234	GRIN2A,GRM2,CAMK1,CAMK1D,PIK3R1,GRIN2D,PLCH2,GRINA,KCNN1,GPR37,PRKCE,IRS2,KCNQ3,PIK3R2,PRKD3,CAMK2B,GRIN2B,GRM1,PLCL2,PRKCG,GRIN3A,PLCB4,KCNQ2,IRS1,PRKCH
Reelin Signaling in Neurons	2.09	0.244	MAP2K4,APOE,MAP3K9,ARHGEF4,PIK3R1,MAPK8IP2,MAPK9,VLDLR,MAPK8IP1,MAP3K10,CDK5,NDEL1,MAPT,IRS1,IRS2,LRP8,ARHGEF11,PIK3R2,ARHGEF9,DCX,ITGA4
Netrin Signaling	2.03	0.306	PRKG1,UNC5A,RYR2,UNC5B,UNC5D,RAC1,NFATC2,PPP3CC,ABLIM1,ENAH,UNC5C
Synaptic Long Term Depression	2	0.222	NOS1,GRM2,PPP2R5B,PLCH2,IGF1R,PRKCE,PPP2R2C,PRKD3,MAP2K1,GUCY1B3,PLA2G16,GNAS,GUCY1A3,ABHD3,GRM1,GNA12,RYR2,GNAI1,PLA2G3,PLCL2,PRKCG,PLCB4,PRKG1,RRAS2,GNAO1,GUCY1A2,PRKCH,PPP2R5E
Calcium Signaling	1.97	0.213	RAP2A,GRIN2A,CAMK1,CAMK1D,GRIN2D,TRPC5,ATP2A2,TRPC3,GRINA,EP300,TRPV6,CASQ1,CHRNA7,CHRNA5,CASQ2,CAMK2B,AKAP5,GRIN2B,HDAC9,CALR,HDAC4,CHRNA4,CREBBP,RYR2,SLC8A2,PPP3CC,ATP2B2,GRIN3A,MICU1,Tpm4,ATP2B3,NFATC2,SLC8A1
Cardiac β-adrenergic Signaling	1.96	0.22	PPP2R5B,PDE1A,ATP2A2,PDE7B,PPP2R2C,PPP1CA,ADCY8,APEX1,SMPDL3A,AKAP5,PPP1R14C,PDE2A,ADCY2,CACNA1D,GNAS,PDE9A,PDE10A,RYR2,ADCY6,CACNA1C,SLC8A2,CACNA1A,PDE1C,AKAP13,PDE1B,PPP2R5E,SLC8A1,AKAP1
UVB-Induced MAPK Signaling	1.94	0.258	MAP2K4,PIK3R1,MAPK9,RPS6KA5,MAPK11,PRKCG,MTOR,H3F3A/H3F3B,IRS1,PRKCE,PRKCH,IRS2,PIK3R2,MAP2K1,PRKD3,EGFR
Gap Junction Signaling	1.86	0.211	DBN1,PIK3R1,PLCH2,SOS1,CAV1,PRKCE,IRS2,TUBB4A,PIK3R2,ADCY8,PRKD3,MAP2K1,GUCY1B3,HTR2A,EGFR,ADCY2,GNAS,GUCY1A3,ADCY6,GNAI1,PLCL2,PPP3CC,PRKCG,PLCB4,PRKG1,RRAS2,NOV,IRS1,GUCY1A2,PRKCH,MAPK7,MAP2K5
B Cell Receptor Signaling	1.85	0.207	MAP2K4,RAP2A,GAB2,RELA,PIK3R1,NFKBIE,GSK3A,MAP3K5,BCL6,MAPK11,EP300,MAP3K10,MTOR,INPP5B,SOS1,IRS2,RASSF5,PIK3R2,MAP2K1,CAMK2B,VAV2,MAP3K9,CSK,CREBBP,RAC1,MAPK9,PPP3CC,SYNJ2,EBF1,RRAS2,INPP5F,IRS1,PAG1,NFATC2
G-Protein Coupled Receptor Signaling	1.82	0.192	ADRA2B,PIK3R1,LAMTOR3,HRH1,PDE7B,RGS10,IRS2,APEX1,SMPDL3A,PDE2A,GRM1,PDE10A,SSTR3,CREBBP,RGS4,PDE1C,ADRA2A,IRS1,PDE1B,GNAO1,RELA,GRM2,NFKBIE,PDE1A,CHRM3,AVPR1A,EP300,SYNGAP1,SOS1,PRKCE,PIK3R2,ADCY8,MAP2K1,CAMK2B,HTR2A,ADCY2,RGS2,GNAS,NPY1R,PDE9A,GNAI1,ADCY6,PRKCG,GABBR2,PLCB4,RRAS2,PTH1R,ADRA2C,HTR1A,ADORA2A
Molecular Mechanisms of Cancer	1.79	0.184	MAP2K4,RAPGEF1,GAB2,PIK3R1,GSK3A,LAMTOR3,RB1,RASGRF1,BBC3,RHOB,WNT7B,IRS2,ARHGEF11,HIPK2,SMAD1,PRKD3,ITGA4,ARHGEF4,RALB,CREBBP,RAC1,FZD9,CCND2,RND3,IRS1,GNAO1,PRKCH,PAK5,ARHGEF9,NOTCH1,RELA,RAP2A,NFKBIE,CDK4,CRK,MAP3K5,MAPK11,BCL2,EP300,SYNGAP1,CDK5,SOS1,TGFB2,RHOU,PRKCE,PIK3R2,ADCY8,RHOF,MAP2K1,CAMK2B,ADCY2,LRP5,GNAS,HAT1,GNA12,ADCY6,GNAI1,MAPK9,PRKCG,PLCB4,RRAS2,PAK3,BMP6,LRP1,BIRC2
Nucleotide Excision Repair Pathway	1.77	0.294	POLR2G,POLR2F,GTF2H4,POLR2E,ERCC3,POLR2J,POLR2H,MNAT1,XPA,RPA2
Ephrin Receptor Signaling	1.77	0.205	RAPGEF1,GRIN2A,EPHB2,PDGFA,GRIN2D,Wasl,ARPC5,ACP1,CRK,BCAR1,PDGFC,GRINA,EP300,EPHB6,EFNB2,SOS1,MAP2K1,ITGA4,GRIN2B,GNAS,KALRN,ANGPT1,GNA12,CREBBP,RAC1,GNAI1,EPHA3,GRIN3A,RRAS2,PAK3,GNAO1,EPHA5,EPHB3,PAK5
Melanocyte Development and Pigmentation Signaling	1.76	0.228	ADCY2,GNAS,SOX10,PIK3R1,CREBBP,ADCY6,RPS6KA5,CRK,EP300,BCL2,RPS6KA6,RRAS2,IRS1,SOS1,SH2B2,KIT,RPS6KA4,IRS2,PIK3R2,ADCY8,MAP2K1
Superoxide Radicals Degradation	1.75	0.5	CAT,NQO1,CYGB,SOD1
Estrogen Receptor Signaling	1.72	0.215	POLR2F,POLR2J,MNAT1,PGR,EP300,DDX5,NCOA2,MED15,MED10,CTBP2,SOS1,MAP2K1,CREBBP,POLR2H,GTF2F1,NCOA3,POLR2G,H3F3A/H3F3B,RRAS2,GTF2H4,POLR2E,ERCC3,TRRAP,SPEN,NRIP1,MED13L
Neuregulin Signaling	1.7	0.232	PIK3R1,CRK,PRKCG,RPS6,MTOR,RRAS2,PICK1,CDK5,NRG3,SOS1,PRKCE,PRKCH,PIK3R2,STAT5B,MAP2K1,PRKD3,EGFR,ITGA4,MATK
Synaptic Long Term Potentiation	1.7	0.218	GRIN2B,PPP1R14C,GRIN2A,GRM2,GRM1,GRIN2D,CREBBP,CACNA1C,PPP3CC,PLCL2,PLCH2,GRINA,PRKCG,EP300,GRIN3A,PLCB4,RRAS2,PRKCE,PRKCH,ADCY8,PPP1CA,MAP2K1,PRKD3,CAMK2B
Semaphorin Signaling in Neurons	1.69	0.26	DPYSL2,CRMP1,PLXNA1,SEMA4D,CDK5,RND3,PAK3,RHOB,RAC1,RHOU,PAK5,DPYSL5,RHOF
Palmitate Biosynthesis I (Animals)	1.69	1	OXSM,FASN
Fatty Acid Biosynthesis Initiation II	1.69	1	OXSM,FASN
STAT3 Pathway	1.65	0.236	MAP2K4,MAP3K9,FLT1,RAC1,MAPK9,MAP3K21,MAPK11,NDUFA13,BCL2,MAP3K10,RRAS2,IGF1R,INSR,SOCS7,KDR,MAP2K1,EGFR
Glutamate Degradation III (via 4-aminobutyrate)	1.64	0.6	SUCLG2,ABAT,GAD1
Amyotrophic Lateral Sclerosis Signaling	1.62	0.217	NOS1,CAPN5,GRIN2B,GRIN2A,CACNA1D,PIK3R1,GRIN2D,GPX1,RAC1,CACNA1C,SOD1,PDGFC,CACNA1A,BCL2,GRINA,GRIN3A,IRS1,CAPN1,CAT,IRS2,PIK3R2,SSR4,BIRC2
RAR Activation	1.59	0.199	MAP2K4,RELA,PIK3R1,MAP3K5,MNAT1,RPL7A,RARG,MAPK11,RBP1,EP300,NR2F1,PNRC1,RARB,TGFB2,PRKCE,PIK3R2,ADCY8,STAT5B,MAP2K1,SMAD1,PRKD3,ADCY2,CSK,CREBBP,ADCY6,RAC1,MAPK9,CRABP1,PRKCG,GTF2H4,ERCC3,PRKCH,NRIP1,SCAND1
Androgen Signaling	1.58	0.215	RELA,CALR,POLR2F,GNAS,GNA12,CREBBP,POLR2J,GNAI1,POLR2H,GTF2F1,MNAT1,EP300,PRKCG,POLR2G,TGFB1I1,NCOA2,GTF2H4,POLR2E,ERCC3,GNAO1,PRKCE,PRKCH,PRKD3
Glioma Signaling	1.49	0.211	RBL2,CAMK1,CAMK1D,PDGFA,PIK3R1,CDK4,PDGFC,PRKCG,RB1,MTOR,RRAS2,IRS1,SOS1,IGF1R,PRKCE,IRS2,IDH2,PRKCH,PIK3R2,MAP2K1,PRKD3,CAMK2B,EGFR
Production of Nitric Oxide and Reactive Oxygen Species in Macrophages	1.49	0.196	MAP2K4,APOE,RELA,PIK3R1,NFKBIE,PPP2R5B,MAP3K5,MAPK11,MAP3K10,RHOB,CYBA,RHOU,PRKCE,IRS2,PPP2R2C,PIK3R2,RHOF,PPP1CA,MAP2K1,PRKD3,PPP1R14C,MAP3K9,CREBBP,IFNGR2,RAC1,MAPK9,PRKCG,RND3,IRS1,CAT,PRKCH,PPP2R5E,CLU
Cholecystokinin/Gastrin-mediated Signaling	1.48	0.217	MAP2K4,GNA12,MAPK9,BCAR1,PRKCG,PLCB4,RRAS2,RHOB,RND3,SOS1,RHOU,PRKCE,SST,PRKCH,MAPK7,RHOF,MAP2K1,PRKD3,MAP2K5,EGFR
CREB Signaling in Neurons	1.46	0.194	GRM2,GRIN2A,POLR2F,PIK3R1,GRIN2D,POLR2J,PLCH2,EP300,SOS1,PRKCE,IRS2,PIK3R2,ADCY8,MAP2K1,PRKD3,CAMK2B,GRIN2B,ADCY2,GNAS,GRM1,GNA12,CREBBP,ADCY6,GNAI1,POLR2H,PLCL2,PRKCG,POLR2G,PLCB4,RRAS2,POLR2E,IRS1,GNAO1,PRKCH
cAMP-mediated signaling	1.44	0.189	ADRA2B,GRM2,CAMK1,CAMK1D,PDE1A,CHRM3,EP300,LAMTOR3,PDE7B,RGS10,ADCY8,APEX1,MAP2K1,CAMK2B,SMPDL3A,AKAP5,RGS2,PDE2A,ADCY2,GNAS,PDE10A,NPY1R,PDE9A,SSTR3,CREBBP,GNAI1,ADCY6,RGS4,PPP3CC,PDE1C,GABBR2,AKAP13,ADRA2A,GNAO1,PTH1R,PDE1B,HTR1A,ADRA2C,ADORA2A,AKAP1
Sumoylation Pathway	1.44	0.215	MAP2K4,SUMO3,CREBBP,MAPK9,MAP3K5,ZEB1,UBA2,ARHGDIB,EP300,RNF4,SAE1,RFC4,RND3,RHOB,SUMO1,CTBP2,RHOU,SUMO2,RHOF,RFC3
p70S6K Signaling	1.44	0.205	YWHAG,EEF2,PIK3R1,PPP2R5B,GNAI1,PLCL2,PLCH2,PRKCG,RPS6,PLCB4,MTOR,RRAS2,MAPT,IRS1,SOS1,PRKCE,PPP2R2C,IRS2,PRKCH,PIK3R2,EEF2K,PPP2R5E,MAP2K1,PRKD3,EGFR
Melatonin Signaling	1.43	0.231	MAP2K4,GNAI1,PLCL2,PLCH2,PRKCG,PLCB4,RORA,GNAO1,PRKCE,PRKCH,PRKD3,MAP2K1,MAP2K5,RORB,CAMK2B
Xenobiotic Metabolism Signaling	1.43	0.186	MAP2K4,NDST3,RELA,CAMK1,CAMK1D,PIK3R1,PPP2R5B,MAP3K5,MAPK11,EP300,HS6ST1,MAP3K10,ALDH1L1,SUMO1,PRKCE,PPP2R2C,IRS2,PIK3R2,MAP2K1,PRKD3,AHR,CAMK2B,MAP3K9,MGST1,HDAC4,NQO1,CREBBP,MAPK9,GRIP1,CHST12,PRKCG,RRAS2,IRS1,CAT,HS3ST2,PRKCH,MAPK7,NRIP1,PPP2R5E,MAP2K5,DNAJC7,SCAND1,MGST3
Endothelin-1 Signaling	1.42	0.195	NOS1,PIK3R1,SHC3,PLCH2,MAPK11,SOS1,CASQ1,PRKCE,IRS2,PIK3R2,ADCY8,PRKD3,GUCY1B3,PLA2G16,ADCY2,GNAS,GUCY1A3,ABHD3,GNA12,ADCY6,GNAI1,PLA2G3,MAPK9,PLCL2,PRKCG,PLCB4,RRAS2,IRS1,GNAO1,GUCY1A2,PRKCH,MAPK7
NRF2-mediated Oxidative Stress Response	1.4	0.192	MAP2K4,PIK3R1,DNAJC6,DNAJC10,MAP3K5,CLPP,EP300,SCARB1,DNAJC8,PRKCE,IRS2,JUND,GCLM,PIK3R2,PRKD3,MAP2K1,MGST1,DNAJC9,CREBBP,DNAJC19,NQO1,MAPK9,SOD1,DNAJB14,PRKCG,ERP29,RRAS2,IRS1,CAT,PRKCH,MAPK7,MAP2K5,DNAJC7,MGST3
CXCR4 Signaling	1.39	0.196	MAP2K4,PIK3R1,CRK,BCAR1,RHOB,RHOU,PRKCE,IRS2,ARHGEF11,PIK3R2,RHOF,ADCY8,MAP2K1,PRKD3,ADCY2,GNAS,GNA12,GNAI1,RAC1,ADCY6,MAPK9,PRKCG,PLCB4,RRAS2,RND3,PAK3,IRS1,GNAO1,PAK5,PRKCH
Oleate Biosynthesis II (Animals)	1.37	0.4	SCD,UFSP2,Scd2,FADS1
Role of NFAT in Cardiac Hypertrophy	1.31	0.189	MAP2K4,CAMK1,CAMK1D,PIK3R1,PLCH2,MAPK11,EP300,SOS1,IGF1R,TGFB2,PRKCE,IRS2,PIK3R2,ADCY8,MAP2K1,PRKD3,CAMK2B,AKAP5,HDAC9,ADCY2,HDAC4,GNAS,ADCY6,GNAI1,MAPK9,SLC8A2,PPP3CC,PLCL2,PRKCG,PLCB4,RRAS2,IRS1,PRKCH,SLC8A1
Aldosterone Signaling in Epithelial Cells	1.29	0.193	CRYAB,ASIC2,SGK1,PIK3R1,DNAJC6,DNAJC10,PLCH2,HSPA5,DNAJC8,SOS1,HSPE1,PRKCE,IRS2,PIK3R2,PRKD3,MAP2K1,DNAJC9,DNAJC19,HSPA9,PLCL2,DNAJB14,PRKCG,HSPA8,PLCB4,PIP5K1C,IRS1,PRKCH,PIP4K2C,DNAJC7
tRNA Splicing	1.28	0.257	SMPDL3A,PDE2A,PDE7B,PDE9A,PDE10A,PDE1B,PDE1A,APEX1,PDE1C
Trehalose Degradation II (Trehalase)	1.26	0.667	HK1,HK2
Glycerol-3-phosphate Shuttle	1.26	0.667	GPD1L,GPD2
Oxidized GTP and dGTP Detoxification	1.26	0.667	DDX6,RUVBL2
4-aminobutyrate Degradation I	1.26	0.667	SUCLG2,ABAT
Cardiac Hypertrophy Signaling	1.25	0.183	MAP2K4,ADRA2B,PIK3R1,MAP3K5,PLCH2,MAPK11,EP300,MAP3K10,MTOR,RHOB,SOS1,TGFB2,RHOU,IGF1R,IRS2,PIK3R2,RHOF,ADCY8,MAP2K1,MAP3K9,ADCY2,CACNA1D,GNAS,GNA12,CREBBP,GNAI1,ADCY6,MAPK9,CACNA1C,PPP3CC,PLCL2,CACNA1A,PLCB4,RRAS2,ADRA2A,RND3,IRS1,GNAO1,ADRA2C
Purine Nucleotides De Novo Biosynthesis II	1.23	0.364	GMPS,IMPDH2,IMPDH1,PFAS
Relaxin Signaling	1.23	0.193	RELA,PIK3R1,NFKBIE,PDE1A,PDE7B,IRS2,PIK3R2,ADCY8,APEX1,MAP2K1,GUCY1B3,SMPDL3A,ADCY2,PDE2A,GNAS,GUCY1A3,PDE9A,PDE10A,GNA12,GNAI1,ADCY6,PDE1C,IRS1,GNAO1,PDE1B,GUCY1A2,MMP9
Type II Diabetes Mellitus Signaling	1.22	0.198	MAP2K4,RELA,PKLR,SLC27A2,NFKBIE,PIK3R1,PKM,MAPK9,MAP3K5,KCNJ11,PRKCG,MTOR,IRS1,SH2B2,ABCC8,PRKCE,ACSL4,IRS2,PRKCH,PIK3R2,INSR,SOCS7,PRKD3
Thrombin Signaling	1.22	0.186	RELA,CAMK1,CAMK1D,PIK3R1,PLCH2,MAPK11,RHOB,SOS1,RHOU,PRKCE,IRS2,ARHGEF11,PIK3R2,ADCY8,RHOF,MAP2K1,PRKD3,CAMK2B,EGFR,ARHGEF4,ADCY2,GNAS,GNA12,GNAI1,ADCY6,PLCL2,PRKCG,PLCB4,RRAS2,RND3,IRS1,GNAO1,PRKCH,ARHGEF9
Cell Cycle Control of Chromosomal Replication	1.21	0.25	MCM5,PRIM1,CDK5,POLA1,ORC5,ORC6,CDK4,TOP2A,RPA2
CNTF Signaling	1.21	0.224	LIFR,MTOR,RPS6KA6,RRAS2,IRS1,PIK3R1,SOS1,CNTFR,RPS6KA4,IRS2,RPS6KA5,PIK3R2,MAP2K1
FLT3 Signaling in Hematopoietic Progenitor Cells	1.21	0.21	GAB2,PIK3R1,CREBBP,RPS6KA5,MAPK11,EP300,RPS6KA6,MTOR,RRAS2,IRS1,SOS1,RPS6KA4,IRS2,STAT2,PIK3R2,STAT5B,MAP2K1
ErbB Signaling	1.2	0.204	MAP2K4,PIK3R1,MAPK9,MAPK11,PRKCG,MTOR,RRAS2,PAK3,NRG3,IRS1,SOS1,PRKCE,IRS2,PAK5,PRKCH,PIK3R2,MAP2K1,PRKD3,EGFR
Sphingosine-1-phosphate Signaling	1.19	0.198	ADCY2,S1PR5,PDGFA,PIK3R1,ACER2,GNA12,ADCY6,RAC1,GNAI1,PLCL2,PLCH2,PDGFC,PLCB4,RND3,RHOB,IRS1,CASQ1,RHOU,IRS2,PIK3R2,ADCY8,RHOF
UVC-Induced MAPK Signaling	1.18	0.238	MAP2K4,RRAS2,PRKCE,MAPK9,PRKCH,PRKD3,MAP2K1,MAPK11,PRKCG,EGFR
Salvage Pathways of Pyrimidine Ribonucleotides	1.13	0.205	MAP2K4,MAP3K9,DMPK,NME5,SGK1,CDK4,MAPK9,NME3,AK5,PAK3,CDK5,PRKCE,PAK5,PRKCH,MAPK7,MAP2K1,UCKL1
Inhibition of Angiogenesis by TSP1	1.12	0.25	MAP2K4,GUCY1A3,GUCY1A2,MAPK9,KDR,MAPK11,MMP9,GUCY1B3
CDK5 Signaling	1.12	0.2	PPP1R14C,ADCY2,GNAS,PPP1R1B,PPP2R5B,ADCY6,MAPK9,MAPK11,CACNA1A,RRAS2,CDK5,MAPT,CAPN1,PPP2R2C,MAPK7,PPP2R5E,ADCY8,PPP1CA,MAP2K1
FAK Signaling	1.12	0.2	CAPN5,PIK3R1,CSK,RAC1,CRK,BCAR1,GIT2,RRAS2,PAK3,CAPN1,IRS1,SOS1,IRS2,PAK5,PIK3R2,VCL,MAP2K1,EGFR,ITGA4
PAK Signaling	1.12	0.2	MAP2K4,PDGFA,PIK3R1,PAK1IP1,RAC1,MAPK9,EPHA3,PDGFC,GIT1,RRAS2,PAK3,IRS1,SOS1,EPHB3,IRS2,PAK5,PIK3R2,MAP2K1,ITGA4
Insulin Receptor Signaling	1.09	0.189	PPP1R14C,RAPGEF1,ASIC2,SGK1,PIK3R1,LIPE,GSK3A,CRK,VAMP2,PTPRF,GRB10,SYNJ2,MTOR,RRAS2,INPP5F,IRS1,INPP5B,SOS1,SH2B2,RPTOR,IRS2,PIK3R2,INSR,PPP1CA,MAP2K1
IL-3 Signaling	1.09	0.205	GAB2,RAPGEF1,PIK3R1,RAC1,PPP3CC,PRKCG,RRAS2,IRS1,SOS1,PRKCE,PRKCH,IRS2,PIK3R2,STAT5B,MAP2K1,PRKD3
LPS-stimulated MAPK Signaling	1.09	0.202	MAP2K4,RELA,NFKBIE,PIK3R1,RAC1,MAPK9,MAP3K5,MAPK11,PRKCG,RRAS2,IRS1,PRKCE,IRS2,PRKCH,PIK3R2,MAP2K1,PRKD3
Sperm Motility	1.08	0.196	PLA2G16,CACNA1G,PDE2A,GNAS,GUCY1A3,ABHD3,PLA2G3,PLCL2,PDE1A,PLCH2,PRKCG,PDE1C,PLCB4,PRKG1,PDE1B,GUCY1A2,PRKCE,PRKCH,PRKD3,GUCY1B3
Pyridoxal 5'-phosphate Salvage Pathway	1.07	0.213	MAP2K4,MAP3K9,DMPK,PAK3,CDK5,SGK1,CDK4,PRKCE,MAPK9,PAK5,PRKCH,MAPK7,MAP2K1
Corticotropin Releasing Hormone Signaling	1.05	0.194	NOS1,ADCY2,GNAS,GUCY1A3,CREBBP,ARPC5,ADCY6,GNAI1,MAPK11,EP300,PRKCG,GNAO1,GUCY1A2,PRKCE,JUND,PRKCH,ADCY8,MAP2K1,PRKD3,GUCY1B3
Unfolded protein response	1.04	0.22	HSPA8,CALR,ERN1,EDEM1,HSPA9,CD82,MAP3K5,HSPA5,EIF2A,CEBPG,BCL2
Embryonic Stem Cell Differentiation into Cardiac Lineages	1.03	0.375	SOX2,ISL1,SP4
RhoGDI Signaling	1.03	0.182	ARPC5,EP300,RHOB,RHOU,ARHGAP12,ARHGEF11,RHOF,DLC1,ITGA4,ARHGEF4,CDH4,GNAS,GNA12,CREBBP,GNAI1,RAC1,CDH6,GRIP1,ARHGDIB,DGKZ,CDH9,PAK3,RND3,PIP5K1C,CDH10,GNAO1,PAK5,ARHGEF9,PIP4K2C
Renin-Angiotensin Signaling	1.02	0.19	MAP2K4,RELA,ADCY2,PIK3R1,ADCY6,RAC1,SHC3,MAPK9,MAPK11,PRKCG,RRAS2,PAK3,IRS1,SOS1,PRKCE,IRS2,PAK5,PRKCH,PIK3R2,ADCY8,MAP2K1,PRKD3
Molybdenum Cofactor Biosynthesis	1	0.5	NFS1,MOCS3
Glutathione Redox Reactions I	0.994	0.278	GPX3,MGST1,GPX1,GPX4,MGST3
PI3K/AKT Signaling	0.991	0.188	RELA,GAB2,YWHAG,NFKBIE,PIK3R1,PPP2R5B,GSK3A,MAP3K5,MAPK8IP1,BCL2,SYNJ2,MTOR,RRAS2,INPP5F,INPP5B,SOS1,PPP2R2C,PIK3R2,PPP2R5E,MAP2K1,ITGA4,THEM4
Glutamate Receptor Signaling	0.986	0.211	GRIN2B,GRM2,GRIN2A,SLC1A6,PICK1,HOMER2,SLC17A7,GRM1,GRIN2D,GRIP1,GRINA,GRIN3A
eNOS Signaling	0.984	0.183	PIK3R1,SLC7A1,HSPA5,PDGFC,CAV1,PRKCE,IRS2,PIK3R2,ADCY8,CHRNA5,PRKD3,GUCY1B3,ADCY2,CHRNA4,GNAS,GUCY1A3,FLT1,HSPA9,ADCY6,PRKCG,HSPA8,PRKG1,IRS1,GUCY1A2,PRKCH,KDR
Protein Kinase A Signaling	0.975	0.168	ACP1,LIPE,GSK3A,DUSP15,PLCH2,PDE7B,PTPRO,PPP1CA,PRKD3,APEX1,SMPDL3A,PPP1R14C,PTPRE,PDE2A,PTPRG,YWHAG,PDE10A,PPP1R1B,CREBBP,PLCL2,PPP3CC,PTPRM,PDE1C,AKAP13,H3F3A/H3F3B,PDE1B,PTPRS,HIST1H1D,PRKCH,HIST1H1C,RELA,PTPN9,NFKBIE,UBASH3B,PDE1A,PTPRF,EP300,H1FX,TGFB2,PRKCE,ADCY8,MAP2K1,PTPRN,CAMK2B,AKAP5,ADCY2,GNAS,PDE9A,RYR2,ADCY6,GNAI1,PRKCG,PLCB4,NFATC2,CDC26,AKAP1
NGF Signaling	0.956	0.188	MAP2K4,RELA,MAP3K9,PIK3R1,CREBBP,RAC1,MAPK9,RPS6KA5,CRK,MAP3K5,EP300,MAP3K10,RPS6KA6,RRAS2,IRS1,SOS1,RPS6KA4,IRS2,PIK3R2,MAPK7,MAP2K1
Fc Epsilon RI Signaling	0.951	0.189	VAV2,MAP2K4,PIK3R1,RAC1,PLA2G3,MAPK9,MAPK11,PRKCG,SYNJ2,RRAS2,INPP5F,IRS1,INPP5B,SOS1,PRKCE,IRS2,PRKCH,PIK3R2,MAP2K1,PRKD3
Natural Killer Cell Signaling	0.943	0.191	VAV2,PIK3R1,RAC1,PRKCG,SYNJ2,RRAS2,PAK3,INPP5F,INPP5B,IRS1,SOS1,PRKCE,IRS2,PAK5,PRKCH,PIK3R2,MAP2K1,PRKD3
Thrombopoietin Signaling	0.939	0.203	GAB2,PIK3R1,PRKCG,RRAS2,IRS1,SOS1,PRKCE,PRKCH,IRS2,PIK3R2,STAT5B,MAP2K1,PRKD3
Maturity Onset Diabetes of Young (MODY) Signaling	0.913	0.263	CACNA1D,PKLR,CACNA1C,INSR,CACNA1A
Gαq Signaling	0.912	0.179	RELA,PIK3R1,NFKBIE,AVPR1A,CHRM3,HRH1,RHOB,RHOU,PRKCE,IRS2,PIK3R2,RHOF,MAP2K1,PRKD3,HTR2A,RGS2,GNAS,GRM1,CSK,RGS4,PPP3CC,PRKCG,PLCB4,RND3,IRS1,NFATC2,PRKCH
CD27 Signaling in Lymphocytes	0.911	0.213	MAP2K4,MAP3K9,MAP3K10,RELA,SIVA1,NFKBIE,MAPK9,MAP3K5,MAP2K1,MAP2K5
4-1BB Signaling in T Lymphocytes	0.905	0.233	MAP2K4,RELA,NFKBIE,MAPK9,MAP3K5,MAP2K1,MAPK11
Calcium Transport I	0.903	0.333	ATP2B3,ATP2A2,ATP2B2
Erythropoietin Signaling	0.901	0.195	RELA,EPOR,NFKBIE,PIK3R1,PRKCG,RRAS2,IRS1,SOS1,PRKCE,PRKCH,IRS2,PIK3R2,STAT5B,MAP2K1,PRKD3
Estrogen-Dependent Breast Cancer Signaling	0.899	0.197	HSD17B10,RELA,PIK3R1,CREBBP,HSD17B7,HSD17B11,EP300,RRAS2,IRS1,IGF1R,IRS2,PIK3R2,STAT5B,EGFR
Agrin Interactions at Neuromuscular Junction	0.899	0.2	MAP2K4,PKLR,RAC1,MAPK9,RRAS2,PAK3,NRG3,UTRN,PAK5,AGRN,CTTN,EGFR,ITGA4
PPAR Signaling	0.87	0.19	RELA,IL1RAPL2,PDGFA,NFKBIE,CREBBP,PDGFC,EP300,NR2F1,RRAS2,SOS1,NRIP1,IL1RAPL1,INSR,STAT5B,MAP2K1,SCAND1
PTEN Signaling	0.868	0.183	RELA,FLT1,PIK3R1,RAC1,GSK3A,FOXG1,BCAR1,BCL2,SYNJ2,RRAS2,INPP5F,INPP5B,SOS1,IGF1R,PIK3R2,INSR,KDR,MAGI2,MAP2K1,EGFR,ITGA4
Actin Nucleation by ARP-WASP Complex	0.862	0.204	RRAS2,RND3,RHOB,GNA12,ARPC5,SOS1,BAIAP2,RAC1,RHOU,RHOF,ITGA4
HGF Signaling	0.861	0.183	MAP2K4,MAP3K9,RAPGEF1,PIK3R1,RAC1,MAPK9,MAP3K5,PRKCG,MAP3K10,RRAS2,ETS2,IRS1,SOS1,PRKCE,IRS2,PRKCH,PIK3R2,MAP2K1,PRKD3,ITGA4
Role of JAK2 in Hormone-like Cytokine Signaling	0.847	0.226	EPOR,IRS1,SH2B3,SH2B2,IRS2,SOCS7,STAT5B
Retinoate Biosynthesis II	0.847	1	RBP1
Acyl Carrier Protein Metabolism	0.847	1	AASDHPPT
Anandamide Degradation	0.847	1	FAAH
Alanine Biosynthesis III	0.847	1	NFS1
TCA Cycle II (Eukaryotic)	0.839	0.25	SDHA,SDHB,IDH3G,DHTKD1,IDH3B
VDR/RXR Activation	0.828	0.192	LRP5,PDGFA,IGFBP5,HR,NCOA3,PRKCG,EP300,NCOA2,TRPV6,TGFB2,PRKCE,PRKCH,CALB1,PRKD3
ERK5 Signaling	0.822	0.197	RPS6KA6,YWHAG,RRAS2,SGK1,GNA12,CREBBP,RPS6KA4,RPS6KA5,MAPK7,MAP2K5,EGFR,EP300
CMP-N-acetylneuraminate Biosynthesis I (Eukaryotes)	0.821	0.4	NAGK,NANS
Myo-inositol Biosynthesis	0.821	0.4	ISYNA1,INPP5F
Lysine Degradation V	0.821	0.4	AASDHPPT,PIPOX
Folate Polyglutamylation	0.821	0.4	MTHFD1L,FPGS
Mismatch Repair in Eukaryotes	0.811	0.267	MSH2,RFC4,FEN1,RFC3
PDGF Signaling	0.775	0.184	MAP2K4,PDGFA,PIK3R1,ACP1,CRK,PDGFC,SYNJ2,RRAS2,INPP5F,INPP5B,IRS1,SOS1,CAV1,IRS2,PIK3R2,MAP2K1
VEGF Family Ligand-Receptor Interactions	0.768	0.185	FLT1,NRP2,PIK3R1,PLA2G3,PRKCG,RRAS2,IRS1,SOS1,PRKCE,PRKCH,IRS2,PIK3R2,KDR,MAP2K1,PRKD3
14-3-3-mediated Signaling	0.761	0.176	MAP2K4,YWHAG,PIK3R1,MAPK9,GSK3A,MAP3K5,PLCL2,PLCH2,PRKCG,PLCB4,RRAS2,MAPT,IRS1,PRKCE,IRS2,TUBB4A,PRKCH,PIK3R2,PDCD6IP,MAP2K1,PRKD3
PPARα/RXRα Activation	0.748	0.171	MAP2K4,RELA,NFKBIE,PLCH2,EP300,NR2F1,CHD5,GPD2,FASN,SOS1,LPL,TGFB2,ADCY8,STAT5B,MAP2K1,ADCY2,GNAS,IL1RAPL2,CREBBP,ADCY6,PLCL2,NCOA3,PLCB4,RRAS2,IRS1,INSR,IL1RAPL1
Stearate Biosynthesis I (Animals)	0.743	0.212	DHCR24,SLC27A2,FASN,ACSL4,MBOAT7,ACOT8,THEM4
Pyrimidine Ribonucleotides De Novo Biosynthesis	0.739	0.205	SLC25A42,NME3,AK5,NME5,ENTPD1,CTPS2,ENTPD3,UMPS
Prolactin Signaling	0.737	0.183	PIK3R1,CREBBP,PRKCG,EP300,RRAS2,IRS1,SOS1,PRKCE,PRKCH,IRS2,PIK3R2,STAT5B,SOCS7,MAP2K1,PRKD3
Chronic Myeloid Leukemia Signaling	0.734	0.178	RELA,GAB2,HDAC9,RBL2,HDAC4,PIK3R1,CDK4,CRK,RB1,RRAS2,IRS1,SOS1,CTBP2,TGFB2,IRS2,PIK3R2,STAT5B,MAP2K1
Non-Small Cell Lung Cancer Signaling	0.73	0.184	STK4,RB1,FHIT,RRAS2,IRS1,PIK3R1,RARB,SOS1,CDK4,IRS2,RASSF5,PIK3R2,MAP2K1,EGFR
IL-17A Signaling in Gastric Cells	0.71	0.227	MAP2K4,RELA,MAPK9,MAPK11,EGFR
Small Cell Lung Cancer Signaling	0.708	0.181	NOS1,RELA,TRAF3,FHIT,NFKBIE,PIK3R1,CDK4,BCL2,RB1,IRS1,RARB,CKS1B,IRS2,PIK3R2,BIRC2
Growth Hormone Signaling	0.699	0.182	PIK3R1,RPS6KA5,PRKCG,RPS6KA6,IRS1,IGF1R,PRKCE,PRKCH,IRS2,RPS6KA4,PIK3R2,STAT5B,SOCS7,PRKD3
Aryl Hydrocarbon Receptor Signaling	0.699	0.172	RELA,MGST1,RBL2,NFIC,POLA1,NQO1,CDK4,RARG,NCOA3,EP300,NR2F1,RB1,ALDH1L1,CCND2,NCOA2,NFIA,RARB,TGFB2,NFIB,NRIP1,AHR,MGST3
Mechanisms of Viral Exit from Host Cells	0.696	0.2	CHMP2A,PRKCE,XPO1,PRKCH,SH3GL2,PDCD6IP,PRKD3,PRKCG
Integrin Signaling	0.69	0.165	MAP2K4,RAP2A,RAPGEF1,PIK3R1,Wasl,ARPC5,CRK,BCAR1,RHOB,SOS1,CAV1,RHOU,IRS2,VCL,PIK3R2,RHOF,MAP2K1,ITGA4,CAPN5,RALB,RAC1,BCAR3,GIT1,ARF5,RRAS2,RND3,PAK3,IRS1,CAPN1,ZYX,PAK5,CTTN,NEDD9
Chondroitin and Dermatan Biosynthesis	0.687	0.333	CHSY3,CSGALNACT1
GDP-glucose Biosynthesis	0.687	0.333	HK1,HK2
ERK/MAPK Signaling	0.678	0.166	RAPGEF1,PIK3R1,PPP2R5B,CRK,BCAR1,EP300,LAMTOR3,ETS2,SOS1,PRKCE,IRS2,PPP2R2C,PIK3R2,PPP1CA,MAP2K1,ITGA4,PPP1R14C,YWHAG,CREBBP,RAC1,PLA2G3,RPS6KA5,PRKCG,RRAS2,H3F3A/H3F3B,PAK3,IRS1,RPS6KA4,PAK5,PPP2R5E
Renal Cell Carcinoma Signaling	0.67	0.179	RAPGEF1,RRAS2,PAK3,IRS1,PIK3R1,SOS1,CREBBP,RAC1,IRS2,PAK5,CRK,PIK3R2,MAP2K1,EP300
Assembly of RNA Polymerase II Complex	0.661	0.191	POLR2G,POLR2F,GTF2H4,POLR2E,ERCC3,POLR2J,POLR2H,GTF2F1,MNAT1
Cell Cycle Regulation by BTG Family Proteins	0.651	0.2	RB1,CNOT7,PPP2R5B,CDK4,BTG1,PPP2R2C,PPP2R5E
April Mediated Signaling	0.651	0.2	MAP2K4,RELA,TRAF3,NFKBIE,MAPK9,NFATC2,MAPK11
PCP pathway	0.642	0.183	CELSR1,MAP2K4,ROR2,WNT7B,VANGL1,RAC1,MAPK9,FZD9,JUND,DVL3,SDC3
Paxillin Signaling	0.634	0.171	MAP2K4,PIK3R1,CSK,RAC1,MAPK9,CRK,MAPK11,BCAR1,GIT2,RRAS2,PAK3,IRS1,SOS1,IRS2,PAK5,PIK3R2,VCL,ITGA4
BER pathway	0.623	0.25	FEN1,APEX1,LIG3
Mitotic Roles of Polo-Like Kinase	0.611	0.18	SLK,CDC20,PLK2,CAPN1,PRC1,PPP2R5B,PPP2R2C,PPP2R5E,CDC26,KIF11,STAG2
Tec Kinase Signaling	0.606	0.164	MAP2K4,RELA,PIK3R1,RHOB,RHOU,PRKCE,IRS2,PIK3R2,RHOF,STAT5B,PRKD3,ITGA4,VAV2,GNAS,GNA12,GNAI1,MAPK9,PRKCG,RND3,PAK3,IRS1,GNAO1,PAK5,PRKCH,STAT2
Angiopoietin Signaling	0.604	0.176	RELA,RRAS2,PAK3,ANGPT1,IRS1,NFKBIE,PIK3R1,SOS1,IRS2,PAK5,CRK,PIK3R2,STAT5B
Role of JAK family kinases in IL-6-type Cytokine Signaling	0.602	0.208	MAP2K4,MAPK9,OSMR,STAT5B,MAPK11
Signaling by Rho Family GTPases	0.599	0.159	MAP2K4,RELA,SEPT3,PIK3R1,ARPC5,WASF3,CDC42EP2,MAP3K10,RHOB,BAIAP2,RHOU,ARHGEF11,IRS2,PIK3R2,RHOF,MAP2K1,ITGA4,MAP3K9,ARHGEF4,GNAS,CDH4,GNA12,RAC1,CDH6,GNAI1,MAPK9,MAP3K21,CDH9,RND3,PAK3,PIP5K1C,IRS1,GNAO1,CDH10,PAK5,ARHGEF9,PIP4K2C
RANK Signaling in Osteoclasts	0.587	0.17	MAP2K4,RELA,MAP3K9,NFKBIE,PIK3R1,MAPK9,PPP3CC,MAP3K5,MAPK11,MAP3K10,IRS1,NFATC2,IRS2,PIK3R2,MAP2K1,BIRC2
UVA-Induced MAPK Signaling	0.587	0.17	MAP2K4,PIK3R1,MAPK9,RPS6KA5,PLCL2,PLCH2,MAPK11,RPS6KA6,PLCB4,MTOR,RRAS2,IRS1,IRS2,RPS6KA4,PIK3R2,EGFR
Breast Cancer Regulation by Stathmin1	0.584	0.161	CAMK1,CAMK1D,PIK3R1,PPP2R5B,TRPC5,SOS1,PRKCE,TUBB4A,IRS2,PPP2R2C,ARHGEF11,PIK3R2,PPP1CA,ADCY8,MAP2K1,PRKD3,CAMK2B,PPP1R14C,ARHGEF4,ADCY2,GNAS,GNAI1,RAC1,ADCY6,PRKCG,PLCB4,RRAS2,IRS1,PRKCH,PPP2R5E,ARHGEF9
Sphingosine and Sphingosine-1-phosphate Metabolism	0.581	0.286	ACER2,SGPP1
Glucose and Glucose-1-phosphate Degradation	0.581	0.286	HK1,HK2
Uracil Degradation II (Reductive)	0.578	0.5	DPYSL2
Asparagine Degradation I	0.578	0.5	ASRGL1
β-alanine Degradation I	0.578	0.5	ABAT
Uridine-5'-phosphate Biosynthesis	0.578	0.5	UMPS
Thymine Degradation	0.578	0.5	DPYSL2
Glycine Degradation (Creatine Biosynthesis)	0.578	0.5	GATM
Cardiolipin Biosynthesis II	0.578	0.5	PGS1
Putrescine Biosynthesis III	0.578	0.5	ODC1
Lactose Degradation III	0.578	0.5	GLB1
Glutamate Dependent Acid Resistance	0.578	0.5	GAD1
IL-8 Signaling	0.573	0.16	MAP2K4,RELA,PIK3R1,PDGFC,BCL2,MTOR,RHOB,RHOU,PRKCE,IRS2,PIK3R2,RHOF,MAP2K1,PRKD3,EGFR,GNAS,FLT1,ANGPT1,GNA12,GNAI1,RAC1,MAPK9,PRKCG,RRAS2,CCND2,RND3,IRS1,PRKCH,KDR,MMP9
B Cell Activating Factor Signaling	0.571	0.189	MAP2K4,RELA,TRAF3,NFKBIE,MAPK9,NFATC2,MAPK11
Pyrimidine Ribonucleotides Interconversion	0.571	0.189	SLC25A42,NME3,AK5,NME5,ENTPD1,CTPS2,ENTPD3
ErbB4 Signaling	0.565	0.174	RRAS2,NRG3,IRS1,PIK3R1,SOS1,PRKCE,IRS2,PRKCH,PIK3R2,PRKD3,MAP2K1,PRKCG
PEDF Signaling	0.563	0.171	RELA,NFKBIE,PIK3R1,SERPINF1,RAC1,ZEB1,PNPLA2,MAPK11,BCL2,RRAS2,IRS1,DOCK3,IRS2,PIK3R2
Wnt/Ca+ pathway	0.558	0.18	RELA,PLCB4,CREBBP,NFATC2,FZD9,DVL3,PLCL2,PLCH2,EP300
Fatty Acid β-oxidation I	0.555	0.2	HSD17B10,SLC27A2,SCP2,ACSL4,ACADM
Cholesterol Biosynthesis I	0.554	0.231	DHCR24,HSD17B7,SC5D
Cholesterol Biosynthesis II (via 24,25-dihydrolanosterol)	0.554	0.231	DHCR24,HSD17B7,SC5D
Cholesterol Biosynthesis III (via Desmosterol)	0.554	0.231	DHCR24,HSD17B7,SC5D
D-myo-inositol-5-phosphate Metabolism	0.553	0.163	PPP1R1B,PPP2R5B,PPFIA3,ACP1,IGBP1,NUDT14,NUDT2,PLCH2,PPP4C,PTPRM,PTPRF,PLCB4,INPP5F,PTPRO,INPP5B,PPM1H,SGPP1,MTMR7,PPP2R5E,PPP1CA,PTPRN,PIP4K2C
Superpathway of Inositol Phosphate Compounds	0.547	0.158	PIK3R1,PPFIA3,PPP2R5B,ACP1,IGBP1,NUDT14,NUDT2,PPP4C,PLCH2,PTPRF,PTPRO,INPP5B,KIT,IRS2,PIK3R2,PPP1CA,PTPRN,EGFR,PPP1R1B,ITPKA,PTPRM,SYNJ2,PLCB4,INPP5F,PIP5K1C,IRS1,PPM1H,MTMR7,SGPP1,PPP2R5E,PPIP5K2,PIP4K2C
SAPK/JNK Signaling	0.541	0.167	MAP2K4,MAP3K9,GNA12,PIK3R1,MAPK8IP2,RAC1,MAPK9,CRK,MAP3K5,MAPK8IP1,MAP3K10,RRAS2,IRS1,SOS1,IRS2,PIK3R2
Glioblastoma Multiforme Signaling	0.54	0.161	PDGFA,PIK3R1,CDK4,RAC1,FZD9,PLCL2,PLCH2,PDGFC,RB1,PLCB4,MTOR,RRAS2,RND3,RHOB,IRS1,WNT7B,SOS1,IGF1R,RHOU,IRS2,PIK3R2,RHOF,MAP2K1,EGFR
Antiproliferative Role of Somatostatin Receptor 2	0.538	0.171	NOS1,RRAS2,GUCY1A3,SSTR2,IRS1,PIK3R1,GUCY1A2,SST,IRS2,PIK3R2,MAP2K1,GUCY1B3
fMLP Signaling in Neutrophils	0.537	0.164	RELA,GNAS,NFKBIE,PIK3R1,ARPC5,RAC1,GNAI1,PPP3CC,PRKCG,PLCB4,RRAS2,IRS1,PRKCE,NFATC2,IRS2,PRKCH,PIK3R2,MAP2K1,PRKD3
Sertoli Cell-Sertoli Cell Junction Signaling	0.534	0.16	NOS1,SPTBN2,MAP2K4,MAP3K9,EPN1,GUCY1A3,RAC1,YBX3,MAPK9,GSK3A,MAP3K5,BCAR1,MAPK11,MAP3K10,TJP3,PRKG1,TJAP1,RRAS2,GUCY1A2,TUBB4A,VCL,MAGI2,MAP2K1,GUCY1B3,ITGA4
HIF1α Signaling	0.532	0.165	NOS1,PIK3R1,CREBBP,MMP15,MAPK9,NAA10,PDGFC,MAPK11,LDHB,EP300,RRAS2,IRS1,IRS2,PIK3R2,MAPK7,APEX1,MMP9
HMGB1 Signaling	0.529	0.163	MAP2K4,RELA,HAT1,PIK3R1,IFNGR2,RBBP7,RAC1,MAPK9,MAPK11,RRAS2,RHOB,RND3,IRS1,RHOU,TGFB2,IRS2,PIK3R2,RHOF,MAP2K1,MAP2K5
Interferon Signaling	0.523	0.188	RELA,IFNGR2,STAT2,TAP1,IFITM2,BCL2
α-Adrenergic Signaling	0.516	0.167	ADCY2,GNAS,GNAI1,ADCY6,SLC8A2,PRKCG,RRAS2,ADRA2A,PRKCE,PRKCH,ADCY8,SLC8A1,MAP2K1,PRKD3
G Beta Gamma Signaling	0.516	0.167	ADCY2,GNAS,CAV2,GNA12,GNAI1,PRKCG,RRAS2,SOS1,GNAO1,CAV1,PRKCE,PRKCH,PRKD3,EGFR
Regulation of IL-2 Expression in Activated and Anergic T Lymphocytes	0.513	0.169	MAP2K4,VAV2,RELA,RRAS2,NFKBIE,SOS1,RAC1,TGFB2,MAPK9,NFATC2,PPP3CC,MAP2K1
Ephrin B Signaling	0.513	0.169	EPHB6,VAV2,EFNB2,GNAS,KALRN,EPHB2,GNA12,GNAO1,GNAI1,RAC1,EPHB3,ACP1
P2Y Purigenic Receptor Signaling Pathway	0.51	0.161	RELA,ADCY2,PIK3R1,CREBBP,ADCY6,GNAI1,PLCL2,PLCH2,EP300,PRKCG,PLCB4,RRAS2,IRS1,PRKCE,IRS2,PRKCH,PIK3R2,ADCY8,MAP2K1,PRKD3
3-phosphoinositide Biosynthesis	0.507	0.158	PIK3R1,PPFIA3,PPP2R5B,ACP1,IGBP1,NUDT14,NUDT2,PPP4C,PTPRF,PTPRO,INPP5B,KIT,IRS2,PIK3R2,PPP1CA,PTPRN,EGFR,PPP1R1B,PTPRM,INPP5F,PIP5K1C,IRS1,PPM1H,MTMR7,SGPP1,PPP2R5E,PIP4K2C
Pyrimidine Deoxyribonucleotides De Novo Biosynthesis I	0.501	0.2	NME3,AK5,NME5,RRM2
1D-myo-inositol Hexakisphosphate Biosynthesis II (Mammalian)	0.501	0.2	SYNJ2,INPP5F,INPP5B,ITPKA
D-myo-inositol (1,3,4)-trisphosphate Biosynthesis	0.501	0.2	SYNJ2,INPP5F,INPP5B,ITPKA
Endoplasmic Reticulum Stress Pathway	0.501	0.2	CALR,ERN1,MAP3K5,HSPA5
Role of IL-17F in Allergic Inflammatory Airway Diseases	0.5	0.179	RELA,RPS6KA6,CREBBP,RPS6KA4,RPS6KA5,MAP2K1,EP300
Phagosome Formation	0.499	0.163	PIK3R1,PLCL2,PLCH2,PRKCG,PLCB4,RHOB,RND3,IRS1,RHOU,PRKCE,PRKCH,IRS2,PIK3R2,RHOF,PRKD3,ITGA4
Hepatic Fibrosis / Hepatic Stellate Cell Activation	0.496	0.158	COL19A1,RELA,COL4A1,CTGF,IL1RAPL2,FLT1,PDGFA,KLF6,IFNGR2,COL9A3,IGFBP5,PDGFC,COL15A1,BCL2,COL1A1,COL23A1,IGF1R,TGFB2,COL22A1,COL11A1,IL1RAPL1,KDR,KLF12,COL25A1,MMP9,EGFR
nNOS Signaling in Skeletal Muscle Cells	0.494	0.214	NOS1,RYR2,DMD
γ-linolenate Biosynthesis II (Animals)	0.494	0.214	SLC27A2,ACSL4,FADS1
FGF Signaling	0.493	0.165	PIK3R1,CREBBP,RAC1,RPS6KA5,CRK,MAP3K5,MAPK11,EP300,IRS1,FGF12,SOS1,IRS2,PIK3R2,MAP2K1
T Cell Receptor Signaling	0.485	0.163	VAV2,MAP2K4,RELA,CSK,PIK3R1,RAC1,PPP3CC,RRAS2,IRS1,PAG1,SOS1,NFATC2,IRS2,PIK3R2,MAP2K1
PI3K Signaling in B Lymphocytes	0.485	0.161	VAV2,RELA,ATF7,NFKBIE,PIK3R1,RAC1,PPP3CC,PLCL2,PLCH2,PLCB4,RRAS2,IRS1,SH2B2,NFATC2,IRS2,PIK3R2,MAP2K1,CAMK2B
Wnt/β-catenin Signaling	0.484	0.157	LRP5,SFRP2,FRZB,SOX10,PPP2R5B,CREBBP,SOX12,GSK3A,FZD9,BCL9,RARG,EP300,SOX2,WNT7B,GNAO1,RARB,TLE3,TGFB2,RUVBL2,SOX8,PPP2R2C,DVL3,PIN1,PPP2R5E,LRP1
Gαi Signaling	0.479	0.16	ADRA2B,ADCY2,GRM2,GNAS,NPY1R,SSTR3,RALB,ADCY6,GNAI1,RGS4,GABBR2,RRAS2,ADRA2A,RGS10,SOS1,CAV1,HTR1A,ADRA2C,ADCY8
Role of p14/p19ARF in Tumor Suppression	0.468	0.175	NPM1,RB1,IRS1,PIK3R1,RAC1,IRS2,PIK3R2
Clathrin-mediated Endocytosis Signaling	0.462	0.155	APOE,AP2A1,EPS15,RAB4A,EPHB2,PDGFA,PIK3R1,CLTB,ARPC5,SH3GL2,PDGFC,AMPH,FGF12,IRS2,PIK3R2,SNAP91,EPN1,RAC1,HIP1,PPP3CC,HSPA8,LDLR,PIP5K1C,IRS1,CTTN,CLU,HIP1R
Regulation of Actin-based Motility by Rho	0.457	0.162	PAK3,RND3,RHOB,PIP5K1C,Wasl,BAIAP2,ARPC5,RHOU,RAC1,PAK5,RHOF,PIP4K2C,ITGA4
Adipogenesis pathway	0.457	0.157	HDAC9,ARNTL,HDAC4,HAT1,RBBP7,FZD9,MNAT1,RBP1,CTNNBIP1,EBF1,EGR2,CDK5,GTF2H4,EZH2,ERCC3,LPL,CTBP2,STAT5B,PER2,SMAD1
Retinol Biosynthesis	0.456	0.19	LPL,LIPE,PNPLA2,RBP1
Activation of IRF by Cytosolic Pattern Recognition Receptors	0.454	0.17	MAP2K4,RELA,TRAF3,NFKBIE,CREBBP,MAPK9,STAT2,PIN1
Chondroitin Sulfate Biosynthesis (Late Stages)	0.452	0.176	NDST3,HS6ST1,CHSY3,HS3ST2,CHST12,CSGALNACT1
TR/RXR Activation	0.445	0.16	NXPH2,PIK3R1,THRA,ME1,NCOA3,EP300,MTOR,LDLR,NCOA2,SCARB1,FASN,IRS1,IRS2,ACACA,PIK3R2
D-myo-inositol (1,4,5,6)-Tetrakisphosphate Biosynthesis	0.444	0.157	PPP1R1B,PPP2R5B,PPFIA3,ACP1,NUDT14,IGBP1,NUDT2,PPP4C,PTPRM,PTPRF,INPP5F,PTPRO,INPP5B,PPM1H,MTMR7,SGPP1,PPP2R5E,PPP1CA,PTPRN
D-myo-inositol (3,4,5,6)-tetrakisphosphate Biosynthesis	0.444	0.157	PPP1R1B,PPP2R5B,PPFIA3,ACP1,NUDT14,IGBP1,NUDT2,PPP4C,PTPRM,PTPRF,INPP5F,PTPRO,INPP5B,PPM1H,MTMR7,SGPP1,PPP2R5E,PPP1CA,PTPRN
GDNF Family Ligand-Receptor Interactions	0.443	0.162	MAP2K4,RRAS2,DOK4,IRS1,PIK3R1,SOS1,RAC1,MAPK9,IRS2,PIK3R2,RET,MAP2K1
GPCR-Mediated Nutrient Sensing in Enteroendocrine Cells	0.443	0.162	PLCB4,ADCY2,GNAS,GNAI1,ADCY6,PRKCE,PRKCH,PLCL2,PLCH2,ADCY8,PRKD3,PRKCG
p38 MAPK Signaling	0.44	0.158	MAP2K4,IL1RAPL2,CREBBP,HMGN1,PLA2G3,RPS6KA5,MAP3K5,MAPK11,EP300,RPS6KA6,H3F3A/H3F3B,MAPT,TGFB2,RPS6KA4,IL1RAPL1,EEF2K
Heparan Sulfate Biosynthesis (Late Stages)	0.437	0.171	NDST3,HS6ST1,HS3ST2,LIPE,CHST12,GLCE,EXTL1
Triacylglycerol Degradation	0.434	0.179	FAAH,NDST3,LPL,LIPE,PNPLA2
Diphthamide Biosynthesis	0.433	0.333	EEF2
Pyruvate Fermentation to Lactate	0.433	0.333	LDHB
NADH Repair	0.433	0.333	NAXE
Methylglyoxal Degradation I	0.433	0.333	HAGHL
Branched-chain α-keto acid Dehydrogenase Complex	0.433	0.333	BCKDHA
5-aminoimidazole Ribonucleotide Biosynthesis I	0.433	0.333	PFAS
Glutathione Biosynthesis	0.433	0.333	GCLM
Biotin-carboxyl Carrier Protein Assembly	0.433	0.333	ACACA
Thiosulfate Disproportionation III (Rhodanese)	0.433	0.333	MOCS3
Rac Signaling	0.431	0.157	MAP2K4,RELA,PIK3R1,ARPC5,RAC1,CYFIP2,RRAS2,PAK3,PIP5K1C,IRS1,BAIAP2,IRS2,PAK5,PIK3R2,MAP2K1,PIP4K2C,ITGA4,IQGAP3
Acute Myeloid Leukemia Signaling	0.431	0.159	MAP2K4,RELA,MTOR,RRAS2,IRS1,PIK3R1,SOS1,KIT,IDH2,IRS2,PIK3R2,STAT5B,MAP2K1,MAP2K5
Gustation Pathway	0.431	0.159	SMPDL3A,PDE2A,ADCY2,ASIC2,PDE9A,PDE10A,ADCY6,PDE1A,PDE1C,PDE7B,PDE1B,ADCY8,P2RX2,APEX1
Acyl-CoA Hydrolysis	0.427	0.222	ACOT8,THEM4
CD40 Signaling	0.421	0.16	MAP2K4,RELA,TRAF3,IRS1,PIK3R1,NFKBIE,MAPK9,IRS2,PIK3R2,MAP2K1,MAPK11,MAP2K5
Neurotrophin/TRK Signaling	0.421	0.16	MAP2K4,RRAS2,IRS1,PIK3R1,SOS1,CREBBP,IRS2,PIK3R2,MAP3K5,MAP2K1,MAP2K5,EP300
PKCθ Signaling in T Lymphocytes	0.418	0.156	VAV2,MAP2K4,RELA,MAP3K9,NFKBIE,PIK3R1,RAC1,PPP3CC,MAP3K5,MAP3K10,RRAS2,IRS1,SOS1,NFATC2,IRS2,PIK3R2,CAMK2B
TGF-β Signaling	0.416	0.159	MAP2K4,CREBBP,SKI,MAPK9,MAPK11,INHBB,BCL2,EP300,RRAS2,SOS1,TGFB2,MAP2K1,SMAD1
IL-22 Signaling	0.415	0.182	MAP2K4,MAPK9,STAT5B,MAPK11
Role of MAPK Signaling in the Pathogenesis of Influenza	0.411	0.161	MAP2K4,PLA2G16,RRAS2,ABHD3,PLA2G3,MAPK9,MAP3K5,MAP2K1,MAPK11,BCL2
Myc Mediated Apoptosis Signaling	0.406	0.159	MAP2K4,YWHAG,RRAS2,IRS1,PIK3R1,SOS1,IGF1R,MAPK9,IRS2,PIK3R2,BCL2
BMP signaling pathway	0.406	0.159	MAP2K4,RELA,RRAS2,SOS1,CREBBP,MAPK9,BMP6,SMAD1,MAP2K1,MAPK11,NOG
Docosahexaenoic Acid (DHA) Signaling	0.401	0.163	IRS1,PIK3R1,SERPINF1,IRS2,GSK3A,PIK3R2,PNPLA2,BCL2
Heparan Sulfate Biosynthesis	0.401	0.163	NDST3,HS6ST1,HS3ST2,B3GAT1,LIPE,CHST12,GLCE,EXTL1
Cancer Drug Resistance By Drug Efflux	0.401	0.163	RRAS2,PIK3R1,ABCG2,ABCC10,PIK3R2,FOXG1,PDK1,MAP2K1
Role of RIG1-like Receptors in Antiviral Innate Immunity	0.4	0.172	RELA,TRAF3,NFKBIE,CREBBP,EP300
Germ Cell-Sertoli Cell Junction Signaling	0.399	0.152	MAP2K4,MAP3K9,EPN1,PIK3R1,RAC1,MAPK9,MAP3K5,BCAR1,MAP3K10,RRAS2,RND3,RHOB,PAK3,IRS1,RHOU,TGFB2,ZYX,IRS2,PAK5,TUBB4A,PIK3R2,VCL,RHOF,MAP2K1
HER-2 Signaling in Breast Cancer	0.397	0.157	PIK3R1,GSK3A,MAP3K5,PRKCG,RRAS2,IRS1,SOS1,PRKCE,PRKCH,IRS2,PIK3R2,PRKD3,EGFR
Apoptosis Signaling	0.397	0.157	MAP2K4,CAPN5,RELA,NFKBIE,LMNA,MAP3K5,BCL2,RRAS2,CAPN1,PRKCE,MAP2K1,AIFM1,BIRC2
Parkinson's Signaling	0.394	0.188	GPR37,PARK7,MAPK11
Role of IL-17A in Arthritis	0.389	0.159	MAP2K4,RELA,IRS1,PIK3R1,NFKBIE,MAPK9,IRS2,PIK3R2,MAP2K1,MAPK11
Cell Cycle: G1/S Checkpoint Regulation	0.389	0.159	RPL11,HDAC9,RB1,RBL2,CCND2,HDAC4,PAK1IP1,CDK4,TGFB2,RPL5
GPCR-Mediated Integration of Enteroendocrine Signaling Exemplified by an L Cell	0.389	0.159	PLCB4,ADCY2,GNAS,SSTR5,GNAI1,ADCY6,SST,PLCL2,PLCH2,ADCY8
Chondroitin Sulfate Biosynthesis	0.382	0.163	NDST3,HS6ST1,CHSY3,HS3ST2,B3GAT1,CHST12,CSGALNACT1
CCR3 Signaling in Eosinophils	0.382	0.153	GNAS,PIK3R1,RAC1,GNAI1,PLA2G3,MAPK11,PRKCG,PLCB4,RRAS2,PAK3,IRS1,PRKCE,IRS2,PAK5,PRKCH,PIK3R2,MAP2K1,PRKD3
D-myo-inositol (1,4,5)-Trisphosphate Biosynthesis	0.378	0.174	PLCB4,PIP5K1C,PLCH2,PIP4K2C
Phospholipase C Signaling	0.377	0.149	RELA,EP300,RHOB,SOS1,RHOU,PRKCE,ARHGEF11,RHOF,ADCY8,PRKD3,MAP2K1,ITGA4,HDAC9,ARHGEF4,ADCY2,GNAS,HDAC4,CREBBP,RALB,RAC1,ADCY6,PLA2G3,PPP3CC,PRKCG,PLCB4,RRAS2,RND3,NFATC2,PRKCH,ARHGEF9
Prostate Cancer Signaling	0.375	0.154	RB1,RELA,MTOR,RRAS2,IRS1,PIK3R1,NFKBIE,SOS1,CREBBP,IRS2,PIK3R2,MAP2K1,EP300,BCL2
Ephrin A Signaling	0.372	0.158	VAV2,IRS1,PIK3R1,RAC1,EPHA5,IRS2,PIK3R2,EPHA3,BCAR1
Fatty Acid Activation	0.369	0.2	SLC27A2,ACSL4
UDP-N-acetyl-D-galactosamine Biosynthesis II	0.369	0.2	HK1,HK2
Glucocorticoid Receptor Signaling	0.369	0.148	MAP2K4,RELA,POLR2F,SGK1,PIK3R1,NFKBIE,POLR2J,MNAT1,HSPA5,MAPK11,PGR,BCL2,EP300,NCOA2,SUMO1,SOS1,TGFB2,IRS2,PIK3R2,STAT5B,MAP2K1,CREBBP,HSPA9,RAC1,MAPK9,POLR2H,GTF2F1,PPP3CC,NCOA3,POLR2G,HSPA8,RRAS2,GTF2H4,POLR2E,IRS1,ERCC3,FKBP4,NFATC2,NRIP1
AMPK Signaling	0.368	0.149	ADRA2B,PIK3R1,PPP2R5B,LIPE,CFTR,MAPK11,EP300,MTOR,FASN,RPTOR,PPP2R2C,IRS2,PIK3R2,EEF2K,CHRNA5,CHRNA4,GNAS,EEF2,CREBBP,FOXG1,AK5,ADRA2A,IRS1,ADRA2C,ACACA,INSR,PPP2R5E
Gα12/13 Signaling	0.367	0.151	VAV2,MAP2K4,RELA,CDH4,NFKBIE,GNA12,PIK3R1,CDH6,MAPK9,MAP3K5,RRAS2,CDH9,IRS1,CDH10,IRS2,PIK3R2,MAPK7,MAP2K1
Macropinocytosis Signaling	0.362	0.154	RRAS2,PDGFA,IRS1,PIK3R1,RAC1,PRKCE,IRS2,PRKCH,PIK3R2,PRKD3,PDGFC,PRKCG
FcγRIIB Signaling in B Lymphocytes	0.354	0.157	MAP2K4,RRAS2,IRS1,PIK3R1,SOS1,MAPK9,IRS2,PIK3R2
Calcium-induced T Lymphocyte Apoptosis	0.354	0.157	PRKCE,NFATC2,PRKCH,PPP3CC,PRKD3,ATP2A2,PRKCG,EP300
Tryptophan Degradation III (Eukaryotic)	0.353	0.176	HSD17B10,PARK7,IDO1
Systemic Lupus Erythematosus Signaling	0.347	0.148	CD2BP2,PIK3R1,TXNL4A,HNRNPA2B1,LSM2,SNRNP35,SNRPN,LSM14A,MTOR,RRAS2,IRS1,SOS1,SNRNP70,NFATC2,IRS2,PIK3R2,SNU13,LSM7,HNRNPC,LSM5,SNRPA1,LSM4,SNRNP40
ILK Signaling	0.345	0.148	MAP2K4,RELA,PIK3R1,PPP2R5B,GSK3A,PDGFC,EP300,MTOR,TGFB1I1,RHOB,RHOU,IRS2,PPP2R2C,PIK3R2,VCL,RHOF,NACA,CREBBP,MAPK9,RPS6KA5,RND3,IRS1,SH2B2,RPS6KA4,PPP2R5E,MMP9
IL-4 Signaling	0.344	0.152	SYNJ2,MTOR,RRAS2,IL13RA1,INPP5F,INPP5B,IRS1,PIK3R1,SOS1,NFATC2,IRS2,PIK3R2
Mouse Embryonic Stem Cell Pluripotency	0.34	0.15	PIK3R1,CREBBP,FZD9,MAPK11,LIFR,SOX2,RRAS2,IRS1,SOS1,IRS2,DVL3,PIK3R2,MAP2K1,SMAD1,ID4
2-ketoglutarate Dehydrogenase Complex	0.338	0.25	DHTKD1
Tetrapyrrole Biosynthesis II	0.338	0.25	HMBS
Tryptophan Degradation to 2-amino-3-carboxymuconate Semialdehyde	0.338	0.25	IDO1
N-acetylglucosamine Degradation II	0.338	0.25	NAGK
3-phosphoinositide Degradation	0.336	0.148	PPP1R1B,PPP2R5B,PPFIA3,ACP1,NUDT14,IGBP1,NUDT2,PPP4C,PTPRM,PTPRF,SYNJ2,INPP5F,PTPRO,INPP5B,PPM1H,SGPP1,MTMR7,PPP2R5E,PPP1CA,PTPRN
Dermatan Sulfate Biosynthesis	0.334	0.156	NDST3,HS6ST1,CHSY3,HS3ST2,B3GAT1,CHST12,CSGALNACT1
Actin Cytoskeleton Signaling	0.332	0.146	PDGFA,PIK3R1,ARPC5,CRK,BCAR1,SSH1,PDGFC,CYFIP2,BAIAP2,SOS1,FGF12,IRS2,VCL,PIK3R2,MAP2K1,MATK,ITGA4,IQGAP3,VAV2,ARHGEF4,CSK,GNA12,RAC1,GIT1,RRAS2,PAK3,PIP5K1C,IRS1,PAK5,PIP4K2C
Induction of Apoptosis by HIV1	0.33	0.153	MAP2K4,RELA,BBC3,NFKBIE,MAPK9,MAP3K5,SLC25A5,BCL2,BIRC2
Role of PI3K/AKT Signaling in the Pathogenesis of Influenza	0.33	0.153	RELA,IRS1,PIK3R1,NFKBIE,GNAI1,CRK,IRS2,PIK3R2,MAP2K1
ErbB2-ErbB3 Signaling	0.329	0.152	RRAS2,NRG3,IRS1,PIK3R1,SOS1,IRS2,GSK3A,PIK3R2,STAT5B,MAP2K1
Pancreatic Adenocarcinoma Signaling	0.324	0.148	MAP2K4,RELA,PIK3R1,CDK4,RAC1,MAPK9,PDGFC,BCL2,RB1,IRS1,TGFB2,IRS2,PIK3R2,NOTCH1,MAP2K1,MMP9,EGFR
Hereditary Breast Cancer Signaling	0.323	0.147	NPM1,HDAC9,POLR2F,HDAC4,PIK3R1,CREBBP,CDK4,POLR2J,POLR2H,EP300,POLR2G,RB1,RRAS2,RFC4,MSH2,POLR2E,IRS1,IRS2,PIK3R2,RFC3
D-myo-inositol (1,4,5)-trisphosphate Degradation	0.316	0.167	SYNJ2,INPP5F,INPP5B
Phosphatidylglycerol Biosynthesis II (Non-plastidic)	0.314	0.16	AGPAT5,AGPAT1,PGS1,MBOAT7
Superpathway of D-myo-inositol (1,4,5)-trisphosphate Metabolism	0.314	0.16	SYNJ2,INPP5F,INPP5B,ITPKA
Oncostatin M Signaling	0.313	0.156	RRAS2,SOS1,OSMR,STAT5B,MAP2K1
tRNA Charging	0.312	0.154	VARS2,KARS,LARS2,AARS2,VARS,IARS
Regulation of Cellular Mechanics by Calpain Protease	0.311	0.151	CAPN5,RB1,RRAS2,CAPN1,CDK4,VCL,ITGA4,EGFR
Glioma Invasiveness Signaling	0.311	0.149	RRAS2,RND3,RHOB,IRS1,PIK3R1,RHOU,IRS2,PIK3R2,RHOF,MMP9
EGF Signaling	0.311	0.149	MAP2K4,MTOR,IRS1,PIK3R1,SOS1,IRS2,PIK3R2,MAP2K1,MAPK11,EGFR
NF-κB Activation by Viruses	0.311	0.148	RELA,RRAS2,IRS1,PIK3R1,NFKBIE,PRKCE,IRS2,PRKCH,PIK3R2,PRKD3,ITGA4,PRKCG
JAK/Stat Signaling	0.311	0.148	RELA,MTOR,RRAS2,IRS1,PIK3R1,SOS1,STAT2,IRS2,PIK3R2,SOCS7,STAT5B,MAP2K1
Epithelial Adherens Junction Signaling	0.311	0.146	VAV2,RAPGEF1,DLL1,EPN1,LMO7,ARPC5,RAC1,CRK,PTPRM,RRAS2,BAIAP2,TGFB2,SSX2IP,ZYX,TUBB4A,VCL,MAGI2,NOTCH1,EGFR
IL-12 Signaling and Production in Macrophages	0.31	0.147	MAP2K4,RELA,APOE,PIK3R1,MAPK9,MAPK11,PRKCG,EP300,IRS1,TGFB2,PRKCE,IRS2,PRKCH,PIK3R2,MAP2K1,PRKD3,CLU
Virus Entry via Endocytic Pathways	0.296	0.146	AP2A1,PIK3R1,CLTB,RAC1,PRKCG,RRAS2,IRS1,CAV1,PRKCE,PRKCH,IRS2,PIK3R2,PRKD3,ITGA4
LXR/RXR Activation	0.295	0.146	RELA,APOE,SCD,IL1RAPL2,ABCG4,SERPINF1,LDLR,FASN,LPL,ACACA,IL1RAPL1,CLU,MMP9
Melanoma Signaling	0.292	0.148	RB1,RRAS2,IRS1,PIK3R1,CDK4,IRS2,PIK3R2,MAP2K1
Amyloid Processing	0.291	0.149	CAPN5,CDK5,MAPT,CAPN1,PRKCE,BACE1,MAPK11
Leukocyte Extravasation Signaling	0.29	0.144	MAP2K4,PIK3R1,Wasl,MMP15,CRK,BCAR1,MAPK11,CYBA,SIPA1,ARHGAP12,PRKCE,IRS2,RASSF5,VCL,PIK3R2,PRKD3,DLC1,ITGA4,VAV2,GNAI1,RAC1,MAPK9,PRKCG,IRS1,PRKCH,CTTN,MMP9
OX40 Signaling Pathway	0.29	0.15	MAP2K4,RELA,TRAF3,NFKBIE,MAPK9,BCL2
Role of JAK1, JAK2 and TYK2 in Interferon Signaling	0.283	0.158	RELA,IFNGR2,STAT2
Ceramide Signaling	0.281	0.144	MAP2K4,RELA,RRAS2,S1PR5,IRS1,PIK3R1,PPP2R5B,PPP2R2C,IRS2,PIK3R2,PPP2R5E,MAP2K1,BCL2
Antioxidant Action of Vitamin C	0.28	0.145	MAP2K4,PLA2G16,RELA,PLCB4,ABHD3,NFKBIE,PLA2G3,MAPK9,PLCL2,PLCH2,STAT5B,MAPK11
Cleavage and Polyadenylation of Pre-mRNA	0.279	0.167	PAPOLA,CPSF3
IL-17A Signaling in Airway Cells	0.277	0.145	MAP2K4,RELA,IRS1,PIK3R1,NFKBIE,MAPK9,IRS2,PIK3R2,MAP2K1,MAPK11
CCR5 Signaling in Macrophages	0.275	0.145	MAP2K4,GNAS,GNAI1,PRKCE,MAPK9,PRKCH,PRKD3,MAPK11,PRKCG
Tetrahydrofolate Salvage from 5,10-methenyltetrahydrofolate	0.271	0.2	MTHFD1L
Glycerol Degradation I	0.271	0.2	GPD2
Lysine Degradation II	0.271	0.2	AASDHPPT
Ceramide Degradation	0.271	0.2	ACER2
Glycogen Biosynthesis II (from UDP-D-Glucose)	0.271	0.2	GBE1
Citrulline-Nitric Oxide Cycle	0.271	0.2	NOS1
Glycine Betaine Degradation	0.271	0.2	PIPOX
Telomerase Signaling	0.27	0.143	HDAC9,HDAC4,PIK3R1,PPP2R5B,RB1,RRAS2,ETS2,IRS1,SOS1,PPP2R2C,IRS2,PIK3R2,PPP2R5E,MAP2K1,EGFR
Superpathway of Cholesterol Biosynthesis	0.26	0.148	DHCR24,HSD17B7,HMGCS2,SC5D
Lymphotoxin β Receptor Signaling	0.259	0.143	RELA,TRAF3,IRS1,PIK3R1,CREBBP,IRS2,PIK3R2,EP300,BIRC2
DNA Methylation and Transcriptional Repression Signaling	0.254	0.15	MTA1,MBD3,RBBP7
Glutathione-mediated Detoxification	0.254	0.15	MGST1,Gsta4,MGST3
MIF Regulation of Innate Immunity	0.244	0.143	MAP2K4,RELA,NFKBIE,PLA2G3,MAPK9
Notch Signaling	0.244	0.143	DLL1,FURIN,NOTCH1,NUMBL,RFNG
Glutaryl-CoA Degradation	0.243	0.154	HSD17B10,PARK7
Urate Biosynthesis/Inosine 5'-phosphate Degradation	0.243	0.154	IMPDH2,IMPDH1
TNFR2 Signaling	0.237	0.143	MAP2K4,RELA,NFKBIE,BIRC2
Estrogen Biosynthesis	0.237	0.143	HSD17B10,HSD17B11,HSD17B7,CYP2J2
Ethanol Degradation IV	0.228	0.143	ALDH1L1,CAT,CYGB
Airway Pathology in Chronic Obstructive Pulmonary Disease	0.22	0.167	MMP9
Histidine Degradation III	0.22	0.167	MTHFD1L
Zymosterol Biosynthesis	0.22	0.167	HSD17B7
DNA Double-Strand Break Repair by Non-Homologous End Joining	0.213	0.143	DCLRE1C,LIG3
Ubiquinol-10 Biosynthesis (Eukaryotic)	0.213	0.143	CYP26B1,BCKDHA
Mitochondrial L-carnitine Shuttle Pathway	0.213	0.143	SLC27A2,ACSL4
Leukotriene Biosynthesis	0.181	0.143	LTA4H
Phosphatidylcholine Biosynthesis I	0.181	0.143	CHKA
Inositol Pyrophosphates Biosynthesis	0.181	0.143	PPIP5K2
D-myo-inositol (1,4,5)-trisphosphate Degradation	0.25	0.0556	SYNJ2
Role of p14/p19ARF in Tumor Suppression	0.236	0.0465	PIK3R3,PIK3R1
GADD45 Signaling	0.235	0.0526	CCNB1
Cardiomyocyte Differentiation via BMP Receptors	0.221	0.05	BMPR2
Granzyme A Signaling	0.221	0.05	HMGB2
The Visual Cycle	0.221	0.05	DHRS4
D-myo-inositol (1,3,4)-trisphosphate Biosynthesis	0.221	0.05	SYNJ2

## Sheet: DAVID GO
Thap1+/- Striatum vs WT Striatum
Term	PValue	(neg)log	Genes	Fold Enrichment	Bonferroni	Benjamini	FDR
GO:0006412~translation	4.45543e-19	18.3511	EIF6, RPL18, RPL17, RPL36A, VARS2, RPL19, RPL14, RBM3, RPL15, RPLP2, EIF2A, RPS2, RPS3, RPLP0, RPLP1, FAU, RPL10, EIF1, RPL11, RPL12, RPS27A, RPL36AL, MRPL2, RPL35A, EEF2, RPS4X, RSL1D1, EIF4G3, RPS18, MRPS18C, RPS19, RPL41, MRPS18A, RPS17, RPS14, RPS15, EIF4A1, EIF2S2, RPS12, EEF1G, RPS11, AARS2, MRPS17, MRPS16, EEF1B2, RPL35, RPL27A, RPL36, RPL37, RPL38, VARS, KARS, MRPL20, IARS, MRPL11, RPS26,…	2.57431	1.50237e-15	1.50237e-15	8.1272e-16
GO:0007268~synaptic transmission	7.36417e-09	8.13288	SYT1, CLSTN1, DMPK, CTTNBP2, GRIN2B, TRIM9, GRIN2D, CHRNA4, SLC22A3, SV2B, CHRNA7, SHC3, GABRG1, STX1A, NRXN2, PICK1, GRIN2A, STXBP1, NRXN1, PCLO, CDK5, GRM2, CHRM3, ABAT, VAMP2, NCAN, UNC13B, MYO5A, ADORA2A, HRH1, SYN1, DMD, SYN2, APBA2, AGRN, SNAP25, GAD1, APBA1, GABRD, KLK8, DLGAP1, PARK7, SLC17A7, P2RX2, TMOD2, SLC5A7, SYNGAP1, CACNA1C, CACNA1A, CACNA1B	2.3781	2.48317e-05	1.24159e-05	1.34331e-05
GO:0019226~transmission of nerve impulse	1.48382e-08	7.82862	SYT1, CLSTN1, DMPK, CTTNBP2, GRIN2B, TRIM9, GRIN2D, CHRNA4, SLC22A3, SV2B, CHRNA7, OLIG2, SHC3, GABRG1, STX1A, EGR2, NRXN2, PICK1, STXBP1, GRIN2A, NRXN1, CACNG2, PCLO, CDK5, GRM2, CHRM3, NAB1, ABAT, VAMP2, NCAN, UNC13B, MYO5A, ADORA2A, FKBP1B, HRH1, SYN1, DMD, SYN2, APBA2, POU3F1, AGRN, SNAP25, GAD1, APBA1, GABRD, KLK8, DLGAP1, SCD2, SOD1, PARK7, SLC17A7, P2RX2, TMOD2, SLC5A7, SYNGAP1, CACNA1C, C…	2.1727	5.00331e-05	1.6678e-05	2.70665e-05
GO:0007267~cell-cell signaling	9.36201e-07	6.02863	SYT1, PDGFA, LTBP4, CLSTN1, ILDR2, DMPK, CTTNBP2, GRIN2B, TRIM9, GRIN2D, CHRNA4, SLC22A3, CHRNA7, SV2B, SHC3, GABRG1, STX1A, NRXN2, PICK1, STXBP1, GRIN2A, NRXN1, PCLO, CDK5, IRS1, GRM2, CHRM3, ABAT, VAMP2, NCAN, UNC13B, MYO5A, ADORA2A, TNC, SOX2, FKBP1B, HRH1, SYN1, DMD, SYN2, APBA2, NKX2-1, AGRN, SNAP25, GAD1, APBA1, GABRD, KLK8, DLGAP1, DLGAP3, HTT, DLGAP5, CELSR1, PARK7, SLC17A7, WNT7B, SALL1,…	1.86837	0.00315189	0.000788906	0.00170772
GO:0044057~regulation of system process	1.13164e-06	5.94629	CAV1, THRA, ADORA2A, CTNND2, RIMS1, FKBP1B, DMPK, TGFB2, EPHB2, LNPEP, ATP2B2, GRIN2B, GRIN2D, GUCY1A3, CHRNA7, SLC8A1, KLK8, STX1A, GNAO1, PTPRM, NOS1, EGR2, HTT, STXBP1, GRIN2A, NLGN2, MYH6, CELSR1, SOD1, GRM1, CDK5, INHBB, HDAC4, YWHAG, GRM2, CHRM3, ATP2A2, RASGRF1, SP4, CACNA1G, RYR2, USP46, CACNA1C, SYNGAP1, CASQ1, CASQ2, CACNA1A, CACNA1B, HTR2A	2.06386	0.00380862	0.000762887	0.00206422
GO:0030030~cell projection organization	1.52052e-06	5.81801	GPRIN1, MTSS1, ENAH, PDGFA, PIP5K1C, GRIN3A, PRKG1, TGFB2, VCL, ATP2B2, IFT20, BOC, EGR2, BAIAP2, STXBP1, DNAIC2, CDK5, SLIT2, NUMBL, SLITRK2, NDEL1, SEMA4F, RASGRF1, 6530402F18RIK, FOXG1, WASL, DST, CHL1, ABLIM1, ADORA2A, CLU, EPHB3, CDH4, EPHB2, LINGO1, DMD, BCL2, RAC1, LMTK2, ETV1, NKX2-1, B3GNT2, TEKT4, DCX, DCLK1, KLK8, BAIAP2L2, BAIAP2L1, TTC30A1, RTN4R, RPGRIP1L, NFASC, DPYSL5, NR4A2, NTNG…	1.80467	0.00511406	0.000854165	0.00277355
GO:0048812~neuron projection morphogenesis	2.13289e-06	5.67103	ABLIM1, ENAH, ADORA2A, CLU, PIP5K1C, EPHB3, CDH4, EPHB2, TGFB2, DMD, BCL2, RAC1, LMTK2, NKX2-1, ETV1, B3GNT2, DCX, BOC, DCLK1, KLK8, EGR2, RTN4R, STXBP1, NR4A2, DPYSL5, NFASC, NTNG2, RPL24, ISL1, CDK5, SLIT2, NUMBL, NTN3, SLITRK2, SEMA6A, NOTCH1, NDEL1, SEMA6C, SEMA4F, DLX5, FOXG1, 6530402F18RIK, DST, CACNA1A, CHL1	2.11651	0.00716633	0.00102692	0.00389057
GO:0031175~neuron projection development	2.41248e-06	5.61754	GPRIN1, ENAH, PIP5K1C, GRIN3A, PRKG1, TGFB2, BOC, EGR2, STXBP1, CDK5, SLIT2, NUMBL, SLITRK2, NDEL1, SEMA4F, RASGRF1, FOXG1, 6530402F18RIK, DST, CHL1, ABLIM1, ADORA2A, CLU, EPHB3, CDH4, EPHB2, LINGO1, DMD, BCL2, RAC1, LMTK2, ETV1, NKX2-1, B3GNT2, DCX, DCLK1, KLK8, RTN4R, NR4A2, DPYSL5, NFASC, NTNG2, RPL24, ISL1, NTN3, SEMA6A, PPP1R9B, NOTCH1, SEMA6C, DLX5, SYNGAP1, CACNA1A	1.98059	0.00810188	0.00101634	0.00440053
GO:0006816~calcium ion transport	7.28265e-06	5.13771	CAV1, TRPV2, CACNB1, GRIN3A, FKBP1B, TPCN1, ATP2B2, ATP2B3, GRIN2B, PKD1, CHRNA4, CAMK2B, CHRNA7, TRPV6, CACNA2D1, SLC8A1, SLC8A2, TRPC3, TRPC5, CACNG8, CACNA1I, GRIN2A, CACNG5, CACNG2, CACNA2D3, CORO1A, ATP2A2, CACNA1G, RYR2, CACNA1C, CACNA1D, CACNA1A, CACNA1B	2.30892	0.0242581	0.00272486	0.0132835
GO:0007242~intracellular signaling cascade	7.9365e-06	5.10037	ADCY2, ADCY8, GNA12, ADCY6, STAT5B, CSPG4, RASGEF1B, IQGAP3, FGF12, PGR, MAP3K5, DIRAS2, CTGF, RAPGEF6, RALB, RAPGEF2, RAPGEF1, PAG1, MAP2K5, RET, RARG, STMN2, BAIAP2, PICK1, SOCS7, PCLO, IRS1, RND3, SSTR2, RASGRF1, ROR2, MAPK9, ARL8A, UNC13B, UNC13A, FGD1, CAV1, PLCXD3, RALGPS1, ADORA2A, PTH1R, AKAP13, ARF5, GMIP, PLCH2, RAC1, RHOBTB2, RHOBTB1, ADRA2B, DYRK2, TEC, MDFI, CNKSR2, DVL3, MAP2K1, MAP…	1.40638	0.0264071	0.00267262	0.0144761
GO:0006812~cation transport	8.84503e-06	5.0533	KCNC2, SLC9A8, KCNC1, SLC36A1, SLC5A5, KCNC4, SLC44A1, KCNC3, ATP1B2, TRPV2, ATP5B, GRIN3A, KCNJ12, KCNIP2, KCNJ11, KCNIP4, ATP2B2, KCNQ4, ATP2B3, KCNK9, KCNQ3, GRIN2B, CHRNA4, SLC22A3, CHRNA7, TRPV6, KCNQ2, ATP5H, KCNG1, ATP5K, ATP5J, TRPM3, CACNG8, SCN2A1, CACNG5, GRIN2A, CACNG2, ATP6V1F, KCNT2, SLC41A3, ATP5C1, RYR2, KCNH7, STEAP2, KCNH3, SLC39A14, CAV1, SLC38A7, FKBP4, KCNA2, CACNB1, ATP5G2, …	1.5617	0.0293852	0.00270774	0.0161331
GO:0048666~neuron development	1.08322e-05	4.96528	GPRIN1, ENAH, PIP5K1C, RORB, GRIN3A, PRKG1, TGFB2, ATP2B2, BOC, RET, EGR2, STXBP1, CDK5, SLIT2, NUMBL, SLITRK2, NDEL1, MIAT, SEMA4F, RASGRF1, 6530402F18RIK, FOXG1, DST, CHL1, ABLIM1, ADORA2A, CLU, EPHB3, CDH4, EPHB2, LINGO1, DMD, BCL2, RAC1, LMTK2, ETV1, NKX2-1, LHX6, B3GNT2, DCX, LHX8, DCLK1, KLK8, HTT, RTN4R, NFASC, NR4A2, DPYSL5, NTNG2, RPL24, SOD1, ISL1, NTN3, SALL3, SEMA6A, PPP1R9B, NOTCH1, …	1.76859	0.0358673	0.00303924	0.0197573
GO:0001505~regulation of neurotransmitter levels	1.66632e-05	4.77824	SYT1, STX1A, NRXN2, NRXN1, PCLO, PARK7, SLC17A7, GRM2, SYN1, TRIM9, SYN2, SLC22A3, ABAT, SV2B, VAMP2, SLC5A7, GAD1, SNAP25, UNC13B, CACNA1A, CACNA1B	2.86753	0.0546394	0.00431289	0.0303912
GO:0048858~cell projection morphogenesis	1.67331e-05	4.77642	ABLIM1, ENAH, ADORA2A, CLU, PIP5K1C, EPHB3, CDH4, EPHB2, TGFB2, DMD, BCL2, RAC1, LMTK2, NKX2-1, ETV1, B3GNT2, DCX, BOC, DCLK1, KLK8, EGR2, RTN4R, RPGRIP1L, STXBP1, NR4A2, DPYSL5, NFASC, NTNG2, RPL24, ISL1, CDK5, DNAIC2, SLIT2, NUMBL, NTN3, SLITRK2, SEMA6A, NOTCH1, NDEL1, SEMA6C, SEMA4F, DLX5, FOXG1, 6530402F18RIK, DST, CACNA1A, CHL1	1.92791	0.0548621	0.0040222	0.0305186
GO:0007409~axonogenesis	2.5663e-05	4.59069	ABLIM1, ENAH, PIP5K1C, EPHB3, CDH4, EPHB2, TGFB2, BCL2, RAC1, LMTK2, NKX2-1, ETV1, B3GNT2, DCX, BOC, DCLK1, EGR2, RTN4R, STXBP1, NR4A2, DPYSL5, NFASC, NTNG2, RPL24, ISL1, CDK5, SLIT2, NUMBL, NTN3, SLITRK2, SEMA6A, NOTCH1, NDEL1, SEMA6C, SEMA4F, DLX5, FOXG1, 6530402F18RIK, DST, CHL1	2.02562	0.0828982	0.00575251	0.0468019
GO:0007269~neurotransmitter secretion	2.92834e-05	4.53338	SYT1, STX1A, NRXN2, NRXN1, PCLO, GRM2, SYN1, TRIM9, SYN2, SV2B, VAMP2, SNAP25, UNC13B, CACNA1A, CACNA1B	3.52752	0.0940263	0.00615256	0.0534027
GO:0048667~cell morphogenesis involved in neuron differentiation	2.96679e-05	4.52771	ABLIM1, ENAH, PIP5K1C, EPHB3, CDH4, EPHB2, TGFB2, ATP2B2, BCL2, RAC1, LMTK2, NKX2-1, ETV1, B3GNT2, DCX, BOC, DCLK1, EGR2, RTN4R, STXBP1, NR4A2, DPYSL5, NFASC, NTNG2, RPL24, SOD1, ISL1, CDK5, SLIT2, NUMBL, NTN3, SLITRK2, SEMA6A, NOTCH1, NDEL1, SEMA6C, SEMA4F, DLX5, FOXG1, 6530402F18RIK, DST, CACNA1A, CHL1	1.9537	0.0952001	0.00586751	0.0541036
GO:0006836~neurotransmitter transport	3.2803e-05	4.48409	SYT1, STX1A, CPLX2, NRXN2, SLC6A15, NRXN1, SLC6A17, PCLO, RIMS1, PARK7, SLC17A7, GRM2, SYN1, SLC6A7, TRIM9, SYN2, SLC6A6, SLC22A3, SV2B, VAMP2, UNC13B, SNAP25, CACNA1A, CACNA1B	2.53981	0.104715	0.00612635	0.0598194
GO:0006811~ion transport	4.281e-05	4.36845	KCNC2, SLC9A8, SLC36A1, KCNC1, KCNC4, SLC44A1, KCNC3, ATP1B2, SLC22A15, GRIN3A, ATP2B2, CTTNBP2, ATP2B3, KCNK9, GRIN2B, GRIN2D, SLC25A22, CHRNA5, CHRNA4, CHRNA7, CLNS1A, SCN2A1, GRIN2A, KCNT2, ATP5C1, RYR2, FXYD1, CAV1, KCNA2, SLC38A7, CACNB1, KCNA5, KCNMB2, TTYH3, KCNS1, SCN9A, SLC31A2, HCN3, GABRD, HCN1, CACNA2D1, ATP5J2, GABRA1, TRPC3, TRPC5, HTT, GABRA3, GABRA5, CACNA1I, CACNA2D3, KCNK3, KCTD…	1.42686	0.134423	0.00756902	0.0780614
GO:0007167~enzyme linked receptor protein signaling pathway	4.42296e-05	4.35429	NOG, PDGFA, LTBP3, BCAR1, LTBP4, STAT5B, CSPG4, TGFB2, CTGF, ANGPT1, PDGFC, INSR, RAPGEF1, EGFR, RET, IRS2, PICK1, SOCS7, PTPRN, CDK5, IRS1, GRB10, DOK4, HIPK2, ROR2, ZFAND5, FUT8, BEX1, KIT, EPHB3, EPHB2, PHIP, IGSF10, IGF1R, RGMB, EPHB6, SOS1, PALM2, LMTK2, SH2B2, AGRN, PIK3R1, PIK3R2, PTPRE, SMAD9, FLT1, SMAD1, KDR, EPHA3, EPHA5, GSK3A, CSRNP1, SYNGAP1, CACNA1A, ARAP1, BMP6	1.73662	0.138556	0.00742954	0.080649
GO:0032940~secretion by cell	5.04468e-05	4.29717	MYO5A, SYT1, CPLX2, NKD2, RAB3D, SRCIN1, LTBP4, USE1, SYT6, ILDR2, FKBP1B, RIMS1, SYN1, BLOC1S3, TRIM9, SYN2, SV2B, SNAP25, APBA1, STX1A, NRXN2, PLEK, HTT, ERP29, STXBP1, SCRN1, NRXN1, PCLO, IRS1, DOC2A, GRM2, CADPS2, STXBP5, LYST, SYTL5, VAMP2, STEAP2, CACNA1C, UNC13B, UNC13A, CACNA1A, CACNA1B	1.91169	0.156429	0.0080678	0.0919805
GO:0032990~cell part morphogenesis	5.88071e-05	4.23057	ABLIM1, ENAH, ADORA2A, CLU, PIP5K1C, EPHB3, CDH4, EPHB2, TGFB2, DMD, BCL2, RAC1, LMTK2, NKX2-1, ETV1, B3GNT2, DCX, BOC, DCLK1, KLK8, EGR2, RTN4R, RPGRIP1L, STXBP1, NR4A2, DPYSL5, NFASC, NTNG2, RPL24, ISL1, CDK5, DNAIC2, SLIT2, NUMBL, NTN3, SLITRK2, SEMA6A, NOTCH1, NDEL1, SEMA6C, SEMA4F, DLX5, FOXG1, 6530402F18RIK, DST, CACNA1A, CHL1	1.83697	0.179879	0.00897329	0.107216
GO:0030001~metal ion transport	9.45417e-05	4.02438	KCNC2, SLC9A8, KCNC1, SLC5A5, KCNC4, KCNC3, ATP1B2, TRPV2, GRIN3A, KCNJ12, KCNIP2, KCNJ11, KCNIP4, ATP2B2, KCNQ4, ATP2B3, KCNK9, KCNQ3, GRIN2B, CHRNA4, CHRNA7, TRPV6, KCNQ2, KCNG1, CACNG8, SCN2A1, CACNG5, GRIN2A, CACNG2, KCNT2, RYR2, KCNH7, STEAP2, KCNH3, SLC39A14, CAV1, FKBP4, KCNA2, SLC38A7, CACNB1, KCNA5, FKBP1B, TPCN1, KCNMB2, KCNS1, SLC4A8, SCN9A, PKD1, CAMK2B, SLC31A2, HCN3, HCN1, CACNA2D1,…	1.53232	0.272986	0.0137657	0.172314
GO:0007155~cell adhesion	9.73125e-05	4.01183	DLC1, CADM3, THRA, ATP1B2, NELL1, LMO7, MEGF10, VCL, TGFB2, CDH22, CTGF, RAPGEF1, PCDHGA12, RET, PCDHGA10, PTPRM, PTPRF, PTPRS, AJAP1, NCAM1, ROR2, DST, ITGAL, NINJ1, NEDD9, TRO, PVRL3, RAC1, EFR3A, SCARB1, SSX2IP, LPP, CELSR2, ITGA4, CELSR1, PCDH17, TMEM8B, FREM2, PKP4, CYFIP2, CFDP1, ANTXR1, NRP2, PCDHA9, CLSTN2, BCAR1, CLSTN1, PCDHGA9, PCDHGA2, DGCR2, PCDH1, PCP4, CNTNAP2, RHOB, ZYX, BOC, COL1…	1.46383	0.279748	0.01358	0.17736
GO:0022610~biological adhesion	0.000101791	3.99229	DLC1, CADM3, THRA, ATP1B2, NELL1, LMO7, MEGF10, VCL, TGFB2, CDH22, CTGF, RAPGEF1, PCDHGA12, RET, PCDHGA10, PTPRM, PTPRF, PTPRS, AJAP1, NCAM1, ROR2, DST, ITGAL, NINJ1, NEDD9, TRO, PVRL3, RAC1, EFR3A, SCARB1, SSX2IP, LPP, CELSR2, ITGA4, CELSR1, PCDH17, TMEM8B, FREM2, PKP4, CYFIP2, CFDP1, ANTXR1, NRP2, PCDHA9, CLSTN2, BCAR1, CLSTN1, PCDHGA9, PCDHGA2, DGCR2, PCDH1, PCP4, CNTNAP2, RHOB, ZYX, BOC, COL1…	1.46122	0.290544	0.0136364	0.185515
GO:0007611~learning or memory	0.00019713	3.70525	FZD9, KLK8, EGR2, HTT, ADCY8, GABRA5, ATP1A3, CTNND2, GRIN2A, AFF2, CDK5, EPHB2, FOXP2, AMPH, GRIN2B, PDE1B, TMOD2, NEUROD2, CHRNA7, SHC3, CACNA1C, SYNGAP1, LHX8, HTR2A	2.28298	0.485617	0.0252446	0.358976
GO:0003001~generation of a signal involved in cell-cell signaling	0.000218795	3.65996	MYO5A, SYT1, STX1A, NRXN2, HTT, LTBP4, ILDR2, NRXN1, IRS1, FKBP1B, PCLO, GRM2, SYN1, TRIM9, SYN2, SV2B, VAMP2, CACNA1C, SNAP25, UNC13B, CACNA1A, APBA1, CACNA1B	2.31808	0.521864	0.0269581	0.398355
GO:0007169~transmembrane receptor protein tyrosine kinase signaling pathway	0.000224174	3.64941	ZFAND5, BCAR1, STAT5B, CSPG4, BEX1, KIT, EPHB3, EPHB2, PHIP, IGSF10, IGF1R, EPHB6, CTGF, SOS1, LMTK2, ANGPT1, SH2B2, PDGFC, AGRN, INSR, RAPGEF1, PIK3R1, PIK3R2, EGFR, IRS2, RET, FLT1, PICK1, SOCS7, IRS1, CDK5, KDR, EPHA3, EPHA5, GRB10, DOK4, GSK3A, CSRNP1, ROR2, SYNGAP1, CACNA1A	1.80785	0.530459	0.0266388	0.408129
GO:0000904~cell morphogenesis involved in differentiation	0.000247388	3.60662	ABLIM1, NOG, ENAH, PIP5K1C, EPHB3, CDH4, EPHB2, TGFB2, ATP2B2, BCL2, RAC1, LMTK2, NKX2-1, ETV1, B3GNT2, DCX, BOC, DCLK1, EGR2, RTN4R, STXBP1, NR4A2, DPYSL5, NFASC, NTNG2, RPL24, SOD1, ISL1, CDK5, SLIT2, NUMBL, NTN3, SLITRK2, SEMA6A, NOTCH1, NDEL1, SEMA6C, SEMA4F, DLX5, FOXG1, 6530402F18RIK, ANTXR1, DST, CACNA1A, CHL1	1.7571	0.56582	0.0283589	0.450302
GO:0034621~cellular macromolecular complex subunit organization	0.000262904	3.5802	EIF6, MTSS1, XPO1, HIST4H4, ENAH, EIF2A, H1FX, CTTNBP2, HIST2H2AB, H2AFZ, H2AFY, HIST3H2A, PDGFC, LSM2, TUBG2, HIST3H2BA, MTERFD3, HIST1H1E, HIST1H1D, HIST1H1C, HIST1H1B, HIST1H1A, PICK1, CDK5, PTRF, TBCA, RPS14, CELF4, WASL, UNC13B, HIST1H4K, SNAP91, HIST1H2AG, FKBP4, CALR, TSPYL1, HIST1H4A, AGRN, HIST1H4H, HIP1, HIST2H3B, SHPRH, MSTO1, HIST1H2BF, CEBPG, RPL24, CENPH, HIST1H2AI, H3F3A, XPO7, SYN…	1.69321	0.587958	0.0291219	0.478482
GO:0016337~cell-cell adhesion	0.000393573	3.40497	CADM3, THRA, PCDHA9, CLSTN2, CLSTN1, PCDHGA9, LMO7, PCDHGA2, TGFB2, CDH22, PCDH1, PCP4, CTGF, COL11A1, RAPGEF1, BOC, PCDHGA12, PCDHGA10, RET, PTPRF, PCDH11X, PCDH8, PCDHGB5, NCAM1, ROR2, NCAN, CHL1, ITGAL, CDH4, DCHS1, CDH6, CDH8, CDH9, FAT4, PVRL3, BCL2, PCDHB17, EFR3A, PKD1, TNXB, PLEK, CELSR2, ITGA4, CELSR1, PCDH17, WNT7B, FREM2, CYFIP2, CDH10	1.68603	0.734832	0.0419152	0.715491
GO:0006163~purine nucleotide metabolic process	0.000439382	3.35716	ADCY2, ADCY8, ATP1B2, ATP5B, ADCY6, LDHD, ATP5G2, RORA, ATP5G1, PFAS, ATP2B2, ATP2B3, GUCY1A2, GUCY1A3, ENTPD1, IMPDH1, ATP5H, IMPDH2, ATP5K, ATP5J, ATP5J2, ATP11B, ATP1A3, AK5, ATP11C, GMPS, ATP6V1F, NME5, NME3, ATP2A2, ATP8A2, ATP5C1, ATP6V0A1, GUCY1B3, GUK1	1.85195	0.7728	0.0452541	0.798453
GO:0006813~potassium ion transport	0.000439382	3.35716	KCNC2, KCNC1, SLC9A8, KCNC4, KCNC3, ATP1B2, KCNA2, KCNA5, KCNIP2, KCNJ12, KCNJ11, KCNIP4, KCNMB2, KCNQ4, KCNS1, KCNK9, KCNQ3, KCNQ2, HCN3, KCNG1, HCN1, SCN2A1, ATP1A3, KCNV1, KCNK3, KCTD8, KCNN1, KCNT2, KCNN2, KCNH7, KCTD18, KCTD15, KCNH3, ABCC8, KCTD12	1.85195	0.7728	0.0452541	0.798453
GO:0015674~di-, tri-valent inorganic cation transport	0.000495166	3.30525	SLC39A14, CAV1, TRPV2, CACNB1, GRIN3A, FKBP1B, TPCN1, ATP2B2, ATP2B3, GRIN2B, PKD1, CHRNA4, CAMK2B, CHRNA7, TRPV6, CACNA2D1, SLC8A1, SLC8A2, TRPC3, TRPC5, CACNG8, CACNA1I, GRIN2A, CACNG5, CACNG2, CACNA2D3, CORO1A, ATP2A2, CACNA1G, RYR2, CACNA1C, STEAP2, CACNA1D, CACNA1A, CACNA1B	1.84044	0.811774	0.0493502	0.899393
GO:0006164~purine nucleotide biosynthetic process	0.000550539	3.25921	ADCY2, ATP1B2, ADCY8, ATP5B, LDHD, ADCY6, ATP5G2, ATP5G1, PFAS, ATP2B2, ATP2B3, GUCY1A2, GUCY1A3, IMPDH1, ATP5H, IMPDH2, ATP5K, ATP5J, ATP5J2, ATP11B, ATP1A3, ATP11C, GMPS, ATP6V1F, NME5, NME3, ATP2A2, ATP8A2, ATP5C1, ATP6V0A1, GUCY1B3	1.91567	0.843848	0.0531509	0.999492
GO:0051899~membrane depolarization	0.000579383	3.23703	CAV1, ADORA2A, GRIN2A, CACNG2, CDK5, GCLM, PARK7, DMPK, GRIN2B, GRIN2D, CACNA1G, CHRNA4, CACNA1A	3.05718	0.858329	0.0543054	1.0516
GO:0046903~secretion	0.000622357	3.20596	MYO5A, SYT1, CPLX2, NKD2, RAB3D, SRCIN1, ADORA2A, LTBP4, USE1, SYT6, ILDR2, FKBP1B, RIMS1, LNPEP, SYN1, BLOC1S3, TRIM9, SYN2, SV2B, SNAP25, APBA1, STX1A, NRXN2, PLEK, HTT, ERP29, STXBP1, SCRN1, NRXN1, PCLO, IRS1, DOC2A, GRM2, CADPS2, STXBP5, LYST, SYTL5, VAMP2, STEAP2, CACNA1C, UNC13B, UNC13A, CACNA1A, CACNA1B	1.68555	0.877451	0.0566446	1.12918
GO:0007610~behavior	0.000623389	3.20524	NRP2, ADCY8, SOBP, CALB1, TGFB2, ATP2B2, GRIN2B, PPP1R1B, GRIN2D, CHRNA4, CHRNA7, SHC3, EGR2, ZDHHC8, GRIN2A, PRKCE, GRM1, DDO, CDK5, SLIT2, GRM2, LYST, HIPK2, ABAT, CHL1, MYO5A, ADORA2A, CTNND2, KIT, AMPH, EPHB2, NPAS1, NPAS2, NPAS3, PDE1B, BCL2, RAC1, SCN9A, APBA2, ETV1, NKX2-1, LHX8, APBA1, FZD9, KLK8, GNAO1, HTT, GABRA5, ATP1A3, NR4A2, AFF2, NPY1R, CELSR1, IDO1, SOD1, PARK7, FOXP2, CORO1A, EP…	1.48417	0.877876	0.0552456	1.13104
GO:0006793~phosphorus metabolic process	0.000712411	3.14727	STK33, CSPG4, PRKG1, PRKX, DMPK, TGFB2, CTTNBP2, MAP3K5, UQCR11, MAP3K9, STK39, INSR, MAP2K5, MATK, EGFR, RET, PTPRM, PTPRF, PTPRG, PTPRN2, PICK1, PTPRS, PTPRN, CDKL2, MARK4, PTPRO, STK4, CDKL4, PPP1CA, ATP5C1, CAMK1, MAPK9, ROR2, MAPK7, KALRN, NRBP2, SSH1, ADRBK2, EPHB3, ACP1, EPHB2, GPD1L, 2810408M09RIK, VRK1, EPHB6, SBK1, 2610018G03RIK, TTBK1, DUSP15, LMTK2, DYRK2, TEC, MDFI, GPD2, PTPN9, MAP2…	1.30999	0.909563	0.0612815	1.29157
GO:0006796~phosphate metabolic process	0.000712411	3.14727	STK33, CSPG4, PRKG1, PRKX, DMPK, TGFB2, CTTNBP2, MAP3K5, UQCR11, MAP3K9, STK39, INSR, MAP2K5, MATK, EGFR, RET, PTPRM, PTPRF, PTPRG, PTPRN2, PICK1, PTPRS, PTPRN, CDKL2, MARK4, PTPRO, STK4, CDKL4, PPP1CA, ATP5C1, CAMK1, MAPK9, ROR2, MAPK7, KALRN, NRBP2, SSH1, ADRBK2, EPHB3, ACP1, EPHB2, GPD1L, 2810408M09RIK, VRK1, EPHB6, SBK1, 2610018G03RIK, TTBK1, DUSP15, LMTK2, DYRK2, TEC, MDFI, GPD2, PTPN9, MAP2…	1.30999	0.909563	0.0612815	1.29157
GO:0034622~cellular macromolecular complex assembly	0.00079902	3.09744	EIF6, MTSS1, XPO1, HIST4H4, HIST1H4K, SNAP91, HIST1H2AG, FKBP4, EIF2A, H1FX, CALR, TSPYL1, CTTNBP2, HIST2H2AB, HIST1H4A, H2AFZ, H2AFY, HIST3H2A, PDGFC, LSM2, AGRN, TUBG2, HIST3H2BA, HIST1H4H, HIP1, HIST2H3B, HIST1H1E, SHPRH, MSTO1, HIST1H1D, HIST1H1C, HIST1H2BF, HIST1H1B, HIST1H1A, PICK1, RPL24, CDK5, TBCA, RPS14, CELF4, HIST1H2AI, H3F3A, XPO7, SYNGAP1, UNC13B, HIST1H3H, CACNA1A	1.6776	0.932483	0.066778	1.44751
GO:0043933~macromolecular complex subunit organization	0.000823456	3.08436	EIF6, XPO1, MTSS1, HIST4H4, ENAH, H1FX, EIF2A, HIST2H2AB, CTTNBP2, APOE, GPX3, H2AFZ, H2AFY, HIST3H2A, PDGFC, LSM2, TUBG2, INSR, HIST3H2BA, MTERFD3, DCTPP1, HIST1H1E, HIST1H1D, HIST1H1C, HIST1H1B, SCUBE1, HIST1H1A, PICK1, CDK5, PTRF, TBCA, RRM2, RPS14, CELF4, ATPIF1, WASL, UNC13B, CAV2, CAV1, HIST1H4K, SNAP91, HIST1H2AG, FKBP4, CALR, TSPYL1, IGF1R, HIST1H4A, NPM1, SCARB1, AGRN, OLFM1, HIST1H4H, H…	1.49944	0.937827	0.0670894	1.49146
GO:0006928~cell motion	0.000823456	3.08436	NRP2, ENAH, PLXNA2, BCAR1, ATP5B, CSPG4, ZEB2, PRKG1, TGFB2, GPX1, CTTNBP2, GAB2, CTGF, CHRNA7, BOC, NR2F1, EGFR, RET, EGR2, MDGA1, CDK5, SLIT2, NDEL1, NAV1, SEMA4F, LYST, FOXG1, CNTN2, CELF3, CHL1, ABLIM1, ZFAND5, FUT8, KIT, EPHB3, CDH4, PEX5L, EPHB2, RAC1, LMTK2, ETV1, NKX2-1, SCARB1, LHX6, B3GNT2, DCX, INPP5B, DCLK1, FLT1, MAP2K1, NFASC, ATP1A3, DPYSL5, NR4A2, RPL24, ITGA4, VAV2, ISL1, KDR, SE…	1.49944	0.937827	0.0670894	1.49146
GO:0007411~axon guidance	0.000867569	3.0617	ABLIM1, ENAH, EGR2, NFASC, DPYSL5, RPL24, ISL1, EPHB3, CDH4, CDK5, SLIT2, EPHB2, TGFB2, SEMA6A, SEMA6C, SEMA4F, RAC1, FOXG1, LMTK2, ETV1, NKX2-1, B3GNT2, BOC, CHL1	2.07332	0.946427	0.068895	1.57076
GO:0055085~transmembrane transport	0.000900387	3.04557	SLC9A8, KCNC1, SLC5A5, KCNC3, SLC45A4, SLC22A15, ATP5B, TRPV2, SLC7A8, SLC7A5, KCNQ4, SLC2A6, KCNQ3, SLC25A22, SLC25A29, SLC22A3, ABCB10, SV2B, TRPV6, KCNQ2, ATP5H, DNAJC19, ATP5K, ATP5J, NUP133, SLC25A5, SLC22A8, ABCC10, CFTR, ATP6V1F, TRAM1L1, ATP5C1, SLC25A38, KCNH7, TOMM22, NUP107, KCNH3, SEC61G, SLC39A14, MRPS17, MFSD6, KCNA2, MFSD4, NUP93, ATP5G2, ATP5G1, CHCHD4, KCNA5, TPCN1, KCNS1, POM121…	1.43555	0.952044	0.0697676	1.62972
GO:0048167~regulation of synaptic plasticity	0.000949994	3.02228	EGR2, ADORA2A, HTT, CTNND2, GRIN2A, STXBP1, RIMS1, CDK5, EPHB2, LNPEP, ATP2B2, YWHAG, GRIN2B, RASGRF1, SYNGAP1	2.64564	0.959437	0.0718228	1.71878
GO:0006979~response to oxidative stress	0.000973012	3.01188	MAP2K1, GATM, CLU, PRDX2, SOD1, GCLM, PARK7, NME5, GPX1, XPA, MTF1, APOE, GPX4, BCL2, GPX3, CYGB, COL1A1, CAT, NQO1, SRXN1, DHCR24, MT3	2.14084	0.962469	0.0718894	1.76007
GO:0007156~homophilic cell adhesion	0.000994123	3.00256	CADM3, PCDHA9, CLSTN2, CLSTN1, PCDHGA9, CDH4, DCHS1, PCDHGA2, CDH6, CDH8, CDH22, PCDH1, CDH9, FAT4, PVRL3, PCDHB17, PCDHGA12, PCDHGA10, RET, PTPRF, PCDH11X, PCDH8, CELSR2, CELSR1, PCDH17, PCDHGB5, FREM2, CHL1, CDH10	1.9537	0.96505	0.0718204	1.79793
GO:0009165~nucleotide biosynthetic process	0.00104367	2.98144	ADCY2, ADCY8, ATP1B2, ATP5B, ADCY6, LDHD, ATP5G2, CTPS2, ATP5G1, PFAS, ATP2B2, ATP2B3, GUCY1A2, GUCY1A3, IMPDH1, ATP5H, IMPDH2, ATP5K, ATP5J, DCTD, ATP5J2, ATP11B, ATP1A3, ATP11C, PRPSAP1, GMPS, ATP6V1F, NME5, UMPS, NME3, ATP2A2, RRM2, ATP8A2, ATP5C1, ATP6V0A1, GUCY1B3	1.7516	0.970433	0.0736893	1.88674
GO:0034728~nucleosome organization	0.00106304	2.97345	HIST2H3B, HIST4H4, HIST1H1E, SHPRH, HIST1H4K, HIST1H1D, HIST1H1C, HIST1H1B, HIST1H2AG, HIST1H2BF, CEBPG, HIST1H1A, H1FX, TSPYL1, HIST2H2AB, HIST1H4A, H2AFZ, HIST1H2AI, H3F3A, H2AFY, HIST3H2A, HIST3H2BA, HIST1H3H, HIST1H4H	2.22791	0.972304	0.0734694	1.92144
GO:0016310~phosphorylation	0.00107788	2.96743	STK33, CSPG4, PRKG1, PRKX, DMPK, TGFB2, CTTNBP2, MAP3K5, UQCR11, MAP3K9, STK39, INSR, MAP2K5, MATK, EGFR, RET, PICK1, CDKL2, MARK4, STK4, CDKL4, ATP5C1, CAMK1, MAPK9, ROR2, MAPK7, NRBP2, KALRN, ADRBK2, EPHB3, EPHB2, 2810408M09RIK, VRK1, EPHB6, SBK1, 2610018G03RIK, TTBK1, LMTK2, DYRK2, TEC, MDFI, MAP2K1, MAP2K4, KDR, EPHA3, EPHA5, TRP53RK, PLK2, MTOR, CDC42BPB, NUAK1, ATP5B, PRDX2, EIF2A, LATS2, P…	1.3324	0.973658	0.0729634	1.94802
GO:0000902~cell morphogenesis	0.00114889	2.93972	ENAH, NOG, PIP5K1C, TGFB2, ATP2B2, BOC, EGFR, EGR2, STXBP1, ECT2, STK4, DNAIC2, CDK5, SLIT2, NUMBL, SLITRK2, NDEL1, SEMA4F, 6530402F18RIK, FOXG1, DST, CHL1, ABLIM1, SHROOM3, ADORA2A, CLU, EPHB3, CDH4, EPHB2, DMD, BCL2, RAC1, LMTK2, ETV1, NKX2-1, BCL6, B3GNT2, DCX, DCLK1, KLK8, RTN4R, RPGRIP1L, NR4A2, DPYSL5, NFASC, NTNG2, RPL24, SOD1, ISL1, NTN3, SEMA6A, NOTCH1, SEMA6C, SYNE2, DLX5, ANTXR1, CACNA…	1.5343	0.979272	0.0760594	2.07507
GO:0015672~monovalent inorganic cation transport	0.00123075	2.90983	KCNC2, SLC36A1, KCNC1, SLC9A8, SLC5A5, KCNC4, KCNC3, ATP1B2, ATP5B, KCNIP2, KCNJ12, KCNJ11, KCNIP4, KCNQ4, KCNK9, KCNQ3, KCNQ2, ATP5H, ATP5K, KCNG1, ATP5J, SCN2A1, ATP6V1F, KCNT2, ATP5C1, KCNH7, KCNH3, KCNA2, SLC38A7, ATP5G2, KCNA5, ATP5G1, KCNMB2, KCNS1, SLC4A8, SCN9A, HCN3, HCN1, ATP5J2, SLC8A1, ATP1A3, KCNK3, KCNV1, SLC17A7, KCTD8, SLC4A10, KCNN1, KCNN2, ATP6V0A1, KCTD18, KCTD15, SCN8A, SLC5A7…	1.53674	0.984277	0.0796975	2.22136
GO:0009150~purine ribonucleotide metabolic process	0.00129252	2.88856	ATP1B2, ATP5B, LDHD, ATP5G2, ATP5G1, PFAS, ATP2B2, ATP2B3, ENTPD1, IMPDH1, ATP5H, IMPDH2, ATP5K, ATP5J, ATP5J2, ATP11B, ATP1A3, AK5, ATP11C, GMPS, ATP6V1F, NME5, NME3, ATP2A2, ATP5C1, ATP8A2, ATP6V0A1	1.92087	0.987237	0.0819591	2.33161
GO:0042391~regulation of membrane potential	0.00129252	2.88856	MYO5A, CAV1, ADORA2A, KCNA5, PEX5L, GCLM, DMPK, GRIN2B, GRIN2D, BCL2, SLC1A6, CHRNA4, CHRNA7, POU3F1, OLIG2, SCD2, EGR2, HTT, CACNA1I, GRIN2A, CACNG2, SOD1, CDK5, PARK7, NAB1, CACNA1G, CACNA1A	1.92087	0.987237	0.0819591	2.33161
GO:0016192~vesicle-mediated transport	0.00130842	2.88325	CLTB, LDLR, SRCIN1, HIP1R, USE1, SYT6, NBEA, MEGF10, HOOK1, GOLGA7, CTTN, AP1S2, TRIM9, SNPH, RHOB, CHRNA7, RAB6B, SV2B, SEC24D, COX16, STX1A, STXBP1, SPIRE1, PCLO, NPC1, DOC2A, LRP10, FNBP1L, STXBP5, LRP11, TRAPPC5, SORT1, VAMP2, STEAP2, STX5A, UNC13B, COPE, TRAPPC10, SH3GL2, EPN1, UNC13A, MYO5A, PACS1, ARFGAP2, CAV2, ABCA7, CPLX2, CAV1, NKD2, SNAP91, RAB3D, ARF5, RIMS1, AMPH, RAC1, SCARB1, EHD1…	1.41706	0.987904	0.0813971	2.35997
GO:0031644~regulation of neurological system process	0.0013164	2.88061	ADORA2A, CTNND2, RIMS1, EPHB2, LNPEP, ATP2B2, GRIN2B, GRIN2D, CHRNA7, KLK8, STX1A, EGR2, HTT, GRIN2A, STXBP1, NLGN2, CELSR1, CDK5, GRM1, YWHAG, GRM2, RASGRF1, USP46, SYNGAP1, CACNA1A, HTR2A	1.94794	0.988226	0.0803925	2.37421
GO:0009152~purine ribonucleotide biosynthetic process	0.00133344	2.87503	ATP1B2, ATP5B, LDHD, ATP5G2, ATP5G1, PFAS, ATP2B2, ATP2B3, IMPDH1, ATP5H, IMPDH2, ATP5K, ATP5J, ATP5J2, ATP11B, ATP1A3, ATP11C, GMPS, ATP6V1F, NME5, NME3, ATP2A2, ATP5C1, ATP8A2, ATP6V0A1	1.97805	0.988884	0.0799446	2.40458
GO:0006323~DNA packaging	0.00134213	2.87221	HIST4H4, HIST1H4K, HIST1H2AG, H1FX, TSPYL1, HIST2H2AB, HIST1H4A, H2AFZ, H2AFY, HIST3H2A, HIST3H2BA, TOP2A, HIST1H4H, HIST2H3B, HIST1H1E, SHPRH, HIST1H1D, HIST1H1C, HIST1H1B, HIST1H2BF, AIFM1, HIST1H1A, NUSAP1, SMC4, CHMP1A, HIST1H2AI, H3F3A, HIST1H3H	2.01173	0.989205	0.0790411	2.42007
GO:0008016~regulation of heart contraction	0.00147325	2.83172	SLC8A1, THRA, GNAO1, NOS1, MYH6, FKBP1B, TGFB2, DMPK, HDAC4, ATP2A2, SP4, CACNA1G, RYR2, CHRNA7, CACNA1B	2.53981	0.993067	0.0849493	2.6535
GO:0006334~nucleosome assembly	0.00168515	2.77336	HIST2H3B, HIST4H4, HIST1H1E, SHPRH, HIST1H4K, HIST1H1D, HIST1H1C, HIST1H1B, HIST1H2AG, HIST1H2BF, HIST1H1A, H1FX, TSPYL1, HIST2H2AB, HIST1H4A, H2AFZ, HIST1H2AI, H3F3A, H2AFY, HIST3H2A, HIST3H2BA, HIST1H3H, HIST1H4H	2.20349	0.996611	0.0949582	3.02965
GO:0034654~nucleobase, nucleoside, nucleotide and nucleic acid biosynthetic process	0.0017453	2.75813	ADCY2, ADCY8, ATP1B2, ATP5B, ADCY6, LDHD, ATP5G2, CTPS2, ATP5G1, PFAS, ATP2B2, ATP2B3, GUCY1A2, GUCY1A3, IMPDH1, ATP5H, IMPDH2, ATP5K, ATP5J, DCTD, ATP5J2, ATP11B, ATP1A3, ATP11C, PRPSAP1, GMPS, ATP6V1F, NME5, UMPS, NME3, ATP2A2, RRM2, ATP8A2, ATP5C1, ATP6V0A1, GUCY1B3	1.70267	0.997234	0.0965702	3.13617
GO:0034404~nucleobase, nucleoside and nucleotide biosynthetic process	0.0017453	2.75813	ADCY2, ADCY8, ATP1B2, ATP5B, ADCY6, LDHD, ATP5G2, CTPS2, ATP5G1, PFAS, ATP2B2, ATP2B3, GUCY1A2, GUCY1A3, IMPDH1, ATP5H, IMPDH2, ATP5K, ATP5J, DCTD, ATP5J2, ATP11B, ATP1A3, ATP11C, PRPSAP1, GMPS, ATP6V1F, NME5, UMPS, NME3, ATP2A2, RRM2, ATP8A2, ATP5C1, ATP6V0A1, GUCY1B3	1.70267	0.997234	0.0965702	3.13617
GO:0010035~response to inorganic substance	0.00206383	2.68533	CAV1, D2HGDH, GATM, HTT, NR4A2, PRDX2, SOD1, PARK7, MNAT1, NME5, GPX1, NPC1, MTF1, PDE1C, GPX4, BCL2, GPX3, CACNA1G, MAPK9, COL1A1, CAT, MT3	2.02449	0.999057	0.111371	3.69842
GO:0065003~macromolecular complex assembly	0.00207482	2.68302	EIF6, MTSS1, XPO1, HIST4H4, EIF2A, H1FX, HIST2H2AB, CTTNBP2, GPX3, H2AFZ, H2AFY, HIST3H2A, PDGFC, LSM2, TUBG2, INSR, HIST3H2BA, DCTPP1, HIST1H1E, HIST1H1D, HIST1H1C, HIST1H1B, SCUBE1, HIST1H1A, PICK1, CDK5, PTRF, TBCA, RPS14, RRM2, CELF4, ATPIF1, WASL, UNC13B, CAV2, CAV1, HIST1H4K, SNAP91, HIST1H2AG, FKBP4, CALR, TSPYL1, IGF1R, HIST1H4A, NPM1, AGRN, OLFM1, HIST1H4H, HIP1, HIST2H3B, MSTO1, SHPRH, …	1.4778	0.999091	0.110171	3.71776
GO:0009260~ribonucleotide biosynthetic process	0.0022562	2.64662	ATP1B2, ATP5B, LDHD, ATP5G2, ATP5G1, PFAS, ATP2B2, ATP2B3, IMPDH1, ATP5H, IMPDH2, ATP5K, ATP5J, ATP5J2, ATP11B, ATP1A3, ATP11C, GMPS, ATP6V1F, NME5, NME3, ATP2A2, ATP5C1, ATP8A2, ATP6V0A1	1.90677	0.999508	0.11738	4.03648
GO:0031497~chromatin assembly	0.00233061	2.63253	HIST2H3B, HIST4H4, HIST1H1E, SHPRH, HIST1H4K, HIST1H1D, HIST1H1C, HIST1H1B, HIST1H2AG, HIST1H2BF, HIST1H1A, H1FX, TSPYL1, HIST2H2AB, HIST1H4A, H2AFZ, HIST1H2AI, H3F3A, H2AFY, HIST3H2A, HIST3H2BA, HIST1H3H, HIST1H4H	2.14473	0.999617	0.119181	4.16695
GO:0050804~regulation of synaptic transmission	0.00268377	2.57126	STX1A, EGR2, ADORA2A, HTT, STXBP1, CTNND2, GRIN2A, NLGN2, CELSR1, RIMS1, CDK5, EPHB2, LNPEP, ATP2B2, YWHAG, GRM2, GRIN2B, RASGRF1, USP46, CHRNA7, SYNGAP1, CACNA1A, HTR2A	1.94719	0.999884	0.133972	4.78386
GO:0009259~ribonucleotide metabolic process	0.00269303	2.56976	ATP1B2, ATP5B, LDHD, ATP5G2, ATP5G1, PFAS, ATP2B2, ATP2B3, ENTPD1, IMPDH1, ATP5H, IMPDH2, ATP5K, ATP5J, ATP5J2, ATP11B, ATP1A3, AK5, ATP11C, GMPS, ATP6V1F, NME5, NME3, ATP2A2, ATP5C1, ATP8A2, ATP6V0A1	1.82867	0.999888	0.132448	4.79998
GO:0030182~neuron differentiation	0.00272348	2.56488	GPRIN1, ENAH, PIP5K1C, RORB, GRIN3A, RORA, PRKG1, TGFB2, ATP2B2, OLIG2, BOC, RET, EGR2, STXBP1, DLL1, CDK5, SLIT2, NUMBL, SLITRK2, NDEL1, MIAT, RASGRF1, SEMA4F, 6530402F18RIK, FOXG1, DST, CHL1, ABLIM1, ADORA2A, CLU, SOX2, EPHB3, CDH4, EPHB2, LINGO1, DMD, BCL2, RAC1, LMTK2, ETV1, NKX2-1, LHX6, B3GNT2, DCX, LHX8, DCLK1, KLK8, MAP2K1, HTT, RTN4R, NFASC, DPYSL5, NR4A2, NTNG2, RPL24, ISL1, SOD1, NTN3,…	1.42162	0.999899	0.131926	4.853
GO:0065004~protein-DNA complex assembly	0.00272399	2.56479	HIST2H3B, HIST4H4, HIST1H1E, SHPRH, HIST1H4K, HIST1H1D, HIST1H1C, HIST1H1B, HIST1H2AG, HIST1H2BF, HIST1H1A, H1FX, TSPYL1, HIST2H2AB, HIST1H4A, H2AFZ, HIST1H2AI, H3F3A, H2AFY, HIST3H2A, HIST3H2BA, HIST1H3H, HIST1H4H	2.11651	0.999899	0.130086	4.85389
GO:0010959~regulation of metal ion transport	0.00297295	2.52681	CACNA2D1, CAV1, SLC8A1, SGK1, NOS1, ADORA2A, KCNA5, FKBP1B, DMPK, ATP2B2, NEDD4, BCL2, RYR2, HTR2A	2.46926	0.999956	0.13916	5.28623
GO:0051969~regulation of transmission of nerve impulse	0.00298041	2.52572	KLK8, STX1A, EGR2, ADORA2A, HTT, STXBP1, CTNND2, GRIN2A, NLGN2, CELSR1, RIMS1, CDK5, EPHB2, LNPEP, ATP2B2, YWHAG, GRM2, GRIN2B, RASGRF1, USP46, CHRNA7, SYNGAP1, CACNA1A, HTR2A	1.89893	0.999957	0.137581	5.29914
GO:0009205~purine ribonucleoside triphosphate metabolic process	0.00305739	2.51465	ATP5J2, ATP1B2, ATP5B, LDHD, ATP1A3, ATP11B, ATP5G2, AK5, ATP11C, ATP5G1, ATP6V1F, NME5, ATP2B2, ATP2B3, NME3, ATP2A2, ATP8A2, ATP5C1, ATP6V0A1, ENTPD1, ATP5H, ATP5K, ATP5J	1.92791	0.999967	0.138984	5.43243
GO:0043434~response to peptide hormone stimulus	0.00311953	2.50591	IRS2, SGK1, WDTC1, EGR2, GATM, BCAR1, STAT5B, SOCS7, CFTR, IRS1, PHIP, CTTNBP2, HMGCS2, GSK3A, BCL2, SORT1, SH2B2, MTOR, COL1A1, INSR, PIK3R1, PIK3R2	1.96056	0.999973	0.139728	5.5399
GO:0009199~ribonucleoside triphosphate metabolic process	0.00347376	2.4592	ATP5J2, ATP1B2, ATP5B, LDHD, ATP1A3, ATP11B, ATP5G2, AK5, ATP11C, ATP5G1, ATP6V1F, NME5, ATP2B2, ATP2B3, NME3, ATP2A2, ATP8A2, ATP5C1, ATP6V0A1, ENTPD1, ATP5H, ATP5K, ATP5J	1.90901	0.999992	0.152332	6.15029
GO:0050808~synapse organization	0.00361763	2.44158	MYO5A, KLK8, NRXN2, TNC, UTRN, NFASC, NLGN2, CACNG2, NRXN1, ATP2B2, WNT7B, P2RX2, AGRN, CACNA1A	2.41887	0.999995	0.15611	6.39714
GO:0046034~ATP metabolic process	0.0036254	2.44064	ATP5J2, ATP1B2, ATP5B, LDHD, ATP1A3, ATP11B, ATP5G2, AK5, ATP11C, ATP5G1, ATP6V1F, ATP2B2, ATP2B3, ATP2A2, ATP8A2, ATP5C1, ATP6V0A1, ENTPD1, ATP5H, ATP5K, ATP5J	1.97541	0.999995	0.15445	6.41045
GO:0021954~central nervous system neuron development	0.00365334	2.43731	LINGO1, NDEL1, FOXG1, NR4A2, LHX6, EPHB3, LHX8, DCX, CDK5, DCLK1, EPHB2	2.82201	0.999996	0.153613	6.45831
GO:0008286~insulin receptor signaling pathway	0.00369981	2.43182	PHIP, IRS2, GSK3A, BCAR1, SOCS7, SH2B2, INSR, IRS1, PIK3R1, PIK3R2	3.02359	0.999996	0.153506	6.53787
GO:0010876~lipid localization	0.00377997	2.42251	ABCA7, CAV1, LDLR, STAT5B, APOE, OSBPL1A, SCARB1, B4GALNT1, OSBPL5, OSBP2, OSBPL6, OSBPL7, ATP11B, CFTR, ATP11C, SIGMAR1, ABCG4, NRIP1, NPC1, NPC2, LRP10, NOLC1, ATP8A2, OSBPL10, SLC27A2, SCP2, VLDLR	1.78581	0.999997	0.154671	6.67494
GO:0006887~exocytosis	0.00429214	2.36733	MYO5A, STX1A, CPLX2, NKD2, PLEK, SRCIN1, RAB3D, STXBP1, SCRN1, SYT6, PCLO, RIMS1, DOC2A, CADPS2, STXBP5, TRIM9, SYTL5, SV2B, VAMP2, CACNA1C, STEAP2, UNC13B, UNC13A, CACNA1A	1.84714	0.999999	0.171689	7.54627
GO:0015837~amine transport	0.00472075	2.32599	SLC36A1, SLC44A1, HTT, SLC38A7, PICK1, SLC7A8, XK, SLC7A5, PARK7, SLC6A7, SLC7A3, SLC7A2, SLC7A1, SLC1A6, SLC25A22, SLC6A6, SLC22A3, SLC5A7, CACNA1A, APBA1, SLC46A1	1.93247	1	0.184998	8.26953
GO:0042542~response to hydrogen peroxide	0.00477354	2.32116	GPX1, GPX4, BCL2, GPX3, PRDX2, COL1A1, CAT, SOD1, PARK7	3.17477	1	0.184733	8.35825
GO:0048489~synaptic vesicle transport	0.00481204	2.31767	STX1A, TRIM9, DENND1A, STXBP1, SV2B, VAMP2, UNC13B, PCLO, UNC13A, AMPH	2.91933	1	0.18398	8.42289
GO:0009719~response to endogenous stimulus	0.0051598	2.28737	GPR83, ME1, HMGB2, CAV1, ADORA2A, BCAR1, STAT5B, LATS2, LNPEP, PHIP, CTTNBP2, BCL2, SH2B2, INSR, PIK3R1, PIK3R2, BCKDHA, IRS2, SGK1, WDTC1, EGR2, MAP2K1, GATM, SNRPN, NR4A2, GRIN2A, SOCS7, CFTR, IRS1, HMGCS2, GSK3A, SORT1, MTOR, COL1A1, STEAP2	1.61039	1	0.193746	9.00487
GO:0009201~ribonucleoside triphosphate biosynthetic process	0.00536324	2.27057	ATP5J2, ATP1B2, ATP5B, LDHD, ATP1A3, ATP11B, ATP5G2, ATP11C, ATP5G1, ATP6V1F, NME5, ATP2B2, ATP2B3, NME3, ATP2A2, ATP8A2, ATP5C1, ATP6V0A1, ATP5H, ATP5K, ATP5J	1.91169	1	0.198396	9.34369
GO:0009206~purine ribonucleoside triphosphate biosynthetic process	0.00536324	2.27057	ATP5J2, ATP1B2, ATP5B, LDHD, ATP1A3, ATP11B, ATP5G2, ATP11C, ATP5G1, ATP6V1F, NME5, ATP2B2, ATP2B3, NME3, ATP2A2, ATP8A2, ATP5C1, ATP6V0A1, ATP5H, ATP5K, ATP5J	1.91169	1	0.198396	9.34369
GO:0006468~protein amino acid phosphorylation	0.00547462	2.26165	STK33, CSPG4, PRKG1, PRKX, TGFB2, DMPK, CTTNBP2, MAP3K5, MAP3K9, STK39, INSR, MATK, MAP2K5, EGFR, RET, PICK1, CDKL2, MARK4, STK4, CDKL4, CAMK1, MAPK9, ROR2, MAPK7, NRBP2, KALRN, ADRBK2, EPHB3, EPHB2, 2810408M09RIK, EPHB6, VRK1, 2610018G03RIK, SBK1, TTBK1, LMTK2, DYRK2, TEC, MDFI, MAP2K1, MAP2K4, KDR, EPHA3, EPHA5, TRP53RK, PLK2, MTOR, CDC42BPB, NUAK1, PRDX2, EIF2A, LATS2, PAK7, SLK, PAK3, EEF2K, …	1.29636	1	0.199906	9.5287
GO:0007612~learning	0.00549448	2.26007	HTT, GABRA5, ATP1A3, CTNND2, GRIN2A, CDK5, EPHB2, AMPH, FOXP2, GRIN2B, PDE1B, NEUROD2, CHRNA7, SYNGAP1, CACNA1C	2.22791	1	0.198421	9.56165
GO:0009144~purine nucleoside triphosphate metabolic process	0.0056434	2.24846	ATP5J2, ATP1B2, ATP5B, LDHD, ATP1A3, ATP11B, ATP5G2, AK5, ATP11C, ATP5G1, ATP6V1F, NME5, ATP2B2, ATP2B3, NME3, ATP2A2, ATP8A2, ATP5C1, ATP6V0A1, ENTPD1, ATP5H, ATP5K, ATP5J	1.83697	1	0.201093	9.80836
GO:0009725~response to hormone stimulus	0.00573278	2.24163	GPR83, ME1, HMGB2, CAV1, BCAR1, STAT5B, LATS2, LNPEP, PHIP, CTTNBP2, BCL2, SH2B2, INSR, PIK3R1, PIK3R2, BCKDHA, IRS2, SGK1, WDTC1, EGR2, MAP2K1, GATM, SNRPN, SOCS7, CFTR, IRS1, HMGCS2, GSK3A, SORT1, MTOR, COL1A1, STEAP2	1.6419	1	0.201823	9.95612
GO:0006397~mRNA processing	0.00606591	2.2171	SCAF1, RALY, NCBP1, NHP2L1, PPIL1, LSM7, KIN, WBP4, SF3B3, NONO, HNRNPM, SF3B1, MOV10, GPX4, TARDBP, DHX15, LSM5, U2AF1, LSM4, HNRNPC, SNRNP35, LSM2, SNRNP70, LUC7L3, NOVA1, CSDC2, SNRPA1, ADARB1, ADARB2, HNRNPA2B1, RNPS1, DDX5, EIF4A3, PAPOLA, CELF4, ERN1, SYF2, CELF3, LSM11, RBM38, SNRNP40, CPSF3, HNRNPH1, SNRPE, TXNL4A, SNRPG	1.4864	1	0.210079	10.5049
GO:0009145~purine nucleoside triphosphate biosynthetic process	0.00607591	2.21639	ATP5J2, ATP1B2, ATP5B, LDHD, ATP1A3, ATP11B, ATP5G2, ATP11C, ATP5G1, ATP6V1F, NME5, ATP2B2, ATP2B3, NME3, ATP2A2, ATP8A2, ATP5C1, ATP6V0A1, ATP5H, ATP5K, ATP5J	1.89135	1	0.208265	10.5213
GO:0060284~regulation of cell development	0.00610672	2.21419	RTN4, NOG, SOX2, BEX1, CDH4, MEIS1, EPHB2, LINGO1, METRN, MAPT, BCL2, VWC2, AGRN, BOC, MT3, KLK8, DLL1, ISL1, HDAC4, MIB1, NOTCH1, YWHAG, SERPINF1, SEMA4F, BTG1, FOXG1, ID4, SEMA4D, HDAC9, SYNGAP1, CACNA1A	1.65061	1	0.207116	10.5719
GO:0007010~cytoskeleton organization	0.00611127	2.21387	DLC1, MTSS1, ENAH, PDGFA, BCAR1, RHOU, HOOK1, CTTNBP2, MAPT, PPP4C, FMNL2, KIF11, NUSAP1, TMSB10, MYH6, MARK4, PCLO, TACC2, MAST1, NDEL1, NAV1, LIMCH1, FLII, WASL, DST, DBN1, ABLIM1, FGD1, PALM, SHROOM3, HAUS1, CALR, SPC25, PRR5, TEKT1, BCL2, RAC1, NPM1, PALM2, SH2B2, BCL6, CNN2, TEKT4, SYNPO, TNXB, CENPE, CEP63, RACGAP1, SOD1, PPP1R9B, CORO1A, EPB4.1L1, EPS8, ANTXR1, CDC42BPB	1.42832	1	0.205205	10.5793
GO:0006754~ATP biosynthetic process	0.00641809	2.19259	ATP5J2, ATP1B2, ATP5B, LDHD, ATP1A3, ATP11B, ATP5G2, ATP11C, ATP5G1, ATP6V1F, ATP2B2, ATP2B3, ATP2A2, ATP8A2, ATP5C1, ATP6V0A1, ATP5H, ATP5K, ATP5J	1.96164	1	0.212261	11.0815
GO:0006937~regulation of muscle contraction	0.00656631	2.18268	HDAC4, CAV1, CHRM3, ATP2A2, CACNA1G, GUCY1A3, RYR2, SOD1, CASQ1, FKBP1B, CASQ2, DMPK	2.47787	1	0.214522	11.3232
GO:0009142~nucleoside triphosphate biosynthetic process	0.00686428	2.16341	ATP5J2, ATP1B2, ATP5B, LDHD, ATP1A3, ATP11B, ATP5G2, ATP11C, ATP5G1, ATP6V1F, NME5, ATP2B2, ATP2B3, NME3, ATP2A2, ATP8A2, ATP5C1, ATP6V0A1, ATP5H, ATP5K, ATP5J	1.87144	1	0.221	11.8071
GO:0019725~cellular homeostasis	0.00715899	2.14515	SLC9A8, CLSTN1, DNAJC10, PRDX2, DMPK, ATP2B2, GRIN2B, APOE, SLC1A6, GRIN2D, CHRNA4, CHRNA7, OLIG2, MT3, CLNS1A, SGK1, EGR2, AIFM1, GRIN2A, CACNG2, CDK5, NAB1, RYR2, STC1, GPR12, MYO5A, CAV1, GLRX5, ADORA2A, PTH1R, NHLRC2, TTC7, KCNA5, GCLM, FKBP1B, PEX5L, DMD, BCL2, NPM1, POU3F1, APEX1, WDTC1, SLC8A1, SCD2, HTT, CACNA1I, ATP1A3, SOD1, PARK7, LARGE, ATP2A2, TXNDC16, AVPR1A, CACNA1G, EPOR, CACNA1C,…	1.40689	1	0.227199	12.2833
GO:0000302~response to reactive oxygen species	0.00722208	2.14134	NME5, GPX1, GPX4, BCL2, GPX3, PRDX2, COL1A1, CAT, SOD1, PARK7, MT3	2.58685	1	0.226845	12.3849
GO:0045664~regulation of neuron differentiation	0.00741655	2.1298	RTN4, KLK8, SOX2, BEX1, DLL1, ISL1, CDH4, MEIS1, EPHB2, MIB1, YWHAG, NOTCH1, METRN, SEMA4F, BCL2, MAPT, FOXG1, VWC2, ID4, SEMA4D, SYNGAP1, CACNA1A	1.82601	1	0.230087	12.6974
GO:0009141~nucleoside triphosphate metabolic process	0.00753022	2.12319	ATP5J2, ATP1B2, ATP5B, LDHD, ATP1A3, ATP11B, ATP5G2, AK5, ATP11C, ATP5G1, ATP6V1F, NME5, ATP2B2, ATP2B3, NME3, ATP2A2, ATP8A2, ATP5C1, ATP6V0A1, ENTPD3, ENTPD1, ATP5H, ATP5K, ATP5J	1.76683	1	0.231076	12.8796
GO:0032868~response to insulin stimulus	0.00758834	2.11985	SGK1, WDTC1, IRS2, EGR2, BCAR1, SOCS7, IRS1, PHIP, GSK3A, SORT1, SH2B2, MTOR, INSR, PIK3R1, PIK3R2	2.15238	1	0.230563	12.9726
GO:0016050~vesicle organization	0.00779795	2.10802	SNAP91, BLOC1S3, BCL2, LYST, SNPH, STXBP1, SORT1, DTNBP1, UNC13A, HIP1	2.73098	1	0.234054	13.3073
GO:0021953~central nervous system neuron differentiation	0.00796839	2.09863	LINGO1, NDEL1, FOXG1, NR4A2, LHX6, EPHB3, LHX8, DCX, CDK5, CACNA1A, DCLK1, EPHB2	2.41887	1	0.236445	13.5786
GO:0044271~nitrogen compound biosynthetic process	0.00818118	2.08718	ADCY2, ADCY8, ATP1B2, ATP5B, ADCY6, LDHD, RORA, MTHFD1L, TGFB2, ATP2B2, ATP2B3, GUCY1A2, GUCY1A3, CHRNA7, IMPDH1, ATP5H, IMPDH2, ATP5K, ATP5J, HMBS, GMPS, ATP6V1F, NME5, UMPS, NME3, RRM2, ATP5C1, GUCY1B3, NFS1, ATP5G2, RSAD1, CTPS2, ATP5G1, PFAS, ARG2, DCTD, ODC1, ATP5J2, MOCS3, NOS1, HTT, NR4A2, ATP1A3, ATP11B, ATP11C, PRPSAP1, ATP2A2, SLC7A2, ATP8A2, ATP6V0A1, SLC5A7	1.4297	1	0.239867	13.9161
GO:0045471~response to ethanol	0.00819004	2.08671	NOS1, GRIN2B, EPS8, APOE, BCL2, GRIN2A, CHRNA7, SOD1	3.22516	1	0.238045	13.9301
GO:0030029~actin filament-based process	0.00829637	2.08111	MYO5A, DLC1, MTSS1, ENAH, SHROOM3, PDGFA, BCAR1, CALR, RHOU, CTTNBP2, PRR5, BCL2, RAC1, PALM2, SH2B2, BCL6, CNN2, FMNL2, TNXB, TMSB10, MYH6, RACGAP1, PPP1R9B, MYRIP, CORO1A, EPB4.1L1, EPS8, LIMCH1, FLII, ANTXR1, WASL, DBN1, CDC42BPB	1.58738	1	0.238708	14.0983
GO:0043062~extracellular structure organization	0.00832947	2.07938	MYO5A, TNC, MMP9, ADAMTSL4, UTRN, VIT, TGFB2, ATP2B2, SMOC2, SMOC1, TNR, AGRN, COL11A1, KLK8, TNXB, LGALS3, NRXN2, ADAMTS20, NFASC, NLGN2, CACNG2, NRXN1, ANXA2, WNT7B, FBLN1, COL19A1, P2RX2, ADAMTS2, CACNA1A	1.64775	1	0.237535	14.1506
GO:0033555~multicellular organismal response to stress	0.00887288	2.05194	GRM2, GRIN2B, PENK, BCL2, P2RX2, GABRA5, NEUROD2, ADRA2A, SCN9A, IDO1, CACNA1A	2.51693	1	0.248901	15.0046
GO:0055082~cellular chemical homeostasis	0.00912362	2.03983	MYO5A, SLC9A8, CAV1, ADORA2A, PTH1R, CLSTN1, TTC7, KCNA5, FKBP1B, GCLM, PEX5L, DMPK, ATP2B2, GRIN2B, APOE, SLC1A6, GRIN2D, BCL2, CHRNA4, CHRNA7, OLIG2, POU3F1, MT3, WDTC1, SLC8A1, SGK1, SCD2, EGR2, HTT, CACNA1I, GRIN2A, ATP1A3, CACNG2, SOD1, CDK5, PARK7, ATP2A2, NAB1, AVPR1A, CACNA1G, RYR2, STC1, EPOR, CACNA1C, GPR12, CACNA1A	1.45313	1	0.252908	15.396
GO:0033674~positive regulation of kinase activity	0.00913836	2.03913	ADORA2A, CSPG4, ZEB2, PRDX2, KIT, MAP3K5, DGKG, NPM1, RAC1, PDGFC, AGK, MAPKBP1, MDFI, MAP2K1, PICK1, CENPE, SOD1, VAV2, CDK5, IRS1, GRM1, ERN1, DGKZ, LRP8, HTR2A, VLDLR	1.69321	1	0.25122	15.419
GO:0006873~cellular ion homeostasis	0.00918723	2.03682	MYO5A, SLC9A8, CAV1, ADORA2A, PTH1R, CLSTN1, TTC7, KCNA5, GCLM, FKBP1B, PEX5L, DMPK, ATP2B2, GRIN2B, APOE, SLC1A6, GRIN2D, BCL2, CHRNA4, CHRNA7, OLIG2, POU3F1, MT3, SLC8A1, SGK1, SCD2, EGR2, HTT, CACNA1I, GRIN2A, ATP1A3, CACNG2, SOD1, CDK5, PARK7, ATP2A2, NAB1, AVPR1A, CACNA1G, RYR2, STC1, EPOR, CACNA1C, GPR12, CACNA1A	1.45966	1	0.250367	15.495
GO:0016477~cell migration	0.00932526	2.03034	NRP2, ZFAND5, FUT8, PLXNA2, ATP5B, BCAR1, CSPG4, ZEB2, KIT, PRKG1, PEX5L, TGFB2, CTTNBP2, GPX1, GAB2, CTGF, RAC1, NKX2-1, SCARB1, LHX6, DCX, DCLK1, NR2F1, EGFR, RET, FLT1, MDGA1, NR4A2, ITGA4, VAV2, ISL1, CDK5, KDR, CORO1A, NDEL1, SYNE2, NAV1, LYST, CNTN2, LRP8, CHL1, LRP5	1.48156	1	0.251615	15.7095
GO:0032869~cellular response to insulin stimulus	0.00959221	2.01808	PHIP, WDTC1, SGK1, IRS2, GSK3A, BCAR1, SOCS7, SH2B2, INSR, IRS1, PIK3R1, PIK3R2	2.36262	1	0.255814	16.1229
GO:0030036~actin cytoskeleton organization	0.0103481	1.98514	DLC1, MTSS1, ENAH, SHROOM3, PDGFA, BCAR1, CALR, RHOU, CTTNBP2, PRR5, BCL2, RAC1, PALM2, SH2B2, BCL6, CNN2, FMNL2, TNXB, TMSB10, MYH6, RACGAP1, PPP1R9B, CORO1A, EPB4.1L1, EPS8, LIMCH1, FLII, ANTXR1, WASL, DBN1, CDC42BPB	1.59059	1	0.270938	17.2829
GO:0051056~regulation of small GTPase mediated signal transduction	0.0107916	1.96691	ARFGAP2, FGD1, TBC1D8, PREX1, SIPA1, IQGAP3, RASGEF1B, ASAP2, RABGAP1L, AKAP13, CYTH3, ADAP1, GARNL3, SMAP1, GBF1, SOS1, RAPGEF6, GIT2, TBC1D5, BCL6, RAPGEF2, RAPGEF1, RASA4, IQSEC2, ARHGEF4, GIT1, ARHGEF9, VAV2, ECT2, TBC1D22B, FARP1, ARHGEF11, TBC1D25, NDEL1, PSD, RASGRF1, DGKZ, MTOR, ARAP1, KALRN	1.48527	1	0.278679	17.9565
GO:0032012~regulation of ARF protein signal transduction	0.0107977	1.96667	GIT1, ARFGAP2, SMAP1, PSD, GBF1, ASAP2, GIT2, CYTH3, ARAP1, ADAP1, IQSEC2	2.4507	1	0.276723	17.9657
GO:0048878~chemical homeostasis	0.010933	1.96126	SLC9A8, LDLR, CLSTN1, DMPK, LNPEP, ATP2B2, GRIN2B, APOE, SLC1A6, GRIN2D, CHRNA4, CHRNA7, OLIG2, CUTC, MT3, SGK1, EGR2, GRIN2A, CACNG2, CDK5, SSTR5, NPC1, NPC2, LYST, NAB1, RYR2, STC1, GPR12, MYO5A, CAV1, ADORA2A, PTH1R, TTC7, KCNA5, GCLM, FKBP1B, PEX5L, BCL2, SCARB1, SH2B2, POU3F1, WDTC1, SLC8A1, SCD2, HTT, CACNA1I, ACACA, ATP1A3, SOD1, RPS6, PARK7, KDR, SLC4A10, ATP2A2, AVPR1A, CACNA1G, EPOR, CA…	1.36848	1	0.277593	18.1701
GO:0050767~regulation of neurogenesis	0.0110638	1.95609	RTN4, NOG, SOX2, BEX1, CDH4, MEIS1, EPHB2, LINGO1, METRN, MAPT, BCL2, VWC2, MT3, KLK8, DLL1, ISL1, MIB1, NOTCH1, YWHAG, SERPINF1, SEMA4F, FOXG1, ID4, SEMA4D, SYNGAP1, CACNA1A	1.66755	1	0.278353	18.3674
GO:0032989~cellular component morphogenesis	0.0113491	1.94504	ENAH, NOG, PIP5K1C, TGFB2, ATP2B2, BOC, EGFR, EGR2, STXBP1, MYH6, ECT2, STK4, DNAIC2, CDK5, SLIT2, NUMBL, SLITRK2, NDEL1, SEMA4F, 6530402F18RIK, FOXG1, DST, CHL1, ABLIM1, SHROOM3, ADORA2A, CLU, EPHB3, CDH4, EPHB2, DMD, BCL2, RAC1, LMTK2, ETV1, NKX2-1, BCL6, B3GNT2, DCX, DCLK1, KLK8, RTN4R, RPGRIP1L, NR4A2, DPYSL5, NFASC, NTNG2, RPL24, SOD1, ISL1, NTN3, SEMA6A, NOTCH1, SEMA6C, SYNE2, DLX5, ANTXR1,…	1.37483	1	0.282363	18.7958
GO:0050801~ion homeostasis	0.011401	1.94306	SLC9A8, CLSTN1, DMPK, LNPEP, ATP2B2, GRIN2B, APOE, SLC1A6, GRIN2D, CHRNA4, CHRNA7, OLIG2, CUTC, MT3, SGK1, EGR2, GRIN2A, CACNG2, CDK5, NAB1, RYR2, STC1, GPR12, MYO5A, CAV1, ADORA2A, PTH1R, TTC7, KCNA5, GCLM, FKBP1B, PEX5L, BCL2, POU3F1, SLC8A1, SCD2, HTT, CACNA1I, ATP1A3, SOD1, PARK7, KDR, SLC4A10, ATP2A2, CACNA1G, AVPR1A, EPOR, CACNA1C, CACNA1A	1.41582	1	0.281414	18.8735
GO:0008380~RNA splicing	0.0116366	1.93417	SCAF1, RALY, NCBP1, NHP2L1, PPIL1, LSM7, WBP4, SF3B3, NONO, HNRNPM, SF3B1, TARDBP, DHX15, LSM5, U2AF1, LSM4, HNRNPC, SNRNP35, LSM2, SNRNP70, LUC7L3, NOVA1, SNRPA1, HNRNPA2B1, RNPS1, DDX5, EIF4A3, CELF4, SYF2, LSM11, SNRNP40, RBM38, HNRNPH1, SNRPE, TXNL4A, SNRPG	1.51631	1	0.28429	19.2255
GO:0016044~membrane organization	0.0118044	1.92796	CAV2, ABCA7, CAV1, SNAP91, LDLR, HIP1R, SYT7, MEGF10, AMPH, CTTN, AP1S2, BCL2, SNPH, RAC1, SCARB1, CHRNA7, AGRN, EHD1, COX16, DHCR24, HIP1, LRSAM1, NPLOC4, HTT, STXBP1, DENND1A, LMNA, SOD1, NPC1, LRP1, NDEL1, SYNE2, LRP10, FNBP1L, AP2A1, LRP11, SORT1, LRP8, VAMP2, STEAP2, LRP2, UNC13A, EPN1, SH3GL2, LRP5, VLDLR	1.43176	1	0.28572	19.4752
GO:0042592~homeostatic process	0.0124169	1.90599	SLC9A8, LDLR, CLSTN1, STAT5B, DNAJC10, PRDX2, ILDR2, DMPK, TGFB2, LNPEP, ATP2B2, GPX1, GRIN2B, APOE, GRIN2D, SLC1A6, CHRNA4, CHRNA7, OLIG2, CUTC, MT3, CLNS1A, SGK1, EGR2, AIFM1, GRIN2A, RB1, CACNG2, CDK5, DCLRE1C, SSTR5, NPC1, RPS19, NPC2, LYST, NAB1, SLC25A38, RYR2, STC1, GPR12, MYO5A, CAV1, GLRX5, ADORA2A, PTH1R, TTC7, NHLRC2, KCNA5, PEX5L, FKBP1B, GCLM, HSPA1L, COL9A1, DMD, BCL2, RAC1, NPM1, S…	1.27571	1	0.296086	20.3809
GO:0016071~mRNA metabolic process	0.0126813	1.89684	SCAF1, RALY, NCBP1, LSM7, WBP4, NONO, TARDBP, WIBG, GPX4, U2AF1, LSM5, LSM4, LSM2, LUC7L3, CSDC2, SNRPA1, HNRNPA2B1, EIF4A3, CELF4, CELF3, ERN1, SNRNP40, RBM38, CPSF3, SNRPE, SNRPG, NHP2L1, PPIL1, KIN, SF3B3, HNRNPM, ZFP36L2, SF3B1, MOV10, DHX15, HNRNPC, SNRNP70, SNRNP35, NOVA1, UPF1, ADARB1, ADARB2, CEBPG, RNPS1, DDX5, PAPOLA, SYF2, LSM11, HNRNPH1, TXNL4A	1.40166	1	0.299289	20.7689
GO:0034614~cellular response to reactive oxygen species	0.0141649	1.84879	GPX1, GPX4, GPX3, PRDX2, CAT, SOD1, MT3	3.29235	1	0.325854	22.9127
GO:0051347~positive regulation of transferase activity	0.0145539	1.83702	ADORA2A, CSPG4, ZEB2, PRDX2, KIT, MAP3K5, DGKG, NPM1, RAC1, PDGFC, AGK, MAPKBP1, MDFI, MAP2K1, PICK1, CENPE, SOD1, VAV2, CDK5, IRS1, GRM1, ERN1, DGKZ, LRP8, HTR2A, VLDLR	1.6305	1	0.330967	23.4656
GO:0014037~Schwann cell differentiation	0.0149347	1.8258	EGR2, NAB1, POU3F1, SOD1, CDK5	4.70336	1	0.335813	24.0034
GO:0007271~synaptic transmission, cholinergic	0.0149347	1.8258	CHRM3, ADORA2A, CHRNA4, CHRNA7, SLC5A7	4.70336	1	0.335813	24.0034
GO:0006333~chromatin assembly or disassembly	0.0156392	1.80578	HIST4H4, HIST1H4K, HIST1H2AG, H1FX, CBX1, TSPYL1, HIST2H2AB, HIST1H4A, H2AFZ, H2AFY, HIST3H2A, HIST3H2BA, CHD5, HIST1H4H, HIST2H3B, HIST1H1E, SHPRH, HIST1H1D, HIST1H1C, HIST1H2BF, HIST1H1B, HIST1H1A, CEBPG, HIST1H2AI, H3F3A, HIST1H3H	1.70874	1	0.346373	24.9887
GO:0051674~localization of cell	0.0158068	1.80116	NRP2, ZFAND5, FUT8, PLXNA2, ATP5B, BCAR1, CSPG4, ZEB2, KIT, PRKG1, PEX5L, TGFB2, CTTNBP2, GPX1, GAB2, CTGF, RAC1, NKX2-1, SCARB1, LHX6, CHRNA7, DCX, INPP5B, DCLK1, NR2F1, EGFR, RET, FLT1, MAP2K1, MDGA1, NR4A2, ATP1A3, ITGA4, VAV2, ISL1, CDK5, KDR, CORO1A, NDEL1, SYNE2, NAV1, LYST, CNTN2, CELF3, LRP8, CHL1, LRP5	1.40107	1	0.347144	25.2213
GO:0048870~cell motility	0.0158068	1.80116	NRP2, ZFAND5, FUT8, PLXNA2, ATP5B, BCAR1, CSPG4, ZEB2, KIT, PRKG1, PEX5L, TGFB2, CTTNBP2, GPX1, GAB2, CTGF, RAC1, NKX2-1, SCARB1, LHX6, CHRNA7, DCX, INPP5B, DCLK1, NR2F1, EGFR, RET, FLT1, MAP2K1, MDGA1, NR4A2, ATP1A3, ITGA4, VAV2, ISL1, CDK5, KDR, CORO1A, NDEL1, SYNE2, NAV1, LYST, CNTN2, CELF3, LRP8, CHL1, LRP5	1.40107	1	0.347144	25.2213
GO:0032870~cellular response to hormone stimulus	0.0159497	1.79725	SGK1, WDTC1, IRS2, BCAR1, STAT5B, SOCS7, IRS1, LATS2, PHIP, GSK3A, SH2B2, INSR, PIK3R1, PIK3R2	2.04353	1	0.347469	25.4191
GO:0019216~regulation of lipid metabolic process	0.0159497	1.79725	CAV1, WDTC1, STAT5B, PNPLA2, RB1, VAV2, SOD1, ABCG4, IRS1, PEX5L, INSIG2, APOE, RAC1, ACSL4	2.04353	1	0.347469	25.4191
GO:0042063~gliogenesis	0.016103	1.79309	SOX10, NOTCH1, METRN, EGR2, ADORA2A, DNER, NAB1, CSPG4, NKX2-1, OLIG2, POU3F1, SOD1, CDK5	2.11651	1	0.347971	25.6307
GO:0006865~amino acid transport	0.0171969	1.76455	SLC36A1, HTT, SLC38A7, SLC7A8, XK, SLC7A5, SLC6A7, SLC7A3, SLC7A2, SLC7A1, SLC1A6, SLC25A22, SLC6A6, CACNA1A, APBA1, SLC46A1	1.90784	1	0.364554	27.1246
GO:0022604~regulation of cell morphogenesis	0.0176324	1.75369	RTN4, FGD1, PALM, KLK8, SHROOM3, GNA12, GAS2, CDH4, RHOU, EPHB2, CDC42EP2, METRN, CORO1A, SEMA4F, MAPT, PALM2, CFDP1, SEMA4D, SYNGAP1, CACNA1A	1.74558	1	0.369623	27.7114
GO:0002209~behavioral defense response	0.0182468	1.73881	GRM2, GRIN2B, PENK, BCL2, GABRA5, NEUROD2	3.6283	1	0.377504	28.5316
GO:0031290~retinal ganglion cell axon guidance	0.0182468	1.73881	SEMA4F, RPL24, EPHB3, ISL1, SLIT2, EPHB2	3.6283	1	0.377504	28.5316
GO:0001662~behavioral fear response	0.0182468	1.73881	GRM2, GRIN2B, PENK, BCL2, GABRA5, NEUROD2	3.6283	1	0.377504	28.5316
GO:0045669~positive regulation of osteoblast differentiation	0.0182468	1.73881	WNT7B, DLX5, JUND, CD276, GNAS, SMAD1	3.6283	1	0.377504	28.5316
GO:0007243~protein kinase cascade	0.0184026	1.73512	CAV1, NRG3, STAT5B, GNA12, CSPG4, PRDX2, KIT, FGF12, LATS2, LINGO1, MAP3K5, PKD1, ADRA2B, SIK1, MAPKBP1, AGPAT1, MAP2K5, MDFI, CNKSR2, RET, PLEK, MAP2K1, MAP2K4, PICK1, MAPK11, SMAD1, SOD1, CDK5, IRS1, GRM1, RPS6KA5, RPS6KA6, MAST1, RPS6KA4, DOK4, MAPK8IP2, ROR2, MAPK9, MAPK8IP1, NRGN	1.43492	1	0.377792	28.7382
GO:0042596~fear response	0.0186788	1.72865	GRM2, GRIN2B, PENK, BCL2, GABRA5, NEUROD2, ADRA2A	3.11907	1	0.380009	29.1032
GO:0015807~L-amino acid transport	0.0186788	1.72865	SLC36A1, SLC7A2, HTT, SLC7A8, SLC7A5, APBA1, CACNA1A	3.11907	1	0.380009	29.1032
GO:0007049~cell cycle	0.019718	1.70514	GAS2L3, SEPT3, SPIN1, S100A6, CDC14A, PRC1, RHOU, LATS2, RSPH1, PSMC3IP, CABLES2, SIK1, MTUS1, STAG2, KIF11, ANP32B, RBL2, PAPD7, LIG3, NUSAP1, RB1, 1700017B05RIK, CDK4, DCTN3, CDK5, AHR, VASH1, TACC2, PPP1CA, CHMP1A, REC8, CCND2, ERN1, G0S2, RBM38, ARL8A, SIAH2, PDCD6IP, MAPK7, DST, BLCAP, ING4, CKS1B, HAUS1, CETN3, POLA1, NEDD9, ZFP318, SYCP1, PIN1, MLF1, SPC25, PRR5, GADD45GIP1, GP1BB, BCL2, C…	1.24704	1	0.394163	30.4603
GO:0043279~response to alkaloid	0.0200197	1.69854	GRM2, ADORA2A, BCL2, CHRNA5, ABAT, RYR2, CHRNA4, CHRNA7, CDK5	2.53981	1	0.396567	30.8496
GO:0006396~RNA processing	0.0208222	1.68147	SCAF1, RALY, NAF1, NCBP1, RBM3, LSM7, TRMT1, INTS3, WBP4, NONO, EBNA1BP2, INTS5, TARDBP, GPX4, U2AF1, LSM5, LSM4, LSM2, LUC7L3, CSDC2, SNRPA1, EXOSC7, HNRNPA2B1, RSL1D1, EIF4A3, LARP7, RPS14, CELF4, CELF3, ERN1, RBM38, SNRNP40, CPSF3, TRUB2, SNRPE, C1D, SNRPG, HSD17B10, NHP2L1, PPIL1, KIN, SF3B3, SF3B1, HNRNPM, MOV10, WDR55, DHX15, HNRNPC, SNRNP70, RPL10A, SNRNP35, NOVA1, NSA2, MOCS3, ADARB1, ADA…	1.298	1	0.4065	31.8752
GO:0010324~membrane invagination	0.0208224	1.68147	CAV2, ABCA7, CAV1, LDLR, HIP1R, MEGF10, AMPH, CTTN, AP1S2, RAC1, SCARB1, CHRNA7, EHD1, COX16, HIP1, LRSAM1, STXBP1, DENND1A, NPC1, LRP1, LRP10, AP2A1, FNBP1L, LRP11, SORT1, LRP8, STEAP2, LRP2, UNC13A, SH3GL2, EPN1, LRP5, VLDLR	1.48606	1	0.404239	31.8756
GO:0006897~endocytosis	0.0208224	1.68147	CAV2, ABCA7, CAV1, LDLR, HIP1R, MEGF10, AMPH, CTTN, AP1S2, RAC1, SCARB1, CHRNA7, EHD1, COX16, HIP1, LRSAM1, STXBP1, DENND1A, NPC1, LRP1, LRP10, AP2A1, FNBP1L, LRP11, SORT1, LRP8, STEAP2, LRP2, UNC13A, SH3GL2, EPN1, LRP5, VLDLR	1.48606	1	0.404239	31.8756
GO:0046578~regulation of Ras protein signal transduction	0.0209025	1.6798	ARFGAP2, FGD1, TBC1D8, PREX1, ASAP2, AKAP13, RABGAP1L, CYTH3, ADAP1, SMAP1, GBF1, SOS1, GIT2, TBC1D5, BCL6, IQSEC2, GIT1, ARHGEF4, ARHGEF9, VAV2, ECT2, TBC1D22B, FARP1, ARHGEF11, TBC1D25, NDEL1, PSD, RASGRF1, DGKZ, MTOR, ARAP1, KALRN	1.49676	1	0.403193	31.9771
GO:0006869~lipid transport	0.021338	1.67085	OSBPL5, ABCA7, OSBP2, LDLR, OSBPL6, OSBPL7, ATP11B, CFTR, ATP11C, SIGMAR1, ABCG4, NPC1, NPC2, LRP10, NOLC1, APOE, OSBPL1A, ATP8A2, OSBPL10, SCARB1, SCP2, SLC27A2, VLDLR	1.63629	1	0.407403	32.5269
GO:0010001~glial cell differentiation	0.0217935	1.66167	SOX10, METRN, NOTCH1, EGR2, ADORA2A, DNER, NAB1, NKX2-1, POU3F1, OLIG2, SOD1, CDK5	2.11651	1	0.411816	33.0974
GO:0006091~generation of precursor metabolites and energy	0.0225207	1.64742	LDHB, NDUFB5, NDUFB7, NDUFB8, ATP5B, HK2, HK1, ATP5G2, ATP5G1, NDUFS6, UQCR11, IDH3G, NDUFS4, IDH2, CAT, DHTKD1, ATP5H, ATP5K, ATP5J, NDUFA5, NDUFB10, NDUFA8, MSH2, SUCLG2, FADS1, NDUFA7, FADS3, IDH3B, NDUFA13, NDUFC1, NDUFA1, NDUFA12, ATP6V1F, SDHA, CYBA, SDHB, PPP1CA, GBE1, PKLR, ATP5C1, ATP6V0A1, GNAS, STEAP2	1.39479	1	0.420005	33.9989
GO:0006942~regulation of striated muscle contraction	0.0225981	1.64593	HDAC4, CACNA1G, RYR2, FKBP1B, DMPK	4.23302	1	0.418871	34.0942
GO:0030902~hindbrain development	0.0228825	1.6405	DLC1, SMAD9, EGR2, MAFB, PLXNA2, RPGRIP1L, SMAD1, RORA, CDK5, FOXP2, ATP2B2, BCL2, MYO16, CACNA1A, NFIB	1.89538	1	0.42065	34.4431
GO:0042743~hydrogen peroxide metabolic process	0.0240833	1.61828	GPX1, GPX4, GPX3, PRDX2, CAT, SOD1, PARK7	2.96312	1	0.434957	35.8972
GO:0007517~muscle organ development	0.0241896	1.61637	ZFAND5, CAV2, MTSS1, CAV1, FOXK1, TNC, UTRN, FHL2, TAGLN2, DTNBP1, TGFB2, GPX1, DMD, DNER, ETV1, AGRN, RARB, COL11A1, JPH1, ACADM, HIST1H1B, CRYAB, CBY1, CACNG2, MYH6, CDK5, FOXP2, EP300, COL19A1, P2RX2, SCN8A	1.49118	1	0.434163	36.0245
GO:0051960~regulation of nervous system development	0.0242551	1.6152	RTN4, NOG, SOX2, BEX1, CDH4, MEIS1, EPHB2, LINGO1, METRN, MAPT, BCL2, VWC2, AGRN, MT3, KLK8, DLL1, ISL1, MIB1, NOTCH1, YWHAG, SERPINF1, SEMA4F, FOXG1, ID4, SEMA4D, SYNGAP1, CACNA1A	1.54448	1	0.432831	36.1027
GO:0006366~transcription from RNA polymerase II promoter	0.0245329	1.61025	SCAF1, POLR2H, POLR2G, POLR2F, POLR2E, KLF13, LMO4, GTF2H4, MED13L, AHR, ELL2, MNAT1, GTF2F1, HIF3A, ATP6V0A1, ERCC3	1.8305	1	0.434346	36.4338
GO:0021955~central nervous system neuron axonogenesis	0.0247654	1.60615	NDEL1, NR4A2, EPHB3, DCX, DCLK1, EPHB2	3.38642	1	0.43524	36.7096
GO:0055117~regulation of cardiac muscle contraction	0.024929	1.6033	HDAC4, CACNA1G, RYR2, FKBP1B	5.64403	1	0.435218	36.903
GO:0008361~regulation of cell size	0.0268098	1.57171	RTN4, WDTC1, FOXK1, NDUFA13, CDK4, CDH4, TGFB2, ATP2B2, SEMA4F, BBC3, TRO, BCL2, MAPT, NPM1, LEFTY2, MTOR, DCX, EMP1, DCLK1, CACNA1A, SERTAD2	1.64618	1	0.457144	39.0865
GO:0043269~regulation of ion transport	0.0269886	1.56882	CACNA2D1, CAV1, SLC8A1, SGK1, NOS1, ADORA2A, KCNA5, FKBP1B, DMPK, ATP2B2, NEDD4, BCL2, RYR2, HTR2A	1.91169	1	0.457175	39.2903
GO:0043549~regulation of kinase activity	0.0273439	1.56314	CAV1, ADORA2A, CSPG4, ZEB2, PRDX2, KIT, PDCD4, SPRY4, LATS2, MAP3K5, DGKG, NPM1, RAC1, PDGFC, MAPKBP1, AGK, MDFI, TNXB, MAP2K1, PICK1, CENPE, RB1, VAV2, SOD1, CDK5, IRS1, GRM1, ERN1, DGKZ, LRP8, MTOR, HTR2A, VLDLR	1.4551	1	0.459386	39.6934
GO:0045667~regulation of osteoblast differentiation	0.0274322	1.56174	HDAC4, WNT7B, DLX5, JUND, SOX2, CD276, GNAS, SMAD1	2.60494	1	0.458294	39.7932
GO:0051495~positive regulation of cytoskeleton organization	0.0274322	1.56174	CTTNBP2, CAV1, PLEK, MAPT, RAC1, CENPE, MTOR, SYNPO	2.60494	1	0.458294	39.7932
GO:0006119~oxidative phosphorylation	0.0280769	1.55165	NDUFB8, MSH2, ATP5B, NDUFA7, ATP5G2, ATP5G1, ATP6V1F, UQCR11, ATP5C1, ATP6V0A1, ATP5H, ATP5K, ATP5J	1.96533	1	0.463973	40.5171
GO:0017157~regulation of exocytosis	0.0291153	1.53588	STX1A, DOC2A, RAB3D, CADPS2, GP1BB, VAMP2, CDK5, PCLO, CACNA1A	2.38107	1	0.474183	41.6657
GO:0051172~negative regulation of nitrogen compound metabolic process	0.030935	1.50955	BMI1, JDP2, THRA, FOXK1, HR, ZEB2, CBX1, ZEB1, MAF1, MXI1, PDCD4, OLIG2, RARB, NFX1, NR2F1, CTBP2, RARG, RCOR2, NDUFA13, RB1, MBD3, SPEN, RBBP7, MXD3, NRIP1, CTNNBIP1, CHMP1A, NCOA2, HIPK2, NAB1, MAP3K10, ATPIF1, CUX2, ZFPM1, C1D, PALM, CAV1, BCLAF1, GLIS2, SOX2, HAT1, NPAS1, ZKSCAN17, NPM1, PER2, NKX2-1, BCL6, MDFI, WDTC1, IKZF1, KLF12, MSH2, SAMD11, SKI, MYPOP, FOXP2, HDAC4, JAZF1, HIVEP1, HDAC…	1.28785	1	0.492994	43.6282
GO:0006357~regulation of transcription from RNA polymerase II promoter	0.0314752	1.50203	BMI1, CHURC1, JDP2, THRA, FOXK1, STAT5B, ZEB1, RORA, CNOT7, MXI1, TRAK1, RARB, OLIG2, TOP2A, NR2F1, NFX1, SOX10, EGR2, RARG, OTX1, MED11, ARNTL, RB1, MBD3, SPEN, RBBP7, AHR, MED10, NRIP1, CTNNBIP1, NCOA2, EP300, MED15, MTF1, ZMIZ1, HIPK2, MED9, ZFPM1, FUS, ABLIM1, HMGB2, CNBP, CAMTA2, GLIS2, SOX2, FHL2, NFYA, MEIS1, SOX8, NPAS1, NPAS2, ZKSCAN17, PER2, NKX2-1, BCL6, AGRN, TCEA2, POU3F1, NFATC2, MD…	1.22318	1	0.496857	44.1986
GO:0060627~regulation of vesicle-mediated transport	0.0318977	1.49624	STX1A, LRSAM1, RAB3D, RAB4A, CALR, PCLO, CDK5, MIB1, DOC2A, CADPS2, GP1BB, SNPH, SCARB1, VAMP2, CACNA1A, COX16, HIP1	1.73401	1	0.49935	44.641
GO:0021952~central nervous system projection neuron axonogenesis	0.0322558	1.49139	NR4A2, EPHB3, DCX, DCLK1, EPHB2	3.8482	1	0.501096	45.0134
GO:0021795~cerebral cortex cell migration	0.0326073	1.48669	EGFR, RAC1, NKX2-1, LRP8, LHX6, CDK5	3.17477	1	0.502744	45.3765
GO:0001502~cartilage condensation	0.0326073	1.48669	THRA, CTGF, ROR2, PKD1, COL11A1, TGFB2	3.17477	1	0.502744	45.3765
GO:0048742~regulation of skeletal muscle fiber development	0.0326073	1.48669	HDAC4, BTG1, BCL2, AGRN, HDAC9, BOC	3.17477	1	0.502744	45.3765
GO:0045860~positive regulation of protein kinase activity	0.0326483	1.48614	MDFI, MAP2K1, ADORA2A, PICK1, CSPG4, PRDX2, ZEB2, CENPE, KIT, SOD1, GRM1, CDK5, MAP3K5, DGKG, NPM1, ERN1, DGKZ, LRP8, PDGFC, MAPKBP1, AGK, VLDLR, HTR2A	1.57031	1	0.501026	45.4188
GO:0010629~negative regulation of gene expression	0.0329417	1.48225	BMI1, NCBP1, JDP2, THRA, FOXK1, RBM3, HR, ZEB2, CBX1, ZEB1, MAF1, MXI1, PDCD4, RARB, OLIG2, NFX1, NR2F1, CTBP2, RARG, RCOR2, NDUFA13, RB1, MBD3, SPEN, RBBP7, KCNQ1OT1, MXD3, NRIP1, CTNNBIP1, CHMP1A, NCOA2, HIPK2, NAB1, MAP3K10, CUX2, ZFPM1, C1D, BCLAF1, GLIS2, SOX2, HAT1, NPAS1, MOV10, TNRC6C, ZKSCAN17, PER2, NKX2-1, BCL6, TNRC6B, MDFI, WDTC1, IKZF1, KLF12, SAMD11, SKI, MYPOP, FOXP2, HDAC4, JAZF1…	1.28023	1	0.502034	45.7199
GO:0051147~regulation of muscle cell differentiation	0.0333761	1.47656	HDAC4, BTG1, BCL2, EZH2, AGRN, ZEB1, HDAC9, BOC	2.50846	1	0.504526	46.163
GO:0045935~positive regulation of nucleobase, nucleoside, nucleotide and nucleic acid metabolic process	0.0341689	1.46637	NCBP1, CHURC1, THRA, FOXK1, STAT5B, RORB, RORA, ZEB1, CNOT7, GPX4, GUCY1A2, GUCY1A3, RARB, TOP2A, SERTAD2, SOX10, EGR2, RARG, RELA, ARNTL, RB1, AHR, NCOA2, EP300, MTF1, ZMIZ1, HIPK2, FUS, ABLIM1, HMGB2, CNBP, CAMTA2, ADORA2A, GLIS2, SOX2, NFYB, NFYA, SOX8, RGMB, NPAS2, NKX2-1, ETV1, AGRN, POU3F1, NFATC2, BCKDHA, KLF6, IKZF2, IKZF1, KLF12, MAFB, KLF13, CEBPG, CREBBP, ESRRG, NR4A2, AFF1, SMAD1, ISL…	1.24501	1	0.510724	46.9627
GO:0019233~sensory perception of pain	0.0345862	1.4611	GRIN2B, PENK, GRIN2D, GRIN2A, CHRNA4, NPY1R, CDK5, GRM1, HTR2A	2.30892	1	0.51292	47.3792
GO:0030900~forebrain development	0.0346792	1.45993	DLC1, NOG, SOX2, ZEB2, PRKG1, RAC1, NKX2-1, LHX6, RARB, LHX8, DCLK1, NR2F1, EGFR, IKZF1, HTT, OTX1, RPGRIP1L, ISL1, CDK5, TACC2, FOXP2, NUMBL, SALL3, NOTCH1, FOXG1, LRP8, ID4, LRP2, NFIB	1.47015	1	0.511762	47.4716
GO:0050770~regulation of axonogenesis	0.0347079	1.45957	RTN4, KLK8, METRN, SEMA4F, MAPT, SEMA4D, SYNGAP1, CDH4, CACNA1A, EPHB2	2.17078	1	0.509955	47.5001
GO:0045934~negative regulation of nucleobase, nucleoside, nucleotide and nucleic acid metabolic process	0.0361097	1.44238	BMI1, JDP2, THRA, FOXK1, HR, ZEB2, CBX1, ZEB1, MAF1, MXI1, PDCD4, OLIG2, RARB, NFX1, NR2F1, CTBP2, RARG, RCOR2, NDUFA13, RB1, MBD3, SPEN, RBBP7, MXD3, NRIP1, CTNNBIP1, CHMP1A, NCOA2, HIPK2, NAB1, MAP3K10, ATPIF1, CUX2, ZFPM1, C1D, PALM, BCLAF1, GLIS2, SOX2, HAT1, NPAS1, ZKSCAN17, NPM1, PER2, NKX2-1, BCL6, MDFI, WDTC1, IKZF1, KLF12, MSH2, SAMD11, SKI, MYPOP, FOXP2, HDAC4, JAZF1, HIVEP1, HDAC9, NFIC	1.2795	1	0.522018	48.8735
GO:0034599~cellular response to oxidative stress	0.0378018	1.42249	GPX1, GPX4, GPX3, PRDX2, CAT, SOD1, MT3	2.69374	1	0.536464	50.4861
GO:0051153~regulation of striated muscle cell differentiation	0.0378018	1.42249	HDAC4, BTG1, BCL2, EZH2, AGRN, HDAC9, BOC	2.69374	1	0.536464	50.4861
GO:0010882~regulation of cardiac muscle contraction by calcium ion signaling	0.0384967	1.41458	HDAC4, RYR2, FKBP1B	8.46604	1	0.540988	51.1344
GO:0016584~nucleosome positioning	0.0384967	1.41458	HIST1H1E, HIST1H1D, HIST1H1C	8.46604	1	0.540988	51.1344
GO:0006177~GMP biosynthetic process	0.0384967	1.41458	IMPDH1, GMPS, IMPDH2	8.46604	1	0.540988	51.1344
GO:0018198~peptidyl-cysteine modification	0.0398454	1.39962	MOCS3, NOS1, RAB3D, MAP6D1	4.83774	1	0.551481	52.3697
GO:0000082~G1/S transition of mitotic cell cycle	0.0401183	1.39666	CCND2, BCL2, CAMK2B, ID4, RB1, RPS6, RHOU, LATS2	2.41887	1	0.55189	52.616
GO:0021537~telencephalon development	0.0401802	1.39599	EGFR, HTT, SOX2, RPGRIP1L, ZEB2, CDK5, TACC2, FOXP2, SALL3, RAC1, NKX2-1, LRP8, ID4, LHX6, RARB	1.76376	1	0.550371	52.6717
GO:0051924~regulation of calcium ion transport	0.0407124	1.39027	ATP2B2, CACNA2D1, SLC8A1, CAV1, NOS1, ADORA2A, BCL2, RYR2, FKBP1B	2.24101	1	0.553131	53.1482
GO:0055088~lipid homeostasis	0.0407124	1.39027	NPC1, CAV1, NPC2, LDLR, APOE, LYST, ACACA, SCARB1, PEX5L	2.24101	1	0.553131	53.1482
GO:0045665~negative regulation of neuron differentiation	0.0407124	1.39027	MIB1, NOTCH1, SOX2, FOXG1, BEX1, ID4, DLL1, ISL1, MEIS1	2.24101	1	0.553131	53.1482
GO:0016079~synaptic vesicle exocytosis	0.0418312	1.3785	STX1A, TRIM9, SV2B, VAMP2, UNC13B, PCLO	2.98802	1	0.561051	54.1349
GO:0051338~regulation of transferase activity	0.0424345	1.37228	CAV1, ADORA2A, CSPG4, ZEB2, PRDX2, KIT, PDCD4, SPRY4, LATS2, MAP3K5, DGKG, NPM1, RAC1, PDGFC, MAPKBP1, AGK, MDFI, TNXB, MAP2K1, PICK1, CENPE, RB1, VAV2, SOD1, CDK5, IRS1, GRM1, ERN1, DGKZ, LRP8, MTOR, HTR2A, VLDLR	1.40392	1	0.564282	54.6589
GO:0030278~regulation of ossification	0.0427069	1.3695	HDAC4, ANK, WNT7B, EGR2, BCL2, DLX5, JUND, SOX2, CD276, GNAS, SMAD1, TOB2	1.91684	1	0.564599	54.8936
GO:0001937~negative regulation of endothelial cell proliferation	0.0439702	1.35684	CTTNBP2, CAV2, CAV1, ATPIF1, VASH1	3.52752	1	0.573367	55.9671
GO:0070301~cellular response to hydrogen peroxide	0.0439702	1.35684	GPX1, GPX4, GPX3, PRDX2, CAT	3.52752	1	0.573367	55.9671
GO:0033059~cellular pigmentation	0.0439702	1.35684	MYO5A, SHROOM3, BLOC1S3, BCL2, LYST	3.52752	1	0.573367	55.9671
GO:0042744~hydrogen peroxide catabolic process	0.0439702	1.35684	GPX1, GPX4, GPX3, PRDX2, CAT	3.52752	1	0.573367	55.9671
GO:0051301~cell division	0.0443154	1.35345	BMI1, CKS1B, SEPT3, CDC14A, PRC1, HAUS1, CETN3, NEDD9, SYCP1, LATS2, TGFB2, SPC25, CDCA7, CDC123, CABLES2, CLASP1, TOP2A, STAG2, KIF11, LIG3, PAPD7, NUSAP1, CDC20, CENPE, RB1, 1700017B05RIK, RACGAP1, CEP63, CDC26, DCTN3, CDK4, CDK5, MCM5, CENPH, SMC4, FSD1, PPP1CA, CHMP1A, NOTCH1, CCND2, CKS2, ARL8A, PDCD6IP, TXNL4A	1.32564	1	0.574238	56.2562
GO:0032318~regulation of Ras GTPase activity	0.0458408	1.33875	GIT1, ARFGAP2, TBC1D8, ASAP2, RABGAP1L, TBC1D22B, ADAP1, TBC1D25, SMAP1, NDEL1, RASGRF1, TBC1D5, GIT2, BCL6, MTOR, ARAP1	1.69321	1	0.584826	57.5125
GO:0016481~negative regulation of transcription	0.0461345	1.33597	BMI1, JDP2, THRA, FOXK1, HR, ZEB2, CBX1, ZEB1, MAF1, MXI1, PDCD4, OLIG2, RARB, NFX1, NR2F1, CTBP2, RARG, RCOR2, NDUFA13, RB1, MBD3, SPEN, RBBP7, MXD3, NRIP1, CTNNBIP1, CHMP1A, NCOA2, HIPK2, NAB1, MAP3K10, CUX2, ZFPM1, C1D, BCLAF1, GLIS2, SOX2, HAT1, NPAS1, ZKSCAN17, PER2, NKX2-1, BCL6, MDFI, WDTC1, KLF12, IKZF1, SAMD11, SKI, MYPOP, FOXP2, HDAC4, JAZF1, HIVEP1, NFIC, HDAC9	1.27446	1	0.58519	57.7504
GO:0015918~sterol transport	0.0462059	1.3353	NPC1, NPC2, LDLR, APOE, SCARB1, CFTR, ABCG4	2.57662	1	0.583757	57.808
GO:0032312~regulation of ARF GTPase activity	0.0462059	1.3353	GIT1, ARFGAP2, SMAP1, ASAP2, GIT2, ARAP1, ADAP1	2.57662	1	0.583757	57.808
GO:0030301~cholesterol transport	0.0462059	1.3353	NPC1, NPC2, LDLR, APOE, SCARB1, CFTR, ABCG4	2.57662	1	0.583757	57.808
GO:0051173~positive regulation of nitrogen compound metabolic process	0.0464068	1.33342	NCBP1, CHURC1, THRA, FOXK1, STAT5B, RORB, RORA, ZEB1, CNOT7, GPX4, GUCY1A2, GUCY1A3, RARB, TOP2A, SERTAD2, SOX10, EGR2, RARG, RELA, ARNTL, RB1, AHR, NCOA2, EP300, MTF1, ZMIZ1, HIPK2, FUS, ABLIM1, HMGB2, CNBP, CAMTA2, ADORA2A, GLIS2, SOX2, NFYB, NFYA, SOX8, HRH1, RGMB, NPAS2, NKX2-1, ETV1, AGRN, POU3F1, NFATC2, BCKDHA, KLF6, IKZF2, IKZF1, KLF12, MAFB, KLF13, CEBPG, CREBBP, ESRRG, NR4A2, AFF1, SMAD…	1.22323	1	0.58338	57.9699
GO:0009890~negative regulation of biosynthetic process	0.047088	1.32709	BMI1, JDP2, THRA, FOXK1, HR, ZEB2, CBX1, ZEB1, MAF1, MXI1, PDCD4, INSIG2, RARB, OLIG2, NR2F1, NFX1, CTBP2, RARG, RCOR2, NDUFA13, RB1, MBD3, SPEN, RBBP7, MXD3, NRIP1, INHBB, CTNNBIP1, CHMP1A, NCOA2, HIPK2, NAB1, MAP3K10, CUX2, ZFPM1, C1D, PALM, CAV1, BCLAF1, GLIS2, SOX2, HAT1, NPAS1, ZKSCAN17, PER2, NKX2-1, BCL6, MDFI, WDTC1, IKZF1, KLF12, PAIP2, SAMD11, CD276, SKI, MYPOP, SOD1, FOXP2, HDAC4, JAZF…	1.24845	1	0.586838	58.5142
GO:0016573~histone acetylation	0.0475186	1.32314	BMI1, YEATS4, ING4, EP300, CREBBP, HAT1, RUVBL2, TRRAP, MBD3	2.17698	1	0.588266	58.8548
GO:0044093~positive regulation of molecular function	0.0498962	1.30193	HMGB2, CAV1, ADCY2, ADORA2A, ADCY6, PTH1R, CSPG4, ZEB2, PRDX2, KIT, GCLM, MAP3K5, DGKG, BCL2, RAC1, NPM1, PDGFC, CAT, MAPKBP1, AGK, HIP1, MDFI, MAP2K1, RELA, CREBBP, PICK1, NR4A2, CENPE, NFAM1, VAV2, SOD1, CDK5, IRS1, GRM1, RNF7, NDEL1, CHRM3, BTG1, BBC3, RASGRF1, HIPK2, ERN1, DGKZ, GNAS, LRP8, VLDLR, HTR2A	1.30034	1	0.604623	60.6885
GO:0043085~positive regulation of catalytic activity	0.0499035	1.30187	CAV1, ADCY2, ADORA2A, ADCY6, PTH1R, CSPG4, ZEB2, PRDX2, KIT, GCLM, MAP3K5, BCL2, DGKG, NPM1, RAC1, PDGFC, MAPKBP1, AGK, HIP1, MDFI, MAP2K1, PICK1, NR4A2, CENPE, VAV2, SOD1, CDK5, IRS1, GRM1, RNF7, NDEL1, CHRM3, BTG1, BBC3, RASGRF1, ERN1, DGKZ, GNAS, LRP8, VLDLR, HTR2A	1.32991	1	0.602712	60.6941
GO:0043543~protein amino acid acylation	0.0507306	1.29473	BMI1, YEATS4, ING4, EP300, ZDHHC3, CREBBP, HAT1, RUVBL2, TRRAP, MBD3, MAP6D1	1.94013	1	0.606944	61.3135
GO:0007626~locomotory behavior	0.050756	1.29451	MYO5A, NRP2, ADORA2A, SOBP, KIT, CALB1, TGFB2, ATP2B2, NPAS2, NPAS3, PDE1B, GRIN2D, RAC1, CHRNA4, NKX2-1, APBA2, APBA1, GNAO1, HTT, NR4A2, GRIN2A, ATP1A3, NPY1R, CELSR1, SOD1, GRM1, PARK7, SLIT2, CORO1A, GRM2, EPS8, LYST, HIPK2, SCN8A, CACNA1C, CACNA1A, CHL1, CACNA1B	1.34607	1	0.605186	61.3324
GO:0045941~positive regulation of transcription	0.05176	1.28601	CHURC1, THRA, FOXK1, STAT5B, RORB, RORA, ZEB1, CNOT7, RARB, TOP2A, SERTAD2, SOX10, RARG, EGR2, RELA, ARNTL, RB1, AHR, NCOA2, EP300, MTF1, ZMIZ1, HIPK2, FUS, ABLIM1, HMGB2, CNBP, CAMTA2, GLIS2, SOX2, NFYB, NFYA, SOX8, RGMB, NPAS2, ETV1, NKX2-1, AGRN, POU3F1, NFATC2, BCKDHA, KLF6, IKZF2, IKZF1, KLF12, MAFB, KLF13, CREBBP, ESRRG, NR4A2, AFF1, SMAD1, DDX5, ISL1, HDAC4, NOTCH1, DLX6OS1, PKNOX1, IRF6, …	1.2298	1	0.610632	62.0717
GO:0022029~telencephalon cell migration	0.0524721	1.28007	EGFR, RAC1, NKX2-1, LRP8, LHX6, CDK5	2.82201	1	0.61386	62.5879
GO:0007214~gamma-aminobutyric acid signaling pathway	0.0524721	1.28007	GABRG1, GABRA1, GABRA3, GABRA5, GABBR2, CACNA1A	2.82201	1	0.61386	62.5879
GO:0014070~response to organic cyclic substance	0.0531025	1.27488	GRM2, ADORA2A, BCL2, SLC22A8, CHRNA5, ABAT, RYR2, CHRNA4, CHRNA7, CDK5	2.01572	1	0.616451	63.0394
GO:0031327~negative regulation of cellular biosynthetic process	0.0543466	1.26483	BMI1, JDP2, THRA, FOXK1, HR, ZEB2, CBX1, ZEB1, MAF1, MXI1, PDCD4, INSIG2, RARB, OLIG2, NR2F1, NFX1, CTBP2, RARG, RCOR2, NDUFA13, RB1, MBD3, SPEN, RBBP7, MXD3, NRIP1, INHBB, CTNNBIP1, CHMP1A, NCOA2, HIPK2, NAB1, MAP3K10, CUX2, ZFPM1, C1D, PALM, CAV1, BCLAF1, GLIS2, SOX2, HAT1, NPAS1, ZKSCAN17, PER2, NKX2-1, BCL6, MDFI, WDTC1, IKZF1, KLF12, PAIP2, SAMD11, CD276, SKI, MYPOP, FOXP2, HDAC4, JAZF1, HIV…	1.24037	1	0.623295	63.9152
GO:0070507~regulation of microtubule cytoskeleton organization	0.0550244	1.25944	XPO1, CTTNBP2, CAV1, MAPT, NPM1, CENPE, CLASP1, DST, MAP6D1	2.11651	1	0.626084	64.3841
GO:0006473~protein amino acid acetylation	0.0550244	1.25944	BMI1, YEATS4, ING4, EP300, CREBBP, HAT1, RUVBL2, TRRAP, MBD3	2.11651	1	0.626084	64.3841
GO:0051146~striated muscle cell differentiation	0.0558679	1.25284	CAV2, ACADM, TNC, UTRN, FHL2, CBY1, RB1, CACNG2, MYH6, NEO1, NTN3, GPX1, DNER, P2RX2, SORT1, AGRN, RARB	1.61711	1	0.629951	64.9595
GO:0007422~peripheral nervous system development	0.0561097	1.25096	SOX10, EGR2, NAB1, BAI2, POU3F1, SOD1, CDK5, SOX8	2.25761	1	0.629705	65.1228
GO:0045596~negative regulation of cell differentiation	0.056679	1.24658	RTN4, NOG, CAV1, EZH2, STAT5B, SOX2, BEX1, PRDX2, ZEB1, MEIS1, EPHB2, TGFB2, NPHP3, LINGO1, BCL6, PIK3R1, MT3, KLK8, CREBBP, DLL1, ISL1, HDAC4, MIB1, NOTCH1, SEMA4F, FOXG1, ID4, TGFB1I1, SYNGAP1, TOB2	1.3955	1	0.631656	65.5046
GO:0051329~interphase of mitotic cell cycle	0.0572768	1.24202	ANP32B, CCND2, BCL2, CDC123, POLA1, CAMK2B, ID4, RB1, RPS6, RHOU, LATS2	1.90054	1	0.633769	65.9012
GO:0045597~positive regulation of cell differentiation	0.0577348	1.23856	CLU, SOX2, STAT5B, BEX1, CDH4, EPHB2, TGFB2, METRN, SMAP1, MAPT, BCL2, JUND, VWC2, BOC, LPL, MAP2K1, IKZF1, ADAMTS20, CD276, SMAD1, RB1, WNT7B, NOTCH1, SERPINF1, BTG1, DLX5, FOXG1, GNAS, SEMA4D	1.40294	1	0.634934	66.2021
GO:0043113~receptor clustering	0.0577485	1.23846	PICK1, AGRN, SYNGAP1, CDK5, CACNA1A	3.25617	1	0.63318	66.2111
GO:0021799~cerebral cortex radially oriented cell migration	0.0582665	1.23458	RAC1, LRP8, LHX6, CDK5	4.23302	1	0.634731	66.5483
GO:0051881~regulation of mitochondrial membrane potential	0.0582665	1.23458	ADORA2A, HTT, BCL2, SOD1	4.23302	1	0.634731	66.5483
GO:0010522~regulation of calcium ion transport into cytosol	0.0582665	1.23458	CAV1, BCL2, RYR2, FKBP1B	4.23302	1	0.634731	66.5483
GO:0043550~regulation of lipid kinase activity	0.0582665	1.23458	RAC1, RB1, VAV2, IRS1	4.23302	1	0.634731	66.5483
GO:0021988~olfactory lobe development	0.0582665	1.23458	SALL3, HTT, RAC1, RPGRIP1L	4.23302	1	0.634731	66.5483
GO:0009891~positive regulation of biosynthetic process	0.0583511	1.23395	CHURC1, THRA, FOXK1, STAT5B, RORB, RORA, ZEB1, CNOT7, WIBG, GUCY1A2, GUCY1A3, RARB, TOP2A, SERTAD2, SOX10, EGR2, RARG, RELA, ARNTL, RB1, CDK4, AHR, NCOA2, EP300, MTF1, ZMIZ1, HIPK2, FUS, ABLIM1, HMGB2, CNBP, CAMTA2, ADORA2A, GLIS2, SOX2, NFYB, NFYA, SOX8, HRH1, RGMB, NPAS2, NPM1, NKX2-1, ETV1, AGRN, DYRK2, POU3F1, NFATC2, BCKDHA, KLF6, IKZF2, IKZF1, KLF12, MAFB, KLF13, CEBPG, CREBBP, ESRRG, NR4A2…	1.20075	1	0.633455	66.6031
GO:0010628~positive regulation of gene expression	0.0624377	1.20455	CHURC1, THRA, FOXK1, STAT5B, RORB, RORA, ZEB1, CNOT7, RARB, TOP2A, SERTAD2, SOX10, RARG, EGR2, RELA, ARNTL, RB1, AHR, NCOA2, EP300, MTF1, ZMIZ1, HIPK2, FUS, ABLIM1, HMGB2, CNBP, CAMTA2, GLIS2, SOX2, NFYB, KIT, NFYA, SOX8, RGMB, NPAS2, ETV1, NKX2-1, AGRN, POU3F1, NFATC2, BCKDHA, KLF6, IKZF2, IKZF1, KLF12, MAFB, KLF13, CREBBP, ESRRG, NR4A2, AFF1, SMAD1, DDX5, ISL1, HDAC4, NOTCH1, DLX6OS1, PKNOX1, I…	1.21439	1	0.657312	69.1503
GO:0015986~ATP synthesis coupled proton transport	0.0632447	1.19898	ATP5B, ATP5C1, ATP6V0A1, ATP5G2, ATP5G1, ATP5H, ATP5K, ATP6V1F, ATP5J	2.05931	1	0.660377	69.631
GO:0015985~energy coupled proton transport, down electrochemical gradient	0.0632447	1.19898	ATP5B, ATP5C1, ATP6V0A1, ATP5G2, ATP5G1, ATP5H, ATP5K, ATP6V1F, ATP5J	2.05931	1	0.660377	69.631
GO:0051254~positive regulation of RNA metabolic process	0.0638194	1.19505	NCBP1, CHURC1, THRA, FOXK1, STAT5B, RORB, RORA, ZEB1, CNOT7, GPX4, RARB, TOP2A, SERTAD2, SOX10, RARG, EGR2, RELA, ARNTL, RB1, AHR, EP300, NCOA2, MTF1, ZMIZ1, HIPK2, ABLIM1, FUS, HMGB2, CAMTA2, CNBP, SOX2, NFYB, NFYA, SOX8, NPAS2, NKX2-1, AGRN, POU3F1, NFATC2, BCKDHA, KLF6, IKZF2, IKZF1, KLF12, MAFB, KLF13, CREBBP, ESRRG, NR4A2, AFF1, SMAD1, ISL1, HDAC4, DLX6OS1, NOTCH1, PKNOX1, CSRNP1, NFIC, PBX2…	1.23253	1	0.662012	69.9691
GO:0001764~neuron migration	0.0641529	1.19278	MDGA1, NR4A2, PRKG1, CDK5, PEX5L, CTTNBP2, NDEL1, NAV1, CNTN2, NKX2-1, DCX, DCLK1, CHL1, NR2F1	1.69321	1	0.662204	70.1637
GO:0009894~regulation of catabolic process	0.0643519	1.19144	RNF180, HDAC4, XPO1, NPC1, CBLB, NEDD4, RELA, GRIN2A, PNPLA2, MTOR, ARNTL	1.86253	1	0.661602	70.2792
GO:0021885~forebrain cell migration	0.0645411	1.19016	EGFR, RAC1, NKX2-1, LRP8, LHX6, CDK5	2.67349	1	0.660948	70.3886
GO:0022900~electron transport chain	0.065445	1.18412	NDUFA5, NDUFB5, NDUFB10, NDUFA8, NDUFB7, NDUFB8, FADS1, NDUFA7, FADS3, NDUFA13, NDUFC1, NDUFA1, NDUFA12, SDHA, NDUFS6, SDHB, CYBA, NDUFS4, UQCR11, STEAP2	1.51179	1	0.664464	70.9062
GO:0031328~positive regulation of cellular biosynthetic process	0.0656715	1.18262	CHURC1, THRA, FOXK1, STAT5B, RORB, RORA, ZEB1, CNOT7, WIBG, GUCY1A2, GUCY1A3, RARB, TOP2A, SERTAD2, SOX10, EGR2, RARG, RELA, ARNTL, RB1, CDK4, AHR, NCOA2, EP300, MTF1, ZMIZ1, HIPK2, FUS, ABLIM1, HMGB2, CNBP, CAMTA2, ADORA2A, GLIS2, SOX2, NFYB, NFYA, SOX8, HRH1, RGMB, NPAS2, NPM1, NKX2-1, ETV1, AGRN, DYRK2, POU3F1, NFATC2, BCKDHA, KLF6, IKZF2, IKZF1, KLF12, MAFB, KLF13, CEBPG, CREBBP, ESRRG, NR4A2…	1.19629	1	0.664025	71.0346
GO:0048511~rhythmic process	0.0660687	1.18	CCRN4L, EGR2, STAT5B, PROKR2, ARNTL, CDK4, SOD1, NRIP1, KDR, PGR, HRH1, NPAS2, NR1D1, BCL2, PER2, NKX2-1, CHRNA7, NFIL3	1.55499	1	0.66457	71.2584
GO:0060078~regulation of postsynaptic membrane potential	0.0662361	1.17891	GRIN2B, ADORA2A, GRIN2D, GRIN2A, CHRNA4, CDK5, DMPK	2.37049	1	0.663797	71.3522
GO:0031344~regulation of cell projection organization	0.0671699	1.17283	RTN4, KLK8, METRN, SEMA4F, MAPT, RAC1, SEMA4D, MTOR, SYNGAP1, CDH4, CACNA1A, EPHB2	1.78232	1	0.667383	71.8703
GO:0008219~cell death	0.0707558	1.15024	SGPP1, FASTK, RNF216, PDCD4, TGFB2, PDCD2, CTNNBL1, GPX1, MAP3K5, SLK, UNC5B, ANK2, UNC5A, BAG2, RHOB, UNC5D, NGFRAP1, UNC5C, LUC7L3, SGK1, AIFM1, SCN2A1, NDUFA13, BCL2L12, STK4, CDK5, AHR, DDIT4, PDCL3, HIPK2, ERN1, SIAH2, PDCD6IP, MAPK7, FAIM2, C1D, BLCAP, SIVA1, PHLPP1, PACS2, ADAMTSL4, CLU, YPEL3, MMD, RRAGA, KIT, 2610018G03RIK, BCL2, DAD1, DYRK2, AATK, TRAF3, HIP1, KLK8, LYZ2, VAC14, HTT, MS…	1.20228	1	0.685354	73.7788
GO:0055065~metal ion homeostasis	0.0709569	1.14901	CAV1, SLC8A1, SGK1, CLSTN1, PTH1R, FKBP1B, KDR, ATP2B2, ATP2A2, APOE, BCL2, AVPR1A, RYR2, EPOR, STC1, CACNA1C, CACNA1A, GPR12, MT3	1.5175	1	0.68473	73.8821
GO:0043267~negative regulation of potassium ion transport	0.0710051	1.14871	NOS1, KCNA5, HTR2A	6.34953	1	0.683297	73.9068
GO:0033363~secretory granule organization	0.0710051	1.14871	BLOC1S3, LYST, DTNBP1	6.34953	1	0.683297	73.9068
GO:0051642~centrosome localization	0.0710051	1.14871	SEMA6A, NDEL1, PLXNA2	6.34953	1	0.683297	73.9068
GO:0046037~GMP metabolic process	0.0710051	1.14871	IMPDH1, GMPS, IMPDH2	6.34953	1	0.683297	73.9068
GO:0045859~regulation of protein kinase activity	0.0710973	1.14815	CAV1, ADORA2A, CSPG4, ZEB2, PRDX2, KIT, PDCD4, SPRY4, LATS2, MAP3K5, DGKG, NPM1, PDGFC, MAPKBP1, AGK, MDFI, TNXB, MAP2K1, PICK1, CENPE, RB1, SOD1, CDK5, GRM1, ERN1, DGKZ, LRP8, MTOR, HTR2A, VLDLR	1.36549	1	0.682105	73.954
GO:0051325~interphase	0.0719641	1.14288	ANP32B, CCND2, BCL2, CDC123, POLA1, CAMK2B, ID4, RB1, RPS6, RHOU, LATS2	1.82601	1	0.685011	74.3938
GO:0000122~negative regulation of transcription from RNA polymerase II promoter	0.0719996	1.14267	BMI1, JDP2, SOX2, ZEB1, MXI1, NPAS1, ZKSCAN17, PER2, NKX2-1, BCL6, OLIG2, RARB, NFX1, NR2F1, MDFI, WDTC1, RARG, IKZF1, KLF12, SAMD11, SKI, RB1, MBD3, RBBP7, MYPOP, NRIP1, FOXP2, CTNNBIP1, HDAC4, NCOA2, HIPK2, JAZF1, HIVEP1, ZFPM1, NFIC, HDAC9	1.31938	1	0.683532	74.4117
GO:0050768~negative regulation of neurogenesis	0.0721889	1.14153	RTN4, LINGO1, KLK8, NOG, SEMA4F, ID4, SYNGAP1, EPHB2, MT3	2.00512	1	0.682865	74.5067
GO:0048747~muscle fiber development	0.0721889	1.14153	CAV2, GPX1, DNER, TNC, UTRN, P2RX2, MYH6, CACNG2, AGRN	2.00512	1	0.682865	74.5067
GO:0000165~MAPKKK cascade	0.0755097	1.122	MDFI, CAV1, RET, MAP2K1, MAP2K4, CSPG4, PRDX2, FGF12, SMAD1, SOD1, GRM1, MAP3K5, DOK4, MAPK8IP2, MAPK9, ROR2, MAPK8IP1, ADRA2B, MAPKBP1, MAP2K5	1.48527	1	0.698185	76.1207
GO:0048741~skeletal muscle fiber development	0.0755546	1.12174	CAV2, GPX1, DNER, TNC, UTRN, P2RX2, CACNG2, AGRN	2.11651	1	0.696776	76.1419
GO:0022402~cell cycle process	0.0768747	1.11422	GAS2L3, SPIN1, RHOU, LATS2, RSPH1, PSMC3IP, STAG2, KIF11, ANP32B, PAPD7, NUSAP1, RB1, DCTN3, VASH1, TACC2, PPP1CA, REC8, CHMP1A, CCND2, ERN1, ARL8A, DST, HAUS1, POLA1, CETN3, NEDD9, ZFP318, SYCP1, MLF1, SPC25, BCL2, CYP26B1, NPM1, CDC123, MNS1, PKD1, CAMK2B, CLASP1, MAP2K1, MSH2, DLGAP5, RPL24, CDC20, GAS2, CENPE, CEP63, CDC26, RACGAP1, RPS6, SMC4, CENPH, FSD1, TEX15, CKS2, GAS2L1, ID4, TXNL4A	1.2279	1	0.701665	76.7558
GO:0032886~regulation of microtubule-based process	0.076905	1.11405	XPO1, CTTNBP2, CAV1, MAPT, NPM1, CENPE, CLASP1, DST, TACC2, MAP6D1	1.88134	1	0.700198	76.7696
GO:0009124~nucleoside monophosphate biosynthetic process	0.076905	1.11405	ADCY2, ADCY8, ADCY6, GUCY1A2, GUCY1A3, GUCY1B3, IMPDH1, GMPS, IMPDH2, PFAS	1.88134	1	0.700198	76.7696
GO:0006875~cellular metal ion homeostasis	0.0769897	1.11357	CAV1, SLC8A1, SGK1, CLSTN1, PTH1R, FKBP1B, ATP2B2, ATP2A2, APOE, BCL2, AVPR1A, RYR2, EPOR, STC1, CACNA1C, CACNA1A, GPR12, MT3	1.52389	1	0.699003	76.8085
GO:0007519~skeletal muscle tissue development	0.077096	1.11297	CAV2, CAV1, TNC, UTRN, CACNG2, CDK5, FOXP2, GPX1, COL19A1, EP300, DMD, DNER, P2RX2, AGRN	1.64618	1	0.697919	76.8572
GO:0043087~regulation of GTPase activity	0.0774562	1.11094	GIT1, ARFGAP2, RAB3GAP2, TBC1D8, ASAP2, RABGAP1L, TBC1D22B, ADAP1, TBC1D25, SMAP1, NDEL1, RASGRF1, TBC1D5, GIT2, BCL6, MTOR, ARAP1	1.54756	1	0.698078	77.0214
GO:0042632~cholesterol homeostasis	0.0778773	1.10859	NPC1, CAV1, NPC2, LDLR, APOE, SCARB1, PEX5L	2.27932	1	0.69853	77.212
GO:0055092~sterol homeostasis	0.0778773	1.10859	NPC1, CAV1, NPC2, LDLR, APOE, SCARB1, PEX5L	2.27932	1	0.69853	77.212
GO:0043112~receptor metabolic process	0.0778773	1.10859	FUT8, DMD, PICK1, AGRN, SYNGAP1, CDK5, CACNA1A	2.27932	1	0.69853	77.212
GO:0060079~regulation of excitatory postsynaptic membrane potential	0.078027	1.10776	GRIN2B, ADORA2A, GRIN2D, GRIN2A, CDK5, DMPK	2.53981	1	0.697671	77.2793
GO:0048641~regulation of skeletal muscle tissue development	0.078027	1.10776	HDAC4, BTG1, BCL2, AGRN, HDAC9, BOC	2.53981	1	0.697671	77.2793
GO:0048009~insulin-like growth factor receptor signaling pathway	0.0799324	1.09728	IGF1R, GRB10, IRS1, PIK3R1	3.76269	1	0.705174	78.1208
GO:0048266~behavioral response to pain	0.0799324	1.09728	GRIN2B, P2RX2, SCN9A, CACNA1A	3.76269	1	0.705174	78.1208
GO:0042255~ribosome assembly	0.0799324	1.09728	EIF6, RPS14, RPL24, EIF2A	3.76269	1	0.705174	78.1208
GO:0006892~post-Golgi vesicle-mediated transport	0.0799324	1.09728	GOLGA7, NBEA, STEAP2, MON2	3.76269	1	0.705174	78.1208
GO:0048011~nerve growth factor receptor signaling pathway	0.0799324	1.09728	SOS1, BCAR1, LMTK2, BEX1	3.76269	1	0.705174	78.1208
GO:0015992~proton transport	0.0801191	1.09626	SLC36A1, ATP5J2, ATP5B, ATP5C1, ATP6V0A1, ATP5G2, ATP5G1, ATP5H, ATP5K, ATP6V1F, ATP5J	1.79089	1	0.704488	78.2016
GO:0016265~death	0.0802197	1.09572	SGPP1, FASTK, RNF216, PDCD4, TGFB2, PDCD2, CTNNBL1, GPX1, MAP3K5, SLK, UNC5B, ANK2, UNC5A, BAG2, RHOB, UNC5D, NGFRAP1, UNC5C, LUC7L3, SGK1, AIFM1, SCN2A1, NDUFA13, BCL2L12, STK4, CDK5, AHR, DDIT4, PDCL3, HIPK2, ERN1, SIAH2, PDCD6IP, MAPK7, FAIM2, C1D, BLCAP, SIVA1, PHLPP1, PACS2, ADAMTSL4, CLU, YPEL3, MMD, RRAGA, KIT, 2610018G03RIK, BCL2, DAD1, DYRK2, AATK, TRAF3, HIP1, KLK8, LYZ2, VAC14, HTT, MS…	1.19079	1	0.703403	78.2451
GO:0051336~regulation of hydrolase activity	0.0814539	1.08909	ARFGAP2, RAB3GAP2, CAV1, TBC1D8, ADORA2A, PTH1R, ASAP2, RABGAP1L, ADAP1, HSPA1L, SMAP1, GIT2, TBC1D5, BCL6, DHCR24, HIP1, GIT1, NOS1, MYH6, TBC1D22B, TBC1D25, NDEL1, RNF7, CHRM3, RASGRF1, BBC3, ERN1, ATPIF1, MTOR, ARAP1, HTR2A	1.33902	1	0.707589	78.7715
GO:0016358~dendrite development	0.0818615	1.08692	PPP1R9B, RAC1, GRIN3A, PRKG1, DCX, SYNGAP1, CDK5, CACNA1A, DCLK1	1.9537	1	0.707923	78.9426
GO:0009123~nucleoside monophosphate metabolic process	0.0822265	1.08499	ATP2B2, ADCY2, ADCY8, ADCY6, GUCY1A2, GUCY1A3, GUCY1B3, RORA, IMPDH1, GMPS, IMPDH2, PFAS	1.72191	1	0.70806	79.0948
GO:0051253~negative regulation of RNA metabolic process	0.0823758	1.0842	BMI1, JDP2, FOXK1, SOX2, HAT1, ZEB1, CBX1, MAF1, MXI1, NPAS1, ZKSCAN17, NPM1, PER2, NKX2-1, BCL6, OLIG2, RARB, NR2F1, NFX1, MDFI, WDTC1, CTBP2, RARG, IKZF1, KLF12, SAMD11, NDUFA13, SKI, RB1, MBD3, SPEN, RBBP7, MYPOP, NRIP1, FOXP2, CTNNBIP1, HDAC4, CHMP1A, NCOA2, HIPK2, JAZF1, HIVEP1, CUX2, ZFPM1, HDAC9, NFIC	1.25625	1	0.707214	79.1568
GO:0033554~cellular response to stress	0.085935	1.06583	HMGN1, XRCC3, PRDX2, 2310003H01RIK, FGF12, INTS3, NONO, GPX1, MAP1LC3A, SLK, GPX4, NSMCE1, GPX3, NSMCE2, CAT, MAPKBP1, FANCB, MT3, SGK1, ATG9A, GTF2H4, LIG3, ZSWIM7, DCLRE1C, XPA, FBXO18, HIPK2, ERN1, ROR2, MAPK9, RUVBL2, ING4, HMGB2, RAD23A, SHFM1, POLA1, KIN, SMUG1, HSPA1L, BCL2, DYRK2, HSPA5, ERCC3, NTHL1, APEX1, FEN1, MDFI, SSRP1, UPF1, SHPRH, MSH2, CEP63, SOD1, BBC3, AVPR1A, MAPK8IP2, MAPK8I…	1.21542	1	0.721524	80.5832
GO:0030183~B cell differentiation	0.0860819	1.06509	DCLRE1C, IKZF1, LRRC8A, MSH2, BCL2, CEBPG, BCL6, NFAM1, HDAC9, PIK3R1	1.84044	1	0.720661	80.64
GO:0010605~negative regulation of macromolecule metabolic process	0.0869115	1.06092	BMI1, NCBP1, JDP2, THRA, FOXK1, RBM3, HR, ZEB2, CBX1, ZEB1, MAF1, MXI1, PDCD4, RARB, OLIG2, NR2F1, NFX1, CTBP2, RARG, RCOR2, RELA, GRIN2A, NDUFA13, RB1, MBD3, SPEN, RBBP7, KCNQ1OT1, CDK5, MXD3, NRIP1, CTNNBIP1, INHBB, CHMP1A, NCOA2, HIPK2, NAB1, MAP3K10, CUX2, ZFPM1, C1D, BCLAF1, CAV1, GLIS2, SOX2, HAT1, NPAS1, MOV10, TNRC6C, ZKSCAN17, NPM1, PER2, NKX2-1, BCL6, TNRC6B, MDFI, WDTC1, IKZF1, KLF12, …	1.18792	1	0.722742	80.9581
GO:0007264~small GTPase mediated signal transduction	0.0878367	1.05632	RALGPS1, RAB3D, GNA12, IQGAP3, RASGEF1B, ARF5, RHOU, DIRAS2, SOS1, RAC1, RAPGEF6, RALB, RHOBTB2, RHOBTB1, RHOB, BCL6, RAB6B, RAPGEF2, RHOF, RAPGEF1, COX16, RAP2A, RABL3, BAIAP2, RAB4A, ARHGEF9, VAV2, ARL6, RASL11B, RND3, RAB30, RASGRF1, RRAS2, ARL8A, ARL4D, SYNGAP1, RAPGEFL1, NKIRAS2, BCAR3	1.27975	1	0.725198	81.307
GO:0006818~hydrogen transport	0.0888196	1.05149	SLC36A1, ATP5J2, ATP5B, ATP5C1, ATP6V0A1, ATP5G2, ATP5G1, ATP5H, ATP5K, ATP6V1F, ATP5J	1.7571	1	0.727858	81.671
GO:0055074~calcium ion homeostasis	0.0900575	1.04548	ATP2B2, SLC8A1, CAV1, ATP2A2, APOE, BCL2, CLSTN1, PTH1R, AVPR1A, RYR2, EPOR, STC1, CACNA1C, FKBP1B, GPR12, CACNA1A, KDR	1.51498	1	0.731524	82.1199
GO:0009628~response to abiotic stimulus	0.0902485	1.04456	HMGN1, TRPV2, RBM3, SOX2, KIT, INTS3, HSPA1L, ATP2B2, GPX1, TSC22D2, PDE1B, GRIN2B, GRIN2D, BCL2, RAC1, ACOT11, PKD1, ETV1, ERCC3, TUB, STX1A, VAC14, ACADM, MSH2, CRYAB, HTT, GRIN2A, ATP1A3, SOD1, CDK5, FOXP2, DCLRE1C, XPA, AVPR1A, COL1A1, PCSK1N, SYNGAP1, CACNA1C	1.28171	1	0.730853	82.1883
GO:0051168~nuclear export	0.0905919	1.04291	NUP133, NCBP1, XPO1, NPM1, LSG1, NXF1, HSPA9	2.1949	1	0.730809	82.3105
GO:0042311~vasodilation	0.0905919	1.04291	CTTNBP2, GPX1, ADORA2A, APOE, GUCY1A3, CFTR, SOD1	2.1949	1	0.730809	82.3105
GO:0030073~insulin secretion	0.0905919	1.04291	MYO5A, HTT, ILDR2, CACNA1C, FKBP1B, PCLO, IRS1	2.1949	1	0.730809	82.3105
GO:0009060~aerobic respiration	0.0905919	1.04291	SDHA, SDHB, IDH3G, SUCLG2, IDH2, IDH3B, CAT	2.1949	1	0.730809	82.3105
GO:0048168~regulation of neuronal synaptic plasticity	0.0905919	1.04291	LNPEP, EGR2, GRIN2B, RASGRF1, SYNGAP1, RIMS1, EPHB2	2.1949	1	0.730809	82.3105
GO:0042493~response to drug	0.0908685	1.04159	NOS1, ATP1A3, GRIN2A, CAR15, CFTR, SOD1, KCNJ11, GCLM, CTTNBP2, DGCR2, HMGCS2, BLOC1S3, LYST, BCL2, GNAS, HTR2A	1.53928	1	0.730494	82.4084
GO:0007172~signal complex assembly	0.0912888	1.03958	PICK1, AGRN, SYNGAP1, CDK5, CACNA1A	2.82201	1	0.730766	82.5562
GO:0035249~synaptic transmission, glutamatergic	0.0912888	1.03958	GRM2, ADORA2A, SHC3, CDK5, CACNA1A	2.82201	1	0.730766	82.5562
GO:0002028~regulation of sodium ion transport	0.0912888	1.03958	SGK1, SLC8A1, NOS1, NEDD4, DMPK	2.82201	1	0.730766	82.5562
GO:0050803~regulation of synapse structure and activity	0.0912888	1.03958	KLK8, PICK1, AGRN, NCAN, SYNGAP1	2.82201	1	0.730766	82.5562
GO:0042472~inner ear morphogenesis	0.0913415	1.03933	ATP2B2, KCNQ4, INSIG2, MAFB, DLX5, OTX1, FOXG1, SOX2, SOBP, DLL1, CELSR1, SOD1, COL11A1	1.64267	1	0.729546	82.5746
GO:0006633~fatty acid biosynthetic process	0.0914107	1.039	SCD1, MYO5A, SC5D, SCD2, FADS1, RNPEPL1, FADS3, ACACA, FADS6, OXSM, ALOX5AP, FASN, LTA4H, DEGS2, RNPEP	1.56779	1	0.728397	82.5988
GO:0060538~skeletal muscle organ development	0.0916039	1.03809	CAV2, CAV1, TNC, UTRN, CACNG2, CDK5, FOXP2, GPX1, COL19A1, EP300, DMD, DNER, P2RX2, AGRN	1.60168	1	0.727757	82.6662
GO:0032535~regulation of cellular component size	0.0918478	1.03693	RTN4, WDTC1, PLEK, FOXK1, NDUFA13, TMSB10, ARPC5, CDK4, CDH4, TGFB2, ATP2B2, CORO1A, BBC3, SEMA4F, TRO, BCL2, MAPT, LEFTY2, RAC1, NPM1, MTOR, DCX, CACNA1A, DCLK1, EMP1, SERTAD2	1.36719	1	0.727326	82.7509
GO:0010721~negative regulation of cell development	0.0922612	1.03498	RTN4, LINGO1, KLK8, NOG, SEMA4F, ID4, SYNGAP1, EPHB2, MT3	1.90486	1	0.727582	82.8936
GO:0046907~intracellular transport	0.0958696	1.01832	NCBP1, XPO1, ENAH, CLTB, USE1, NBEA, HOOK1, GOLGA7, AP1S2, DYNLL2, TRAK1, RHOB, SEC24D, RAMP1, COX16, NUP133, STX1A, ZDHHC3, PICK1, SPIRE1, ARNTL, MYH6, CDK5, NPC1, MYRIP, NPC2, NDEL1, CAMK1, STEAP2, STX5A, DST, KPNA1, COPE, SEC61G, MYO5A, PACS1, MTX1, CACNB1, RPL38, RIMS1, FKBP1B, TOMM7, BCL2, NPM1, LSG1, MLXIP, EHD1, APBA1, HSPA9, SEC61A2, HTT, NXF1, MON2, YWHAG, AP2A1, TOM1L2, SYTL5, XPO7, GGA…	1.19821	1	0.740385	84.0923
GO:0010720~positive regulation of cell development	0.0958824	1.01826	METRN, SERPINF1, MAPT, BCL2, SOX2, FOXG1, BEX1, SEMA4D, CDH4, EPHB2	1.80129	1	0.739047	84.0965
GO:0010975~regulation of neuron projection development	0.0958824	1.01826	RTN4, KLK8, METRN, SEMA4F, MAPT, SEMA4D, SYNGAP1, CDH4, CACNA1A, EPHB2	1.80129	1	0.739047	84.0965
GO:0001649~osteoblast differentiation	0.0958824	1.01826	HDAC4, NOG, JUND, PTH1R, FHL2, COL1A1, SMAD1, RPS27A, BMP6, IGFBP5	1.80129	1	0.739047	84.0965
GO:0008360~regulation of cell shape	0.0958824	1.01826	FGD1, PALM, CORO1A, CDC42EP2, SHROOM3, GNA12, PALM2, CFDP1, GAS2, RHOU	1.80129	1	0.739047	84.0965
GO:0009100~glycoprotein metabolic process	0.0962085	1.01679	B3GALT2, FUT8, B3GALT5, FUT11, IDE, FUT10, GLCE, ST3GAL1, CSGALNACT1, SLC4A10, MGAT3, ST3GAL5, LARGE, CHST12, ST8SIA5, BACE1, TRAK1, HS6ST1, B3GNT2, UGGT2, COL11A1, UNC13A, GALNT13, DHCR24	1.38221	1	0.738916	84.2008
GO:0007568~aging	0.099217	1.00341	MSH2, HTT, ZMIZ1, BCL2, PTH1R, NPM1, MNT, SOD1, CALR, PDCD4, AGPAT1, HTR2A	1.66545	1	0.748858	85.1331
GO:0045893~positive regulation of transcription, DNA-dependent	0.0993276	1.00293	CHURC1, THRA, FOXK1, STAT5B, RORB, RORA, ZEB1, CNOT7, RARB, TOP2A, SERTAD2, SOX10, RARG, EGR2, RELA, ARNTL, RB1, AHR, EP300, NCOA2, MTF1, ZMIZ1, HIPK2, ABLIM1, FUS, HMGB2, CAMTA2, CNBP, SOX2, NFYB, NFYA, SOX8, NPAS2, NKX2-1, AGRN, POU3F1, NFATC2, BCKDHA, KLF6, IKZF2, IKZF1, KLF12, MAFB, KLF13, CREBBP, ESRRG, NR4A2, AFF1, SMAD1, ISL1, HDAC4, DLX6OS1, NOTCH1, PKNOX1, CSRNP1, NFIC, PBX2, NFIA, NFIB	1.20071	1	0.747907	85.1663

## Sheet: IPA Biofunctions
Thap1+/- Striatum vs WT Striatum
Categories	Diseases or Functions Annotation	p-Value	Predicted Activation State	Activation z-score	Flags	Molecules	# Molecules
Cell Morphology, Cellular Assembly and Organization, Cellular Function and Maintenance	extension of cellular protrusions	0.000816		1.195		CDH4,DPYSL2,DPYSL5,HMGB2,MAP1B,NFIA,OLFM1,TRPC5	8
Cancer, Neurological Disease, Organismal Injury and Abnormalities	brain gliomatosis	0.00137				ADCY8,AK5,CILP2,GPX1,HMGN1,MAP4,MDGA1,MMP15,PCBP2,PIEZO1,PIK3R1,POLA1,PROKR2,RBMX,SV2B,SYNM	16
Cell Morphology, Cellular Assembly and Organization, Cellular Function and Maintenance	extension of plasma membrane projections	0.00348				DPYSL2,DPYSL5	2
Cell-To-Cell Signaling and Interaction, Molecular Transport, Small Molecule Biochemistry	release of neurotransmitter	0.00407				ADRA2A,ADRA2C,PPP3CC,SYN1	4
Cancer, Neurological Disease, Organismal Injury and Abnormalities	brain astrocytoma	0.00451				ADCY8,AK5,CILP2,GPX1,MAP4,MDGA1,MMP15,PCBP2,PIEZO1,PIK3R1,PROKR2,RBMX,SV2B,SYNM	14
Cellular Development, Cellular Growth and Proliferation, Nervous System Development and Function, Tissue Development	outgrowth of neurites	0.00461		1.309	bias	ANGPT1,DPYSL2,DPYSL5,KIT,MAP1B,MAP3K5,MIB1,NFIA,PROKR2,SYN1,TRPC5	11
Cell-To-Cell Signaling and Interaction	synaptic depression	0.00666		1.067		ADCY8,DPYSL5,MAP1B,PREX1,RAP2A,SYN1	6
Cellular Development, Cellular Growth and Proliferation, Nervous System Development and Function, Tissue Development	outgrowth of axons	0.00768				DPYSL2,MAP1B,NFIA,PROKR2,SYN1	5
Cell-To-Cell Signaling and Interaction, Nervous System Development and Function	long term depression of synapse	0.00843				DPYSL5,MAP1B,PREX1,RAP2A	4
Cell Morphology, Cellular Assembly and Organization, Cellular Development, Cellular Function and Maintenance, Cellular Growth and Proliferation, Nervous System Development and Function, Tissue Development	polarization of neurons	0.00934				DPYSL2,MAP1B	2
Cell Morphology, Cellular Assembly and Organization, Cellular Function and Maintenance, Nervous System Development and Function	extension of axons	0.00996		1.982		CDH4,MAP1B,NFIA,OLFM1,TRPC5	5
Cell-To-Cell Signaling and Interaction, Nervous System Development and Function	firing of central nervous system cells	0.0108				KCNS1,RBFOX1	2
Cell-To-Cell Signaling and Interaction, Drug Metabolism, Molecular Transport, Small Molecule Biochemistry	release of norepinephrine	0.0108				ADRA2A,ADRA2C	2
Developmental Disorder, Hereditary Disorder, Metabolic Disease, Neurological Disease, Organismal Injury and Abnormalities	Mitochondrial complex I deficiency of brain	0.0114				NDUFS6	1
Cellular Movement, Nervous System Development and Function	arrest in migration of facial branchiomotor neurons	0.0114				MAFB	1
Lipid Metabolism, Small Molecule Biochemistry	conjugation of arachidonic acid	0.0114				FAAH	1
Cell-To-Cell Signaling and Interaction, Cellular Assembly and Organization, Cellular Development, Cellular Function and Maintenance, Cellular Growth and Proliferation, Nervous System Development and Function, Tissue Development	delay in formation of synapse	0.0114				SYN1	1
Cellular Development, Cellular Growth and Proliferation, Nervous System Development and Function, Tissue Development	delay in outgrowth of axons	0.0114				SYN1	1
Cell Morphology, Nervous System Development and Function, Tissue Morphology	diameter of primary dendrite	0.0114				DPYSL5	1
Organismal Injury and Abnormalities, Skeletal and Muscular Disorders	dysfunction of hindlimb	0.0114				PNPLA6	1
Cell Morphology, Cellular Assembly and Organization	enlargement of endoplasmic reticulum	0.0114				USE1	1
Cell-To-Cell Signaling and Interaction, Nervous System Development and Function	excitation of postsynaptic region	0.0114				PCDH8	1
Cell-To-Cell Signaling and Interaction, Nervous System Development and Function	firing of dorsal root ganglion cells	0.0114				KCNS1	1
Cellular Development, Cellular Growth and Proliferation, Nervous System Development and Function, Tissue Development	formation of sling cells	0.0114				NFIA	1
Cellular Assembly and Organization	growth of filopodia	0.0114				DPYSL5	1
Cancer, Gastrointestinal Disease, Neurological Disease, Organismal Injury and Abnormalities	hyperplasia of myenteric plexus	0.0114				KIT	1
Cellular Function and Maintenance	hyperpolarization of melanin concentrating hormone neuron	0.0114				ADRA2A	1
Lipid Metabolism, Molecular Transport, Small Molecule Biochemistry	internalization of anandamide	0.0114				FAAH	1
Cellular Compromise, Neurological Disease, Organismal Injury and Abnormalities	lesioning of sensory axons	0.0114				PNPLA6	1
Endocrine System Development and Function, Lipid Metabolism, Small Molecule Biochemistry	metabolism of anandamide	0.0114				FAAH	1
Cellular Movement, Nervous System Development and Function	migration of sling cells	0.0114				NFIA	1
Cell Morphology, Cellular Assembly and Organization, Cellular Development, Cellular Growth and Proliferation, Nervous System Development and Function, Tissue Development	morphogenesis of growth cone	0.0114				MAP1B	1
Cell-To-Cell Signaling and Interaction, Nervous System Development and Function	paired-pulse inhibition	0.0114				CACNA1G	1
Cellular Assembly and Organization, Cellular Function and Maintenance, Tissue Development	polymerization of microtubules	0.0114				MAP1B	1
Nervous System Development and Function, Organ Development	presence of corpus callosum	0.0114				NFIA	1
Cell Morphology, Cellular Assembly and Organization, Nervous System Development and Function, Tissue Morphology	size of mossy fiber boutons	0.0114				SYN1	1
Cell Morphology, Cellular Compromise, Nervous System Development and Function, Neurological Disease, Organismal Injury and Abnormalities, Tissue Morphology	swelling of motor axons	0.0114				PNPLA6	1
Cell Morphology, Cellular Compromise, Nervous System Development and Function, Neurological Disease, Organismal Injury and Abnormalities, Tissue Morphology	swelling of sensory axons	0.0114				PNPLA6	1
Cell Morphology, Cellular Assembly and Organization, Cellular Function and Maintenance, Nervous System Development and Function	extension of neurites	0.0115	Increased	2.219		CDH4,HMGB2,MAP1B,NFIA,OLFM1,TRPC5	6
Nervous System Development and Function, Neurological Disease, Organ Morphology, Organismal Development, Organismal Injury and Abnormalities	abnormal morphology of hippocampal commissure	0.0124				MAP1B,NFIA	2
Cell-To-Cell Signaling and Interaction, Nervous System Development and Function	long term depression	0.0135		1.964		ADCY8,DPYSL5,MAP1B,PREX1,RAP2A	5
Molecular Transport, Small Molecule Biochemistry	release of catecholamine	0.0138				ADRA2A,ADRA2C,SYN1	3
Cellular Growth and Proliferation, Tissue Development	generation of cells	0.015		1.939		DPYSL2,DPYSL5,HMGB2,KIT,MAFB,MAP1B,MICALL1,NFIA,NRG3,PCDH8,PIEZO1,PREX1,RAP2A,SNAP91,SULF2,SYN1,TRPC5,UNC5A,WASF3	19
Metabolic Disease, Neurological Disease, Organismal Injury and Abnormalities, Psychological Disorders	Alzheimer disease	0.0153				CRABP1,DPYSL2,FAAH,GABBR2,GRIN2A,PREX1,SNAP91	7
Neurological Disease, Organismal Injury and Abnormalities	seizure disorder	0.0165				LUC7L3,MAP1B,RBFOX1	3
Nervous System Development and Function, Neurological Disease, Organ Morphology, Organismal Development, Organismal Injury and Abnormalities	lack of corpus callosum	0.0176				MAP1B,NFIA	2
Cell-To-Cell Signaling and Interaction, Cellular Assembly and Organization, Nervous System Development and Function	association of synaptic vesicles	0.0227				SYN1	1
Cell-To-Cell Signaling and Interaction, Cellular Assembly and Organization, Nervous System Development and Function, Tissue Morphology	density of inhibitory synapse	0.0227				MDGA1	1
Cell Morphology, Cellular Assembly and Organization, Cellular Development, Cellular Function and Maintenance, Cellular Growth and Proliferation, Nervous System Development and Function, Tissue Development	development of callosal axon	0.0227				NFIA	1
Embryonic Development, Nervous System Development and Function, Organ Development, Organismal Development, Tissue Development	development of pontine nucleus	0.0227				MAP1B	1
Cellular Development, Nervous System Development and Function, Tissue Development	differentiation of neuron-like cells	0.0227				EZH2	1
Cell-To-Cell Signaling and Interaction, Cellular Growth and Proliferation, Nervous System Development and Function	excitation of dopaminergic neurons	0.0227				FAAH	1
Cell Morphology, Cellular Assembly and Organization, Cellular Function and Maintenance, Nervous System Development and Function	extension of parallel fiber	0.0227				NFIA	1
Nervous System Development and Function, Tissue Development	formation of axon bundle	0.0227				MAP1B	1
Cell-To-Cell Signaling and Interaction, Cellular Assembly and Organization, Nervous System Development and Function	induction of axons	0.0227				DPYSL2	1
Inflammatory Response, Neurological Disease	inflammation of white matter	0.0227				KIT	1
Cell-To-Cell Signaling and Interaction, Nervous System Development and Function	long term depression of excitatory synapses	0.0227				DPYSL5	1
Cell-To-Cell Signaling and Interaction, Cellular Assembly and Organization, Nervous System Development and Function	modulation of synapse	0.0227				PCDH8	1
Cell-To-Cell Signaling and Interaction, Nervous System Development and Function	posttetanic potentiation of hippocampal neurons	0.0227				SYN1	1
Cell-mediated Immune Response, Cellular Development, Cellular Function and Maintenance, Cellular Growth and Proliferation, Embryonic Development, Hematological System Development and Function, Hematopoiesis, Lymphoid Tissue Structure and Development, Organ Development, Organismal Development, Tissue Development	production of TREG cells	0.0227				KIT	1
Embryonic Development, Tissue Morphology	quantity of intermediate progenitor cells	0.0227				TRNP1	1
Behavior	rearing	0.0227				ADRA2A	1
Molecular Transport, Protein Trafficking	transport of reporter protein	0.0227				MAP1B	1
Cardiovascular System Development and Function	vasoconstriction of afferent arterioles	0.0227				AVPR1A	1
Cell-To-Cell Signaling and Interaction, Cellular Growth and Proliferation, Nervous System Development and Function	excitation of neurons	0.0274				FAAH,KCNS1,RBFOX1	3
Lipid Metabolism, Molecular Transport, Small Molecule Biochemistry	concentration of eicosanoid	0.0281				FAAH,GPX1	2
Cellular Assembly and Organization, Nervous System Development and Function	recycling of synaptic vesicles	0.0304				DNAJC6,SYN1	2
Neurological Disease, Psychological Disorders	bipolar I disorder	0.0339				GRIN2A	1
Cellular Assembly and Organization, Cellular Function and Maintenance	bundling of microtubules	0.0339				MAP1B	1
Cellular Development, Nervous System Development and Function, Tissue Development	differentiation of axons	0.0339				MDGA1	1
Nervous System Development and Function, Organ Morphology	dilation of cerebral ventricles	0.0339				NFIA	1
Cell-To-Cell Signaling and Interaction, Cellular Assembly and Organization, Cellular Development, Cellular Function and Maintenance, Cellular Growth and Proliferation, Nervous System Development and Function, Tissue Development	formation of ribbon synapse	0.0339				MAFB	1
Cell Morphology, Cellular Assembly and Organization, Cellular Development, Cellular Function and Maintenance, Cellular Growth and Proliferation, Nervous System Development and Function, Tissue Development	formation of supernumerary axons	0.0339				DPYSL2	1
Embryonic Development, Nervous System Development and Function	segmentation of brain	0.0339				MAFB	1
Cell-To-Cell Signaling and Interaction, Cellular Assembly and Organization	stabilization of tight junctions	0.0339				TJP3	1
Nervous System Development and Function, Neurological Disease, Organ Morphology, Organismal Development, Organismal Injury and Abnormalities	abnormal morphology of cerebral cortex	0.0344				ARL6,CACNG8,GPR37,MAP1B,NFIA,SYN1	6
Cell-To-Cell Signaling and Interaction, Cellular Assembly and Organization, Cellular Function and Maintenance	assembly of intercellular junctions	0.0368				MAFB,NFIA,PCDH8,SYN1,TJP3	5
Cellular Assembly and Organization	formation of plasma membrane	0.0368				MAFB,NFIA,PCDH8,SYN1,TJP3	5
Cellular Movement, Nervous System Development and Function	migration of neurons	0.0394				KIT,MAFB,MAP1B,NFIA,PREX1	5
Cell Morphology, Cellular Assembly and Organization, Cellular Development, Cellular Function and Maintenance, Cellular Growth and Proliferation, Nervous System Development and Function, Tissue Development	formation of dendrites	0.0411				MAP1B,NFIA,PREX1,RAP2A,TRPC5	5
Auditory Disease, Cell Death and Survival, Cellular Compromise, Neurological Disease, Organismal Injury and Abnormalities, Tissue Morphology	neurodegeneration of outer hair cells	0.0432				GPX1,KCNQ4	2
Nervous System Development and Function, Neurological Disease, Organ Morphology, Organismal Development, Organismal Injury and Abnormalities	abnormal morphology of cingulate gyrus	0.045				MAP1B	1
Nervous System Development and Function, Neurological Disease, Organ Morphology, Organismal Development, Organismal Injury and Abnormalities	abnormal morphology of parietal lobe	0.045				MAP1B	1
Cell-To-Cell Signaling and Interaction, Nervous System Development and Function	depotentiation of synapse	0.045				ADCY8	1
Cellular Development, Embryonic Development, Organismal Development, Tissue Development	differentiation of mesenchymal stem cells	0.045				EZH2	1
Cell-To-Cell Signaling and Interaction, Nervous System Development and Function	firing of Purkinje cells	0.045				RBFOX1	1
Embryonic Development, Nervous System Development and Function, Organ Development, Organismal Development, Tissue Development	formation of hippocampal commissure	0.045				NFIA	1
Gene Expression	repression of RNA	0.045				HMGB2	1
Cell Morphology	size of brain cancer cell lines	0.045				SYNM	1
Inflammatory Disease, Inflammatory Response, Neurological Disease, Organ Morphology, Organismal Injury and Abnormalities	swelling of brain	0.045				KIT	1
Neurological Disease, Psychological Disorders	Schizophrenia	0.0489				GPR37,GRIN2A,OLFM1,PCDH8,PIK3R1,SYT7	6
Cell Morphology, Cellular Compromise	collapse of growth cone	0.0494				DPYSL2,RGMA,TRPC5	3

## Sheet: List of DEGs (Log2 Ratio)
Thap1+/- Striatum vs WT Striatum
symbol	log2 FC	pvalue	padj		TOTAL (n = 2450) p ≤ 0.05	UP (n = 1393) p ≤ 0.05	DOWN (n = 1057) p ≤ 0.05
Sycp1	2.43519	4.886e-35	6.56435e-31		Sycp1	Sycp1	Shprh
Scand1	1.27087	5.0192e-16	3.37164e-12		Scand1	Scand1	Calr
6530402F18Rik	0.984885	5.73132e-07	0.000962503		6530402F18Rik	6530402F18Rik	Papola
Piezo1	0.962269	3.91513e-07	0.000876663		Piezo1	Piezo1	Arpp19
Bcl6	0.960254	1.21916e-06	0.00148903		Bcl6	Bcl6	Sf3b3
Avpr1a	0.901054	5.19514e-06	0.00395873		Avpr1a	Avpr1a	Snrnp70
Cpne4	0.888703	9.78195e-09	3.28551e-05		Cpne4	Cpne4	Zbtb33
Podn	0.854589	1.86763e-05	0.00760352		Podn	Podn	Kpna1
Tfap2d	0.839837	2.59692e-05	0.00996847		Tfap2d	Tfap2d	Tspyl1
Lypd6b	0.823254	5.5985e-06	0.00395873		Lypd6b	Lypd6b	Wdr48
Nov	0.812439	1.06977e-05	0.00598849		Nov	Nov	Ncbp1
Mdga1	0.811728	1.26356e-05	0.00628739		Mdga1	Mdga1	Cttn
Adcy8	0.795961	1.61373e-05	0.00722681		Adcy8	Adcy8	March7
Hs3st2	0.794992	5.07809e-05	0.014357		Hs3st2	Hs3st2	Son
Kcns1	0.792645	1.66716e-06	0.00186652		Kcns1	Kcns1	Spin1
2900026A02Rik	0.789523	4.72393e-06	0.00395873		2900026A02Rik	2900026A02Rik	Hspa9
Gpr37	0.785606	3.59185e-05	0.012691		Gpr37	Gpr37	Sdha
Cnih3	0.783377	4.62428e-07	0.000887532		Cnih3	Cnih3	Srsf1
Hist2h3b	0.768829	8.64048e-08	0.00023217		Hist2h3b	Hist2h3b	Bclaf1
Rgma	0.762061	3.85578e-05	0.012691		Rgma	Rgma	Tro
Nrg3	0.756436	6.82881e-05	0.0158181		Nrg3	Nrg3	Fbxl5
Cacna1g	0.754613	4.89281e-05	0.0142902		Cacna1g	Cacna1g	Dmtf1
Adra2a	0.739785	0.000149835	0.025163		Adra2a	Adra2a	Fhl1
Disp2	0.739141	2.40985e-05	0.00952246		Disp2	Disp2	Nxf1
Rapgefl1	0.733265	9.99355e-05	0.0209787		Rapgefl1	Rapgefl1	Rnf4
Pitpnm3	0.732783	5.24054e-05	0.014357		Pitpnm3	Pitpnm3	Tardbp
Plvap	0.726744	0.000215336	0.0301668		Plvap	Plvap	Pgrmc1
Sulf2	0.721176	1.32223e-05	0.00634433		Sulf2	Sulf2	Arfgap2
Cdh4	0.705875	1.456e-05	0.00674527		Cdh4	Cdh4	Nfx1
Sh3rf3	0.70197	3.75164e-05	0.012691		Sh3rf3	Sh3rf3	Rbl2
Fstl4	0.696025	0.000266857	0.0320109		Fstl4	Fstl4	Pin1
Plekhh3	0.694043	5.34313e-05	0.014357		Plekhh3	Plekhh3	Gmps
Unc5a	0.686462	0.000496274	0.0423525		Unc5a	Unc5a	Ebna1bp2
Dgkg	0.684549	0.000501465	0.0423525		Dgkg	Dgkg	Ik
Sh2d7	0.68268	0.000139615	0.0242823		Sh2d7	Sh2d7	U2surp
Mafb	0.681167	0.000344913	0.0376741		Mafb	Mafb	Orc6
Grin2a	0.678951	0.000263516	0.0318949		Grin2a	Grin2a	Pcmtd2
Kcnmb2	0.670646	0.000206513	0.0301576		Kcnmb2	Kcnmb2	Fkbp4
Frzb	0.668839	0.00075324	0.0508836		Frzb	Frzb	Cuedc2
Ifi30	0.664745	0.000177263	0.0276922		Ifi30	Ifi30	Aamp
Plch2	0.662696	0.000111949	0.023139		Plch2	Plch2	Commd3
Nrg3os	0.657064	0.000810773	0.0517277		Nrg3os	Nrg3os	Mtus1
Klf2	0.656312	0.000715645	0.0495602		Klf2	Klf2	Sf3b1
St8sia5	0.656033	0.000499962	0.0423525		St8sia5	St8sia5	Eif3g
Samd5	0.65505	6.36205e-05	0.0154486		Samd5	Samd5	Lsg1
Gpr22	0.654608	0.000223333	0.0306171		Gpr22	Gpr22	Dhx15
Nrgn	0.654332	0.00101208	0.0550564		Nrgn	Nrgn	Pick1
Trpc5	0.649616	0.000354467	0.0377957		Trpc5	Trpc5	Metap2
Angpt1	0.64949	4.33397e-05	0.0135411		Angpt1	Angpt1	Trmt1
Adamtsl1	0.647612	0.000548424	0.0435981		Adamtsl1	Adamtsl1	Idh2
Krt12	0.643015	0.000937438	0.0536771		Krt12	Krt12	Zfp266
Rasip1	0.641784	0.00012566	0.0242823		Rasip1	Rasip1	Aasdhppt
Ppm1h	0.641613	1.24563e-05	0.00628739		Ppm1h	Ppm1h	Fsd1
Ltbp4	0.639903	0.00125703	0.0611891		Ltbp4	Ltbp4	Mrto4
Faah	0.638824	0.000258496	0.0318615		Faah	Faah	Cnot2
Tspan17	0.636163	0.000196841	0.0294679		Tspan17	Tspan17	Armc10
Nav2	0.635663	0.00141994	0.0658221		Nav2	Nav2	Cdk5
Cntn2	0.631529	0.00152947	0.0666056		Cntn2	Cntn2	Uba2
Tjp3	0.62823	0.000151793	0.025177		Tjp3	Tjp3	Ddx39b
D630041G03Rik	0.62783	0.00151222	0.0663076		D630041G03Rik	D630041G03Rik	Arhgef9
Pla2g3	0.627805	0.00127098	0.061423		Pla2g3	Pla2g3	Nolc1
Zbtb8b	0.627143	0.00146729	0.0663076		Zbtb8b	Zbtb8b	Ift74
Etl4	0.625712	0.000714322	0.0495602		Etl4	Etl4	Mrpl11
Ppm1e	0.624851	0.000288553	0.0325773		Ppm1e	Ppm1e	Manf
Bean1	0.624574	0.00054483	0.0435726		Bean1	Bean1	Luc7l3
Dmrta2	0.623271	0.00159629	0.0682301		Dmrta2	Dmrta2	Dad1
Sobp	0.622577	0.000505886	0.0423525		Sobp	Sobp	Stag2
Adcy2	0.617036	0.000385792	0.0393322		Adcy2	Adcy2	Nedd4
Ccdc129	0.616134	0.00158289	0.0679428		Ccdc129	Ccdc129	Nop56
AU022754	0.61422	0.0017295	0.0699249		AU022754	AU022754	Hspa5
Ankrd35	0.613044	0.00113485	0.0581713		Ankrd35	Ankrd35	Dnajc10
Pcsk1n	0.611359	0.00104355	0.055857		Pcsk1n	Pcsk1n	Fam216a
Fam57a	0.610731	0.000384436	0.0393322		Fam57a	Fam57a	Nhlrc2
Olfm1	0.607565	0.000212709	0.0301668		Olfm1	Olfm1	Cebpz
Kcnc4	0.606009	0.00192452	0.073665		Kcnc4	Kcnc4	Cltb
Mmp15	0.605246	0.00023577	0.0308932		Mmp15	Mmp15	Sf3b6
Arid3a	0.605201	6.43931e-05	0.0154486		Arid3a	Arid3a	Wdr43
Sh3d19	0.603808	0.000431685	0.0405572		Sh3d19	Sh3d19	Sumo1
Adamts18	0.60311	0.000139947	0.0242823		Adamts18	Adamts18	Ssrp1
Hcn1	0.602949	0.000943403	0.0536771		Hcn1	Hcn1	Pnisr
Camta2	0.601225	0.000609052	0.0467578		Camta2	Camta2	Pdcl3
Baiap2l2	0.600982	0.00219165	0.0777501		Baiap2l2	Baiap2l2	Cox7b
Ntng2	0.600868	0.00117735	0.0592425		Ntng2	Ntng2	Matr3
Fam189a1	0.598304	0.00225844	0.0780005		Fam189a1	Fam189a1	Lrrc40
Gabbr2	0.597375	2.79715e-05	0.0104388		Gabbr2	Gabbr2	Stx5a
Frmpd1	0.597069	0.000253999	0.031597		Frmpd1	Frmpd1	Idh3b
Cpne6	0.596662	0.00111165	0.0576643		Cpne6	Cpne6	Ccnl1
Dner	0.59432	3.74825e-05	0.012691		Dner	Dner	Ndel1
Dlk2	0.594152	0.00107973	0.0571111		Dlk2	Dlk2	Mtx1
Dlgap1	0.593646	4.62014e-05	0.0141072		Dlgap1	Dlgap1	Clns1a
Lpl	0.591573	0.00148626	0.0663076		Lpl	Lpl	Nhp2l1
Kit	0.590301	5.91806e-05	0.0152902		Kit	Kit	Haghl
Fosl2	0.590189	8.49224e-06	0.00549049		Fosl2	Fosl2	Zfp422
Adamtsl4	0.58952	0.00113875	0.0581713		Adamtsl4	Adamtsl4	Sgpp1
Kcnn1	0.588934	0.0004864	0.0423525		Kcnn1	Kcnn1	Rsl1d1
Cav1	0.588328	0.00111037	0.0576643		Cav1	Cav1	G3bp1
Col15a1	0.587143	0.00277858	0.0837		Col15a1	Col15a1	Phip
Syn1	0.585938	0.000507536	0.0423525		Syn1	Syn1	Dock11
Nrip3	0.585599	0.00120336	0.0593885		Nrip3	Nrip3	Slk
Lypd6	0.584708	0.00314287	0.0877848		Lypd6	Lypd6	Cnot6
Rras2	0.583603	0.00146379	0.0663076		Rras2	Rras2	Ccdc106
Fam43b	0.581753	0.000116026	0.0236184		Fam43b	Fam43b	Ddx5
Npas1	0.578457	0.000698367	0.0494677		Npas1	Npas1	Msh2
Epha5	0.577355	0.00363776	0.0949954		Epha5	Epha5	Crbn
Cilp2	0.574841	0.000185967	0.0285249		Cilp2	Cilp2	Wbp4
Kcnk9	0.571429	0.00393718	0.0974145		Kcnk9	Kcnk9	Atp5b
Cux2	0.570995	0.00366339	0.0949954		Cux2	Cux2	Arhgap12
Dpysl5	0.57005	0.000336095	0.0370118		Dpysl5	Dpysl5	Zfp955b
Ptpre	0.568933	0.00275146	0.0834534		Ptpre	Ptpre	Tmem169
Nfia	0.567195	0.000377413	0.0393322		Nfia	Nfia	Sdhb
Flrt1	0.566363	0.00310172	0.0874367		Flrt1	Flrt1	Akap1
Vsig2	0.566288	0.0041078	0.0994005		Vsig2	Vsig2	Gadd45gip1
Gm16523	0.56611	0.00378549	0.0963641		Gm16523	Gm16523	Ankmy2
Pcdh8	0.565712	0.000154473	0.0253091		Pcdh8	Pcdh8	Nub1
Syt7	0.563776	0.000388725	0.0393322		Syt7	Syt7	Dnajc7
Sstr1	0.56355	0.00402916	0.0987807		Sstr1	Sstr1	Lig3
Cyp26b1	0.562784	0.00248392	0.0799511		Cyp26b1	Cyp26b1	Prc1
Chrna4	0.56277	0.00384578	0.0965757		Chrna4	Chrna4	Grb10
Nr2f1	0.562572	0.000918635	0.0535458		Nr2f1	Nr2f1	Trub2
Hivep2	0.562138	0.000714977	0.0495602		Hivep2	Hivep2	Casd1
Epha3	0.557819	0.00195228	0.0743027		Epha3	Epha3	Chmp2a
Trp53i11	0.557495	0.00170298	0.0697547		Trp53i11	Trp53i11	Lyst
Ppp1r14c	0.556415	0.00533331	0.112839		Ppp1r14c	Ppp1r14c	Txndc16
1700017B05Rik	0.556371	0.00210394	0.0768339		1700017B05Rik	1700017B05Rik	Eif4a1
Zfp703	0.556012	0.00115932	0.0587854		Zfp703	Zfp703	Dnajc8
Pcsk5	0.555726	0.00312468	0.0876429		Pcsk5	Pcsk5	Egfr
Rasl11b	0.554853	0.00100515	0.0550564		Rasl11b	Rasl11b	Emc3
Nkd2	0.55391	0.00200767	0.0755546		Nkd2	Nkd2	Kars
Adra2c	0.552856	0.00018684	0.0285249		Adra2c	Adra2c	Slc25a5
Trp53inp2	0.550143	1.14641e-05	0.00616081		Trp53inp2	Trp53inp2	Arf5
Rasa4	0.550121	0.00143592	0.066067		Rasa4	Rasa4	Psip1
Sez6	0.548058	0.00602373	0.11733		Sez6	Sez6	Rad23a
Tob2	0.547445	0.00180852	0.0715762		Tob2	Tob2	Fez1
Cacng8	0.546481	3.61912e-06	0.00347306		Cacng8	Cacng8	Ercc3
Adamts17	0.546267	0.00599139	0.11733		Adamts17	Adamts17	Ppil4
Bcl2l12	0.545876	0.00223872	0.0779866		Bcl2l12	Bcl2l12	Hnrnpc
A330102I10Rik	0.545852	0.000273669	0.03212		A330102I10Rik	A330102I10Rik	Golga7
Slc25a42	0.544234	0.00267222	0.0829897		Slc25a42	Slc25a42	Mrpl20
Iglon5	0.543897	0.00168954	0.0696289		Iglon5	Iglon5	Cd2bp2
Sdk1	0.542515	0.00492823	0.10906		Sdk1	Sdk1	Fnbp1l
Hist1h3h	0.542202	0.000798428	0.0517277		Hist1h3h	Hist1h3h	Fbxo25
Nt5dc3	0.54137	0.00171755	0.0699249		Nt5dc3	Nt5dc3	Samm50
Htr2a	0.540288	0.00468613	0.107072		Htr2a	Htr2a	Cct5
Ackr1	0.539732	0.000142275	0.0242823		Ackr1	Ackr1	Morn4
Pde1a	0.539227	0.00530552	0.112784		Pde1a	Pde1a	Cbx1
Fam101b	0.53911	0.000173761	0.0274645		Fam101b	Fam101b	Ccdc23
Hivep1	0.538023	0.00235051	0.0791879		Hivep1	Hivep1	Nono
Sv2b	0.537055	0.00068226	0.0494677		Sv2b	Sv2b	Txnl4a
Vwc2	0.536877	0.00374458	0.0963231		Vwc2	Vwc2	C1d
Grin2d	0.534667	0.00603272	0.11733		Grin2d	Grin2d	Nfyb
BC017158	0.5344	0.000435225	0.0406059		BC017158	BC017158	Scrn1
Grin3a	0.53417	0.00217318	0.0776784		Grin3a	Grin3a	Psma7
Kcnh7	0.534038	0.00440339	0.103245		Kcnh7	Kcnh7	Cdkn2aipnl
Cadps2	0.533791	0.00555352	0.115376		Cadps2	Cadps2	Slc25a11
Lrrn2	0.533689	0.0001425	0.0242823		Lrrn2	Lrrn2	Idh3g
Col23a1	0.533026	0.00323258	0.0895505		Col23a1	Col23a1	Hnrnpm
2610507I01Rik	0.531914	0.00314117	0.0877848		2610507I01Rik	2610507I01Rik	Ndc1
Foxk1	0.530547	0.00365033	0.0949954		Foxk1	Foxk1	Eif3k
Tmem178	0.530517	0.000431456	0.0405572		Tmem178	Tmem178	Eef1b2
BC049635	0.529094	0.00802449	0.132119		BC049635	BC049635	Lrwd1
Pth1r	0.529042	0.00584055	0.116552		Pth1r	Pth1r	Fam107b
Gtf3a	0.528121	0.000516206	0.04281		Gtf3a	Gtf3a	Myg1
2310022B05Rik	0.525154	9.28464e-06	0.00566996		2310022B05Rik	2310022B05Rik	Rtcb
Prkcg	0.524359	0.00460737	0.105812		Prkcg	Prkcg	Msi2
Tec	0.522626	0.00808281	0.132166		Tec	Tec	1700037H04Rik
Kcnq4	0.520687	0.000533482	0.0435726		Kcnq4	Kcnq4	Slc7a6os
Bahd1	0.5199	0.00539114	0.113561		Bahd1	Bahd1	1110004F10Rik
Zfpm1	0.519604	0.0083204	0.133554		Zfpm1	Zfpm1	Birc2
Scube1	0.519298	0.0093064	0.139544		Scube1	Scube1	Tpm4
Samd11	0.519021	0.00458138	0.105576		Samd11	Samd11	Zfp882
Bcar1	0.518993	0.000907876	0.0535458		Bcar1	Bcar1	Xpo1
Synm	0.518682	7.56199e-05	0.0169326		Synm	Synm	Prdx2
Prrc1	0.517337	0.000463978	0.0415569		Prrc1	Prrc1	Setd3
Spag4	0.516603	0.000851076	0.0531824		Spag4	Spag4	Erp29
Trim67	0.516554	0.00200142	0.0755313		Trim67	Trim67	Tex9
Shisa2	0.516497	0.00574642	0.115921		Shisa2	Shisa2	Chchd4
Tcerg1l	0.516373	0.00623931	0.118565		Tcerg1l	Tcerg1l	Tram1l1
Rtn4r	0.516303	0.00795121	0.131566		Rtn4r	Rtn4r	Pcdhb17
Cygb	0.516288	0.00248124	0.0799511		Cygb	Cygb	Pef1
Tpcn1	0.51553	0.00538496	0.113561		Tpcn1	Tpcn1	Hnrnpa2b1
Lrrc75b	0.515026	0.00219014	0.0777501		Lrrc75b	Lrrc75b	Aifm1
E130012A19Rik	0.514733	0.00858377	0.135692		E130012A19Rik	E130012A19Rik	Agpat5
Col1a1	0.514716	0.00931739	0.139553		Col1a1	Col1a1	Pbx2
Kcnt2	0.51431	0.00242759	0.0799511		Kcnt2	Kcnt2	Agk
Cacng2	0.51288	0.00384393	0.0965757		Cacng2	Cacng2	Smc4
Chrna7	0.511898	0.00179648	0.0714072		Chrna7	Chrna7	Sox2
Cdk5r2	0.511835	0.00142141	0.0658221		Cdk5r2	Cdk5r2	Pwp1
Chrm3	0.511397	0.0102808	0.147095		Chrm3	Chrm3	Pdzd11
Lrfn1	0.511234	0.00310438	0.0874367		Lrfn1	Lrfn1	Txlng
Cdh10	0.510124	0.00675071	0.122562		Cdh10	Cdh10	Park7
Mnt	0.509824	0.00509907	0.11032		Mnt	Mnt	Polr2g
Tmem163	0.509493	0.0106888	0.149588		Tmem163	Tmem163	Slc25a38
Sema6c	0.508399	0.00416568	0.0999346		Sema6c	Sema6c	Chmp1a
Kcnc2	0.508283	0.00670959	0.122379		Kcnc2	Kcnc2	Cpsf3
Slc1a6	0.507716	0.00402584	0.0987807		Slc1a6	Slc1a6	Toe1
Hdac4	0.507302	0.000691719	0.0494677		Hdac4	Hdac4	Rpl10a
Ak5	0.507059	0.000197403	0.0294679		Ak5	Ak5	Arpc5
Spock1	0.506965	0.00606952	0.11733		Spock1	Spock1	Fam19a5
Bai1	0.506019	0.00146837	0.0663076		Bai1	Bai1	Prkd3
Map3k5	0.505503	0.000500995	0.0423525		Map3k5	Map3k5	Mrpl24
Sec24d	0.503355	0.00719478	0.125637		Sec24d	Sec24d	Mtmr7
Pdgfc	0.502816	0.0101969	0.14605		Pdgfc	Pdgfc	Nudt2
Shisa6	0.502535	0.00665697	0.122215		Shisa6	Shisa6	Sae1
Iqsec2	0.502201	0.00171145	0.0698886		Iqsec2	Iqsec2	Pramef8
Nr4a2	0.499519	0.00249022	0.0799511		Nr4a2	Nr4a2	Sdr39u1
Klf6	0.49882	0.00247835	0.0799511		Klf6	Klf6	Cops4
Otx1	0.49718	0.0126141	0.160029		Otx1	Otx1	Zeb1
Myo16	0.496472	0.00332491	0.0911635		Myo16	Myo16	Slx4ip
Klhl21	0.496013	0.00610966	0.117668		Klhl21	Klhl21	Fbxo18
Pklr	0.495333	0.0106199	0.149158		Pklr	Pklr	Nup107
Abcc10	0.493833	0.00799481	0.131954		Abcc10	Abcc10	Ndufc1
Arhgap23	0.493441	0.00306379	0.0874367		Arhgap23	Arhgap23	Atp5k
Cfp	0.493182	0.00211601	0.0768339		Cfp	Cfp	Tmem208
Crlf1	0.49318	0.00110724	0.0576643		Crlf1	Crlf1	Hax1
Zbtb46	0.493073	0.00478905	0.107774		Zbtb46	Zbtb46	Sumo3
Ptchd2	0.492993	0.000676538	0.0494677		Ptchd2	Ptchd2	Mrrf
A630089N07Rik	0.492598	0.00647011	0.120718		A630089N07Rik	A630089N07Rik	Paip2
Btbd3	0.492066	0.00444801	0.103559		Btbd3	Btbd3	Jrk
Mlip	0.49172	0.0137853	0.165806		Mlip	Mlip	Ppp4c
Rab11fip5	0.491307	0.00276602	0.0835195		Rab11fip5	Rab11fip5	Guk1
Abhd17c	0.491122	0.00309324	0.0874367		Abhd17c	Abhd17c	Rbbp7
Rhou	0.49109	0.00699714	0.124065		Rhou	Rhou	Msto1
Kcnh3	0.490161	0.00381312	0.0963641		Kcnh3	Kcnh3	Rab30
Zcchc16	0.489713	0.0107798	0.15008		Zcchc16	Zcchc16	Sumo2
Prex1	0.488644	0.000217803	0.0301668		Prex1	Prex1	Pak1ip1
Stac3	0.488596	0.0104969	0.148497		Stac3	Stac3	Bzw2
Slc7a3	0.488592	0.00415652	0.0998978		Slc7a3	Slc7a3	Nelfcd
Nfatc2	0.488253	0.0127775	0.160585		Nfatc2	Nfatc2	Hip1r
Rfng	0.487458	0.0025673	0.0815406		Rfng	Rfng	Cnot7
Pcdh1	0.487374	0.00948139	0.140449		Pcdh1	Pcdh1	Hnrnph1
Gmip	0.486639	0.0029076	0.0858542		Gmip	Gmip	Fam214a
Emx2os	0.484057	0.00980395	0.142938		Emx2os	Emx2os	Pkm
Pik3r1	0.483997	0.000651821	0.0491978		Pik3r1	Pik3r1	Fam136a
4930480K15Rik	0.483773	0.0147539	0.169998		4930480K15Rik	4930480K15Rik	Cdk4
1810041L15Rik	0.483719	0.00688719	0.123208		1810041L15Rik	1810041L15Rik	Slc35b2
Igfbp5	0.48321	0.00958092	0.140985		Igfbp5	Igfbp5	Rnf13
Dlc1	0.482963	0.00384246	0.0965757		Dlc1	Dlc1	Map1lc3b
Micall1	0.482071	0.000129094	0.0242823		Micall1	Micall1	Zfp943
Hdac9	0.481771	0.00783637	0.130722		Hdac9	Hdac9	Sp4
Rimbp2	0.481741	8.09868e-05	0.0175493		Rimbp2	Rimbp2	Ankrd45
Six5	0.481082	0.00247081	0.0799511		Six5	Six5	Raly
Triobp	0.480602	0.011604	0.154346		Triobp	Triobp	Tssc1
Wnt7b	0.480391	0.0147189	0.169956		Wnt7b	Wnt7b	Nsmce1
Slc9a3r2	0.480334	0.000770958	0.0508836		Slc9a3r2	Slc9a3r2	Cnbp
Smad9	0.480329	0.0156885	0.173697		Smad9	Smad9	Hook1
Gpr68	0.480223	0.0161859	0.176959		Gpr68	Gpr68	Rwdd1
Fat4	0.480173	0.0157272	0.173804		Fat4	Fat4	Psmd4
C1ql1	0.479728	0.00488807	0.108547		C1ql1	C1ql1	Lcmt1
Speg	0.479458	0.000902681	0.0535458		Speg	Speg	Mrpl19
Celsr1	0.479348	0.00381583	0.0963641		Celsr1	Celsr1	Psma6
Thbs2	0.479274	0.0112936	0.152799		Thbs2	Thbs2	Rpl15
Trpv6	0.47806	0.0137189	0.165452		Trpv6	Trpv6	Ddit4
Scrt2	0.478034	0.00232016	0.0789148		Scrt2	Scrt2	2210013O21Rik
Capn1	0.477913	0.00161497	0.0682301		Capn1	Capn1	Ska2
Trak1	0.477453	0.00174375	0.0701414		Trak1	Trak1	Ndufa5
D030047H15Rik	0.477388	0.000753791	0.0508836		D030047H15Rik	D030047H15Rik	Bmi1
Sh3gl2	0.475963	0.00806078	0.132166		Sh3gl2	Sh3gl2	Pdcd4
Mast1	0.47572	0.00697712	0.124065		Mast1	Mast1	Rpap3
Ppfia3	0.47533	0.00439621	0.103245		Ppfia3	Ppfia3	Mrps18c
Gse1	0.474608	0.00919717	0.139305		Gse1	Gse1	H2afy
Eml1	0.474352	0.0030851	0.0874367		Eml1	Eml1	Snrnp40
Syt13	0.474018	0.00436764	0.102946		Syt13	Syt13	Spcs2
Car10	0.473957	0.0138617	0.166374		Car10	Car10	Atp11c
Lrrtm1	0.473509	0.00372587	0.0962161		Lrrtm1	Lrrtm1	Lsm14a
Klf13	0.473273	0.00341758	0.0922068		Klf13	Klf13	1110038F14Rik
Cntnap4	0.471828	0.00754529	0.128378		Cntnap4	Cntnap4	Ndufs4
Fgd1	0.471639	0.0110035	0.151829		Fgd1	Fgd1	Vta1
Glis2	0.471435	0.00805816	0.132166		Glis2	Glis2	Wibg
Snx7	0.47127	0.00923365	0.13937		Snx7	Snx7	Lta4h
Shank2	0.470632	0.0066918	0.122379		Shank2	Shank2	Rnf32
A830018L16Rik	0.470502	0.000350187	0.0377957		A830018L16Rik	A830018L16Rik	Wsb1
Zfp385a	0.469994	0.00480955	0.107893		Zfp385a	Zfp385a	Atp5c1
Serpinf1	0.469843	0.0156806	0.173697		Serpinf1	Serpinf1	Atpif1
Kif21b	0.469806	0.00672243	0.122379		Kif21b	Kif21b	Rpl21
Cnksr2	0.46959	0.00144825	0.0663076		Cnksr2	Cnksr2	Rbm3
Ttyh3	0.469242	0.00185137	0.0723058		Ttyh3	Ttyh3	Eif2a
Cib2	0.468791	0.0094852	0.140449		Cib2	Cib2	Blcap
Lingo1	0.468645	0.0022791	0.0781411		Lingo1	Lingo1	Srl
Cacng5	0.468615	0.0054552	0.113982		Cacng5	Cacng5	Kif11
Ell2	0.46847	0.00240752	0.0799511		Ell2	Ell2	2410015M20Rik
Coro7	0.468286	0.000454628	0.0414167		Coro7	Coro7	Gpx4
Has2	0.468067	0.00944886	0.140449		Has2	Has2	Atp5j
Ppp3cc	0.467916	0.000703263	0.0494677		Ppp3cc	Ppp3cc	Crebrf
Nptx1	0.467357	0.0166499	0.179096		Nptx1	Nptx1	Phpt1
Jph1	0.467121	0.00150656	0.0663076		Jph1	Jph1	Ssr4
Cxxc5	0.467079	0.00352641	0.0937608		Cxxc5	Cxxc5	Tmem129
H1fx	0.467012	0.00992756	0.143725		H1fx	H1fx	Tomm22
Hic1	0.466844	0.0125062	0.159262		Hic1	Hic1	Umps
Vsig10l	0.466696	0.00872019	0.136025		Vsig10l	Vsig10l	Fam204a
Tle3	0.465975	0.00612802	0.117782		Tle3	Tle3	Chd3os
Chst12	0.465741	0.00742498	0.127218		Chst12	Chst12	Ndufa7
LOC101056043	0.465628	0.0196913	0.193811		LOC101056043	LOC101056043	Yeats4
Irs1	0.465395	0.000297248	0.0332794		Irs1	Irs1	Rrm2
Ildr2	0.465287	0.00111657	0.0576968		Ildr2	Ildr2	Bex4
Cacna1i	0.464814	0.0199341	0.194792		Cacna1i	Cacna1i	Hmces
Nuak1	0.464327	0.00859348	0.135692		Nuak1	Nuak1	Cdc123
Ncald	0.464312	0.0103326	0.147529		Ncald	Ncald	Psmb6
Tnxb	0.46394	0.0148993	0.170694		Tnxb	Tnxb	Sod1
Mgat4b	0.463672	0.008588	0.135692		Mgat4b	Mgat4b	Atp5h
Prkg1	0.463634	0.0106275	0.149158		Prkg1	Prkg1	Mrps17
Tmc4	0.463574	0.0163543	0.178055		Tmc4	Tmc4	Rnf180
Trhde	0.463311	0.00571531	0.115696		Trhde	Trhde	Myeov2
Jazf1	0.463273	0.000812397	0.0517277		Jazf1	Jazf1	2610524H06Rik
Osbpl10	0.463047	0.00225541	0.0780005		Osbpl10	Osbpl10	Xpo7
Trim16	0.462966	0.0203964	0.196294		Trim16	Trim16	Ptma
Fzd9	0.462699	0.013225	0.162406		Fzd9	Fzd9	Eif4a3
Gca	0.462274	0.00879756	0.136484		Gca	Gca	Serf2
Lmtk2	0.462234	0.000142784	0.0242823		Lmtk2	Lmtk2	Phb
Zdhhc22	0.462182	0.0203717	0.196253		Zdhhc22	Zdhhc22	Ndufb8
Adamts8	0.462172	0.00631489	0.118991		Adamts8	Adamts8	Fam96b
Smoc2	0.461128	0.0209203	0.198955		Smoc2	Smoc2	Cox6c
BC018242	0.460663	0.00794609	0.131566		BC018242	BC018242	Hmbs
Pdgfa	0.460248	0.00151148	0.0663076		Pdgfa	Pdgfa	Zfp273
Pitpnm2	0.460084	0.00681478	0.122566		Pitpnm2	Pitpnm2	Commd9
Trpc3	0.459671	0.0076246	0.129147		Trpc3	Trpc3	Hist1h1e
Tmem145	0.458909	0.00819537	0.132816		Tmem145	Tmem145	Cetn3
Sstr3	0.458746	0.018834	0.190134		Sstr3	Sstr3	Mdk
Ocel1	0.458329	0.0144198	0.169106		Ocel1	Ocel1	Vldlr
Alpk1	0.458227	0.0217181	0.20179		Alpk1	Alpk1	Gbas
A830082K12Rik	0.458054	0.0128895	0.161002		A830082K12Rik	A830082K12Rik	Rpp25l
Sh2b3	0.457917	0.000642327	0.0487551		Sh2b3	Sh2b3	Tm2d2
Rbfox3	0.457825	0.00294374	0.0865408		Rbfox3	Rbfox3	Smpdl3a
Csrnp1	0.457644	0.0215268	0.201682		Csrnp1	Csrnp1	Ttc4
Zeb2	0.457477	0.0217794	0.20205		Zeb2	Zeb2	Nup93
Cecr6	0.457353	0.000118321	0.0237259		Cecr6	Cecr6	Eif2s2
Cav2	0.456757	0.0080796	0.132166		Cav2	Cav2	Them4
Pdzrn4	0.456462	0.00450444	0.10434		Pdzrn4	Pdzrn4	Rps26
Stat2	0.455833	0.00560674	0.115525		Stat2	Stat2	Eif4b
Akap13	0.455331	0.0015319	0.0666056		Akap13	Akap13	Bex2
Sphkap	0.455224	0.00940164	0.14019		Sphkap	Sphkap	Syne2
Tgfb1i1	0.455096	0.00552832	0.115152		Tgfb1i1	Tgfb1i1	Ddx6
Necab3	0.454626	0.00600375	0.11733		Necab3	Necab3	Mbd3
Tnr	0.454419	0.00924294	0.13937		Tnr	Tnr	Atp5j2
Htr1a	0.454081	0.0201656	0.195217		Htr1a	Htr1a	Cfdp1
Lrp5	0.45388	0.0117593	0.154888		Lrp5	Lrp5	Igsf3
Dock3	0.453699	0.00205671	0.0765368		Dock3	Dock3	Ing4
Eif4g3	0.453192	0.0118798	0.155409		Eif4g3	Eif4g3	Mettl21a
Dnah17	0.453119	0.0223396	0.204284		Dnah17	Dnah17	Ndufb5
Cspg4	0.453098	0.000910349	0.0535458		Cspg4	Cspg4	Pknox1
Tmem196	0.452794	0.0203733	0.196253		Tmem196	Tmem196	Orc5
Mmp9	0.452137	0.00392307	0.0972443		Mmp9	Mmp9	Pfdn5
Zyx	0.451585	0.0104988	0.148497		Zyx	Zyx	Pvrl3
Celsr2	0.451493	0.0131979	0.162375		Celsr2	Celsr2	Dctn3
Slc7a5	0.4514	0.00106752	0.0566885		Slc7a5	Slc7a5	Mrps16
Shank1	0.451212	0.0165194	0.178407		Shank1	Shank1	Btf3l4
Tmem74	0.449189	0.0183698	0.187252		Tmem74	Tmem74	Tmpo
Slc6a7	0.44894	0.0142055	0.168122		Slc6a7	Slc6a7	Arglu1
Fam49a	0.448871	0.00418055	0.099939		Fam49a	Fam49a	Ppp1ca
Cabp1	0.448551	0.0081812	0.132816		Cabp1	Cabp1	B230118H07Rik
Ptpn3	0.448498	0.0213356	0.200665		Ptpn3	Ptpn3	Npc2
2900097C17Rik	0.44832	0.000385104	0.0393322		2900097C17Rik	2900097C17Rik	Cenpe
Me1	0.448199	0.00338724	0.0921205		Me1	Me1	Wbp5
Abca3	0.447841	0.000352452	0.0377957		Abca3	Abca3	Gtf2f1
8430427H17Rik	0.44695	0.00670567	0.122379		8430427H17Rik	8430427H17Rik	Zfp330
Gpd2	0.446596	0.00362686	0.0949954		Gpd2	Gpd2	Aldh1l1
Foxg1	0.446435	0.0132107	0.162384		Foxg1	Foxg1	Mrpl2
Klhl4	0.446268	0.0176659	0.184271		Klhl4	Klhl4	Rpl12
Slc41a3	0.446262	0.0130005	0.16175		Slc41a3	Slc41a3	Fpgs
Sipa1l3	0.445669	0.0213771	0.20084		Sipa1l3	Sipa1l3	Denr
Nxph2	0.445238	0.0252446	0.214195		Nxph2	Nxph2	Impdh2
Matn2	0.445094	0.00224643	0.0779866		Matn2	Matn2	C330027C09Rik
Map1b	0.44508	0.000422864	0.0405572		Map1b	Map1b	Thumpd1
Arhgef28	0.444317	0.00509929	0.11032		Arhgef28	Arhgef28	Pde2a
Slc8a2	0.443568	0.000898611	0.0535458		Slc8a2	Slc8a2	Utrn
Ncan	0.443429	0.00208899	0.0768339		Ncan	Ncan	Enho
Prdm11	0.443304	0.0221416	0.20339		Prdm11	Prdm11	Dctpp1
Nell1	0.442572	0.0186396	0.188713		Nell1	Nell1	Dnajc19
Snph	0.442081	0.00420641	0.100378		Snph	Snph	Crk
Igf2bp1	0.441855	0.00703898	0.124422		Igf2bp1	Igf2bp1	Adarb2
Gramd1b	0.441607	0.0018678	0.0725255		Gramd1b	Gramd1b	Mxi1
Rmi2	0.441466	0.026752	0.218857		Rmi2	Rmi2	Arhgap42
Slc22a15	0.441281	0.000940717	0.0536771		Slc22a15	Slc22a15	Arxes2
Pcdhga12	0.441113	0.000764467	0.0508836		Pcdhga12	Pcdhga12	Rraga
Car12	0.440574	0.0270168	0.219351		Car12	Car12	Hat1
Mamld1	0.440449	0.00796341	0.131597		Mamld1	Mamld1	H3f3a
Ecm1	0.440397	0.0274255	0.219711		Ecm1	Ecm1	Tmem231
Mrgpre	0.440207	0.0232881	0.208723		Mrgpre	Mrgpre	Dtnbp1
Fam19a1	0.440016	0.0145104	0.16952		Fam19a1	Fam19a1	Cirbp
Nfic	0.439292	0.0244572	0.212816		Nfic	Nfic	BC052040
Sema4d	0.438473	0.000903076	0.0535458		Sema4d	Sema4d	Pfdn1
Slc25a22	0.438458	0.00699974	0.124065		Slc25a22	Slc25a22	Zfp955a
Cacna2d1	0.438149	0.0281372	0.221584		Cacna2d1	Cacna2d1	Kin
Snap91	0.437982	4.80843e-05	0.0142902		Snap91	Snap91	Glce
Clip3	0.437876	0.0149158	0.170694		Clip3	Clip3	Med11
Slc45a4	0.437796	0.00304131	0.0872092		Slc45a4	Slc45a4	Pdk1
Extl1	0.437685	0.0248715	0.213144		Extl1	Extl1	Lrrc49
Stambpl1	0.437654	0.00445531	0.103559		Stambpl1	Stambpl1	Mrps18a
Smtnl2	0.437293	0.00603706	0.11733		Smtnl2	Smtnl2	Stk4
D2hgdh	0.437286	0.00267013	0.0829897		D2hgdh	D2hgdh	Hspe1
Elfn1	0.436898	0.0179418	0.184858		Elfn1	Elfn1	Hist3h2a
Osbpl6	0.436672	0.00300931	0.0871337		Osbpl6	Osbpl6	Rplp2
Tmem108	0.436119	0.024342	0.212816		Tmem108	Tmem108	Mphosph6
Dclre1c	0.435781	0.000682217	0.0494677		Dclre1c	Dclre1c	Bckdha
Mtcl1	0.435323	0.00542656	0.113561		Mtcl1	Mtcl1	Fundc2
Ttc28	0.43474	0.0293279	0.224002		Ttc28	Ttc28	Larp7
Dact1	0.434275	0.00210105	0.0768339		Dact1	Dact1	Pop7
B130006D01Rik	0.434079	0.0245373	0.212816		B130006D01Rik	B130006D01Rik	Fastk
Nxph1	0.433657	0.00176539	0.0705892		Nxph1	Nxph1	Nusap1
Rnf10	0.433492	0.00827611	0.133481		Rnf10	Rnf10	Fut11
Cacna1a	0.433264	0.00784232	0.130722		Cacna1a	Cacna1a	AW209491
Gpr82	0.433207	0.0182224	0.186173		Gpr82	Gpr82	Nrsn1
Ttbk1	0.433158	0.0198908	0.194722		Ttbk1	Ttbk1	Rpl18
Npy1r	0.433019	0.00500535	0.109473		Npy1r	Npy1r	Prelid1
Vars	0.432658	0.00471427	0.107097		Vars	Vars	Cdc20
Plec	0.432439	0.00871761	0.136025		Plec	Plec	1110004E09Rik
Lipe	0.432368	0.00448973	0.104179		Lipe	Lipe	Ddx26b
Osmr	0.432348	0.0155556	0.173533		Osmr	Osmr	U2af1
Atg2a	0.432271	0.0092557	0.139401		Atg2a	Atg2a	Exosc7
Il1rapl2	0.432004	0.0274083	0.219711		Il1rapl2	Il1rapl2	Ndufa13
Dnajc6	0.431686	7.84178e-05	0.0172712		Dnajc6	Dnajc6	Asrgl1
Synpo	0.431146	0.0118186	0.155343		Synpo	Synpo	Gas2l3
Ephx4	0.430694	0.0290686	0.223803		Ephx4	Ephx4	Ngfrap1
Tjap1	0.430467	0.00347092	0.0927075		Tjap1	Tjap1	Ankrd6
Pgm2l1	0.430275	0.00125497	0.0611891		Pgm2l1	Pgm2l1	Kctd18
Zfp69	0.429817	0.0183227	0.186914		Zfp69	Zfp69	Lsm5
Osbpl1a	0.429649	0.0192581	0.192224		Osbpl1a	Osbpl1a	Eef2
B3galt2	0.429517	0.0101515	0.14563		B3galt2	B3galt2	Atp6v1f
Rai2	0.429497	0.012416	0.158715		Rai2	Rai2	Rpl22
Osbpl5	0.429195	0.00630716	0.118991		Osbpl5	Osbpl5	Acadm
Smco3	0.428949	0.0274414	0.219711		Smco3	Smco3	Tma7
Mctp1	0.428889	0.00983068	0.142938		Mctp1	Mctp1	Nova1
Mta1	0.428866	0.0221239	0.20339		Mta1	Mta1	1500009L16Rik
Gpr123	0.428866	0.0154596	0.173097		Gpr123	Gpr123	Clpp
Zfp771	0.428532	0.00390669	0.0971853		Zfp771	Zfp771	Cnpy2
Lmo7	0.428466	0.00274756	0.0834534		Lmo7	Lmo7	Rpl38
Lrp1	0.428217	0.0136976	0.165452		Lrp1	Lrp1	Rbmx
Fbxl7	0.428161	0.0113838	0.153414		Fbxl7	Fbxl7	Mcm5
Ephb6	0.426564	0.0105723	0.148888		Ephb6	Ephb6	Entpd1
Lrfn2	0.426352	0.0032794	0.0904422		Lrfn2	Lrfn2	Zfp618
E230016M11Rik	0.426178	0.0297266	0.225509		E230016M11Rik	E230016M11Rik	Glrx5
Cyfip2	0.426159	0.000239143	0.0308932		Cyfip2	Cyfip2	AF357359
Per2	0.426125	0.0217073	0.20179		Per2	Per2	Nme3
Tmem131	0.425363	0.00599849	0.11733		Tmem131	Tmem131	Firre
Ptprn	0.425222	0.00569208	0.11568		Ptprn	Ptprn	Rpa2
Sstr2	0.425168	0.0243507	0.212816		Sstr2	Sstr2	Mis18a
Sugp1	0.425076	0.00155097	0.067217		Sugp1	Sugp1	Maf1
Ctgf	0.42506	0.0324566	0.232517		Ctgf	Ctgf	Rpl41
Proser1	0.424529	0.00380664	0.0963641		Proser1	Proser1	Bola1
Camk1	0.424484	0.00872885	0.136025		Camk1	Camk1	D8Ertd738e
Sigmar1	0.424434	0.0056513	0.11568		Sigmar1	Sigmar1	Hist1h1a
Sdk2	0.424405	0.0264113	0.218361		Sdk2	Sdk2	Npm1
Atf7	0.424371	0.00605431	0.11733		Atf7	Atf7	Mrpl46
Pcnx	0.424218	0.000278138	0.03212		Pcnx	Pcnx	Rps17
Ltbp3	0.424205	0.00946955	0.140449		Ltbp3	Ltbp3	Rpl27a
Ptpro	0.424077	0.00412802	0.099569		Ptpro	Ptpro	Cdc14a
6330403A02Rik	0.42375	0.031527	0.230552		6330403A02Rik	6330403A02Rik	Tmem258
Grm2	0.423629	0.0197634	0.194094		Grm2	Grm2	Usmg5
Slc8a1	0.423626	0.00836483	0.133592		Slc8a1	Slc8a1	Atp5g2
Cys1	0.423447	0.0298047	0.22553		Cys1	Cys1	Tbca
Slc29a4	0.423268	0.00763249	0.129147		Slc29a4	Slc29a4	Ruvbl2
Zfp54	0.423156	0.0280758	0.22149		Zfp54	Zfp54	Rps24
Tle2	0.423034	0.0274192	0.219711		Tle2	Tle2	Fam184a
Tgfb2	0.422762	0.0116289	0.154346		Tgfb2	Tgfb2	Rpl36al
Psmb10	0.422639	0.00766714	0.12957		Psmb10	Psmb10	Zfp212
Col19a1	0.422522	0.0243565	0.212816		Col19a1	Col19a1	Ndufaf3
Rarg	0.422427	0.00742891	0.127218		Rarg	Rarg	Apoa1bp
Kcnip4	0.422072	0.0175188	0.184038		Kcnip4	Kcnip4	Bloc1s5
Camk2n2	0.421739	0.00869114	0.136025		Camk2n2	Camk2n2	Fra10ac1
Vwc2l	0.421669	0.0185632	0.188366		Vwc2l	Vwc2l	Atp5g1
Hist1h2ag	0.420827	0.00630271	0.118991		Hist1h2ag	Hist1h2ag	Zfp709
Mypop	0.420804	0.0123405	0.158239		Mypop	Mypop	Ogfr
Adamts2	0.420594	0.0336541	0.236106		Adamts2	Adamts2	Btg1
Ccdc109b	0.420507	0.0277084	0.22049		Ccdc109b	Ccdc109b	Bex1
Cep170b	0.420323	0.01965	0.193786		Cep170b	Cep170b	Pdcd2
Cnrip1	0.419648	0.00287707	0.0853277		Cnrip1	Cnrip1	Hist3h2ba
Kcng1	0.419449	0.0269223	0.21908		Kcng1	Kcng1	Polr1c
Vstm2b	0.418825	0.0131066	0.162336		Vstm2b	Vstm2b	Trnt1
Cnnm2	0.418543	0.00102549	0.0553314		Cnnm2	Cnnm2	Tmem66
Lphn1	0.418508	0.0146696	0.169888		Lphn1	Lphn1	2810021J22Rik
Shroom3	0.418492	0.0355224	0.240789		Shroom3	Shroom3	Uqcr11
Zfp52	0.418403	0.0214304	0.2012		Zfp52	Zfp52	Tmem242
St3gal1	0.418329	0.0312489	0.229415		St3gal1	St3gal1	Ndufa8
Gas2l1	0.418242	0.00597789	0.11733		Gas2l1	Gas2l1	Nifk
Clmn	0.418187	0.0240067	0.212191		Clmn	Clmn	Mak16
Nrp2	0.417812	0.00557159	0.115376		Nrp2	Nrp2	Naa10
Ret	0.417743	0.0327628	0.232572		Ret	Ret	Hsd17b10
Col9a1	0.417559	0.0348401	0.238939		Col9a1	Col9a1	Insig2
Capn15	0.417412	0.0150467	0.17117		Capn15	Capn15	Naga
Larp1	0.416972	0.0140448	0.167377		Larp1	Larp1	Rps4x
Hivep3	0.4168	0.0333739	0.234753		Hivep3	Hivep3	Pole3
Kcnc1	0.416773	0.0218788	0.202578		Kcnc1	Kcnc1	Rps25
Atp1b2	0.416642	0.00376407	0.0963244		Atp1b2	Atp1b2	Rnf113a2
Lrrc8c	0.41638	0.00611237	0.117668		Lrrc8c	Lrrc8c	Rps2
Dhcr24	0.41605	0.000804947	0.0517277		Dhcr24	Dhcr24	Chsy3
Zfp963	0.41593	0.0015788	0.0679428		Zfp963	Zfp963	Wdr55
Lhx6	0.415544	0.00189472	0.0733588		Lhx6	Lhx6	Plcl2
Plxna1	0.415402	0.00570003	0.11568		Plxna1	Plxna1	Mis18bp1
Hist2h2ab	0.415265	0.00103601	0.0556753		Hist2h2ab	Hist2h2ab	Racgap1
Rorb	0.414825	0.0291121	0.223803		Rorb	Rorb	Atp5sl
Creg2	0.414477	0.0320611	0.231581		Creg2	Creg2	Clu
Lmo1	0.414229	0.0338454	0.236716		Lmo1	Lmo1	Tomm7
Thsd4	0.4139	0.0156155	0.173697		Thsd4	Thsd4	Chchd3
Tmem8b	0.4135	0.00462325	0.105815		Tmem8b	Tmem8b	Ppip5k2
Kcnc3	0.413498	0.0257753	0.2154		Kcnc3	Kcnc3	Syf2
Dennd4b	0.41318	0.0110204	0.151829		Dennd4b	Dennd4b	Xpa
Synj2	0.412664	0.00582837	0.116552		Synj2	Synj2	Supt4a
Slc22a8	0.412304	0.00981548	0.142938		Slc22a8	Slc22a8	Rpl27
Abca7	0.41203	0.00297733	0.0868349		Abca7	Abca7	Ddx28
Trpv2	0.411794	0.00808899	0.132166		Trpv2	Trpv2	Mgst3
Kcnv1	0.411778	0.0248513	0.213144		Kcnv1	Kcnv1	Hypk
Tnc	0.411575	0.00532565	0.112839		Tnc	Tnc	Rpl19
Btbd11	0.411484	0.0315926	0.230552		Btbd11	Btbd11	Hace1
Pom121	0.411417	0.0216795	0.20179		Pom121	Pom121	Igbp1
Pigb	0.411306	0.0164349	0.178176		Pigb	Pigb	Steap2
Plcd1	0.410461	0.0263432	0.218255		Plcd1	Plcd1	Cox4i1
Ssh1	0.410311	0.00320526	0.0891567		Ssh1	Ssh1	Inpp5f
Prss12	0.410007	0.0233486	0.209125		Prss12	Prss12	Rplp1
Hif3a	0.409897	0.0150199	0.17117		Hif3a	Hif3a	Nagk
Sfrp2	0.409309	0.0146384	0.169888		Sfrp2	Sfrp2	Dhx40
Vasn	0.409265	0.0208662	0.198821		Vasn	Vasn	Fancb
Bbc3	0.409172	0.00840329	0.133924		Bbc3	Bbc3	Rps19
Cryab	0.40915	0.040221	0.251597		Cryab	Cryab	Rpl36
Prrc2b	0.40779	0.0282866	0.221851		Prrc2b	Prrc2b	Gorab
AA415398	0.407404	0.00540568	0.113561		AA415398	AA415398	Lamtor3
Tubb4a	0.407028	0.00487097	0.108527		Tubb4a	Tubb4a	Rpl23a
S1pr5	0.406921	0.0325198	0.232519		S1pr5	S1pr5	Dlgap5
BC021891	0.406629	0.0316963	0.231058		BC021891	BC021891	Cyp2j6
Ralyl	0.405913	0.0100067	0.144404		Ralyl	Ralyl	H2afz
Dyrk2	0.405738	0.00403967	0.0987823		Dyrk2	Dyrk2	Slc7a2
Inhbb	0.40524	0.0255108	0.214798		Inhbb	Inhbb	Rpl17
Pcdhgb5	0.404816	0.0109786	0.151829		Pcdhgb5	Pcdhgb5	Ccdc39
Pou3f1	0.404776	0.00255512	0.081346		Pou3f1	Pou3f1	Mrpl40
Gm996	0.404406	0.0307324	0.228391		Gm996	Gm996	Ect2
4833424O15Rik	0.40422	0.000228838	0.0308932		4833424O15Rik	4833424O15Rik	Fam64a
Tmem200c	0.404167	0.0429489	0.258882		Tmem200c	Tmem200c	Ttc30a1
Syn2	0.402135	0.0088157	0.136578		Syn2	Syn2	Rpl4
Hipk2	0.401916	0.0272885	0.219711		Hipk2	Hipk2	Polr2j
9030025P20Rik	0.401512	0.0443488	0.261213		9030025P20Rik	9030025P20Rik	Rapgef6
Sepn1	0.401428	0.0171066	0.18197		Sepn1	Sepn1	Siva1
Slc36a1	0.401344	0.0142681	0.168173		Slc36a1	Slc36a1	Anapc15
Zdhhc8	0.401333	0.0193392	0.192746		Zdhhc8	Zdhhc8	Rpl8
Trnp1	0.401204	0.00054486	0.0435726		Trnp1	Trnp1	Polr2h
Abcc8	0.4011	0.00681066	0.122566		Abcc8	Abcc8	Mrpl22
Garem	0.400918	0.00100547	0.0550564		Garem	Garem	2810008D09Rik
Ttc7	0.400761	0.033867	0.236716		Ttc7	Ttc7	Tmem123
Stxbp1	0.400509	0.0111665	0.152674		Stxbp1	Stxbp1	Enpp5
B4galnt1	0.400461	0.000810315	0.0517277		B4galnt1	B4galnt1	Rpl10
4921511I17Rik	0.400346	0.0448299	0.262034		4921511I17Rik	4921511I17Rik	Rps6ka6
Ccrn4l	0.400172	0.00819212	0.132816		Ccrn4l	Ccrn4l	Pxmp4
Ifngr2	0.400073	0.00272266	0.0834534		Ifngr2	Ifngr2	Rps21
Myrip	0.399995	0.0126885	0.160065		Myrip	Myrip	Naca
Sgk1	0.399908	0.00833934	0.133592		Sgk1	Sgk1	Srsf5
Ksr2	0.399406	0.0267924	0.218857		Ksr2	Ksr2	Eef1a1
Loxl1	0.399223	0.0217451	0.201897		Loxl1	Loxl1	Nsa2
Git1	0.399054	0.0212936	0.200562		Git1	Git1	Rpl32
Nkd1	0.398885	0.0112585	0.152674		Nkd1	Nkd1	Syt5
Wasf3	0.398643	0.000270045	0.0321067		Wasf3	Wasf3	1810032O08Rik
Grhl1	0.39848	0.0435689	0.259882		Grhl1	Grhl1	Thbs3
4932413F04Rik	0.398276	0.0403218	0.251597		4932413F04Rik	4932413F04Rik	Rpgrip1l
Sema4f	0.397872	0.00129267	0.0622472		Sema4f	Sema4f	Hist1h1b
Fhl2	0.397291	0.0250171	0.21328		Fhl2	Fhl2	Polr2e
Ppfia4	0.397188	0.0181573	0.185791		Ppfia4	Ppfia4	Cdc26
Npas2	0.396972	0.0271427	0.21956		Npas2	Npas2	Zfyve19
Aff2	0.396958	0.0319593	0.231432		Aff2	Aff2	Rnaseh2b
Klhl34	0.396837	0.0247616	0.21299		Klhl34	Klhl34	Rpl7a
Mark4	0.396835	0.0461645	0.265165		Mark4	Mark4	Polr2f
Iffo2	0.396783	0.00478065	0.107765		Iffo2	Iffo2	Map2k1
Kdm2b	0.396274	0.0119032	0.155564		Kdm2b	Kdm2b	Ndufb10
2700054A10Rik	0.396241	0.0180498	0.185255		2700054A10Rik	2700054A10Rik	Rpsa
Cyth3	0.396077	0.0140746	0.167377		Cyth3	Cyth3	Plek
Csk	0.395907	0.00756626	0.128512		Csk	Csk	Rpl11
Fam174b	0.395646	0.0282725	0.221851		Fam174b	Fam174b	Lsm7
Tcte2	0.395562	0.0399944	0.251399		Tcte2	Tcte2	Eif3h
Plin4	0.395547	0.0361766	0.242264		Plin4	Plin4	Nans
Lats2	0.395021	0.0124383	0.158848		Lats2	Lats2	Mzt1
Nav1	0.394953	0.0221866	0.203444		Nav1	Nav1	1700021F05Rik
Vav2	0.39461	0.00514652	0.111163		Vav2	Vav2	Rora
Ccdc159	0.394273	0.0380282	0.247055		Ccdc159	Ccdc159	Sec61g
Vash1	0.394076	0.0056176	0.115525		Vash1	Vash1	Top2a
Baiap2l1	0.394063	0.0482307	0.270393		Baiap2l1	Baiap2l1	Tmsb10
Doc2a	0.393972	0.0192864	0.192363		Doc2a	Doc2a	Rpl6
Ankrd13b	0.393953	0.00687122	0.123086		Ankrd13b	Ankrd13b	Med10
Prss35	0.393657	0.0390476	0.249514		Prss35	Prss35	Rpl18a
Rabgap1l	0.393529	0.00428948	0.101713		Rabgap1l	Rabgap1l	Hist1h2bf
Hspa1l	0.393446	0.0028624	0.0852692		Hspa1l	Hspa1l	Slc44a5
4930578M01Rik	0.393359	0.0454359	0.26323		4930578M01Rik	4930578M01Rik	Rps5
Faim2	0.393347	0.0175476	0.184073		Faim2	Faim2	Cep63
Phf13	0.39282	0.0254726	0.214695		Phf13	Phf13	Cntnap2
Mapk7	0.391919	0.0137828	0.165806		Mapk7	Mapk7	Snrpg
Sulf1	0.391548	0.0480578	0.270284		Sulf1	Sulf1	Sft2d2
Klhl25	0.391305	0.0181037	0.1854		Klhl25	Klhl25	Bloc1s2
Map6d1	0.391037	0.0149718	0.17117		Map6d1	Map6d1	Megf10
Ap2a1	0.390874	0.0128118	0.160715		Ap2a1	Ap2a1	Ccnd2
Chrna5	0.390836	0.0495681	0.272943		Chrna5	Chrna5	Mrpl27
Rab3d	0.390676	0.000420244	0.0405572		Rab3d	Rab3d	Ric8b
Notch1	0.390657	0.0289872	0.223803		Notch1	Notch1	Snhg5
Fam129c	0.390635	0.0131927	0.162375		Fam129c	Fam129c	Trappc5
Asic2	0.390605	0.00496798	0.109239		Asic2	Asic2	Rpl9
Unc5d	0.390577	0.0296009	0.224937		Unc5d	Unc5d	Scml2
Scaf1	0.390553	0.0331395	0.233843		Scaf1	Scaf1	Apoe
Nlgn2	0.390495	0.0242824	0.212816		Nlgn2	Nlgn2	Col9a3
Gltscr1	0.390197	0.0366035	0.243691		Gltscr1	Gltscr1	Dhdh
Crebbp	0.390187	0.0120951	0.1567		Crebbp	Crebbp	Ctnnbl1
Magee1	0.390165	0.002084	0.0768339		Magee1	Magee1	Vcl
Clstn2	0.390096	0.0434497	0.259882		Clstn2	Clstn2	Gtf2h4
Adamts20	0.389121	0.041125	0.254356		Adamts20	Adamts20	Rps18
Rap1gds1	0.388826	0.0024725	0.0799511		Rap1gds1	Rap1gds1	Cope
Spen	0.38876	0.0378391	0.246936		Spen	Spen	Acp1
Nfasc	0.38872	0.00353129	0.0937608		Nfasc	Nfasc	2510009E07Rik
Slc4a8	0.388296	0.00312474	0.0876429		Slc4a8	Slc4a8	Rassf7
Chl1	0.388214	0.00707791	0.124792		Chl1	Chl1	2610301B20Rik
Nog	0.387621	0.0392194	0.249554		Nog	Nog	Eef1g
Naf1	0.387615	0.00216739	0.0776784		Naf1	Naf1	Eif1
Lsm11	0.387417	0.00110149	0.0576643		Lsm11	Lsm11	Anp32a
Cacna1b	0.387343	0.00859382	0.135692		Cacna1b	Cacna1b	Aste1
Grm1	0.387178	0.00841325	0.133924		Grm1	Grm1	Ndufa12
3110052M02Rik	0.387127	0.000658084	0.0493931		3110052M02Rik	3110052M02Rik	Rpl31
Gabra3	0.386943	0.0128945	0.161002		Gabra3	Gabra3	Rps28
Jund	0.386838	6.63097e-05	0.0156293		Jund	Jund	Gltscr2
Rbm38	0.386717	0.0292693	0.223889		Rbm38	Rbm38	Rpl36a
Ablim1	0.386443	0.0198998	0.194722		Ablim1	Ablim1	Bbs9
Boc	0.386431	0.0460283	0.265006		Boc	Boc	Ccdc59
Nos1	0.386427	0.023076	0.207569		Nos1	Nos1	Rpl23
Slc35f1	0.386064	0.00442404	0.103549		Slc35f1	Slc35f1	Haus1
Slit2	0.385862	0.0146503	0.169888		Slit2	Slit2	Ndufb7
Slc7a8	0.385689	0.000942797	0.0536771		Slc7a8	Slc7a8	Nsmce2
Gm14305	0.38513	0.00658515	0.121955		Gm14305	Gm14305	Ift20
Unc5c	0.384992	0.048147	0.270284		Unc5c	Unc5c	Cox16
Bag2	0.384833	0.027767	0.220576		Bag2	Bag2	Man1a
Hk2	0.38482	0.0242777	0.212816		Hk2	Hk2	Gnb2l1
Dvl3	0.384811	0.0331496	0.233843		Dvl3	Dvl3	Rps3
Midn	0.384789	0.0201591	0.195217		Midn	Midn	Cox7c
Pcsk2os2	0.384728	0.037685	0.246854		Pcsk2os2	Pcsk2os2	Cops6
Camsap3	0.384185	0.0327352	0.232572		Camsap3	Camsap3	Hsd17b11
Gpx3	0.384047	0.0380271	0.247055		Gpx3	Gpx3	Dleu7
Ldhd	0.38382	0.0467582	0.266298		Ldhd	Ldhd	Shfm1
Ldlrad3	0.383768	0.00115952	0.0587854		Ldlrad3	Ldlrad3	Bcar3
Nat8l	0.383393	0.00275176	0.0834534		Nat8l	Nat8l	Plin3
Ror2	0.38321	0.0458365	0.264524		Ror2	Ror2	Snrpe
Evi2a	0.382502	0.0436089	0.259882		Evi2a	Evi2a	Fam65b
Wiz	0.382499	0.0308739	0.228913		Wiz	Wiz	Gas5
4933428G20Rik	0.382312	0.0431221	0.259215		4933428G20Rik	4933428G20Rik	Mbip
Abcg2	0.382294	0.0195648	0.193719		Abcg2	Abcg2	Hist1h4h
Trim9	0.382029	0.0119918	0.156138		Trim9	Trim9	Hmgn1
Zmiz1	0.382022	0.0384459	0.248344		Zmiz1	Zmiz1	Scoc
Nxpe3	0.381433	0.00343159	0.0922068		Nxpe3	Nxpe3	Arl6
Irf2bpl	0.381187	0.0332087	0.234081		Irf2bpl	Irf2bpl	Rps11
Msi1	0.380722	0.0267943	0.218857		Msi1	Msi1	Acot11
Klk8	0.380485	0.0488852	0.271936		Klk8	Klk8	Gbe1
Med25	0.380455	0.0344645	0.238207		Med25	Med25	Ndufa1
Orai3	0.380309	0.0234752	0.2097		Orai3	Orai3	Zfp516
Hps6	0.380227	0.0371374	0.245059		Hps6	Hps6	Znhit1
Mreg	0.379554	0.0481423	0.270284		Mreg	Mreg	Rpl14
1700019D03Rik	0.3793	0.0351081	0.239462		1700019D03Rik	1700019D03Rik	Scn9a
Il17rb	0.379275	0.0406405	0.252825		Il17rb	Il17rb	Pipox
Uckl1os	0.378903	0.0448861	0.262034		Uckl1os	Uckl1os	Ap1s2
Dgkz	0.37876	0.000603992	0.0466358		Dgkz	Dgkz	Morn2
Wdtc1	0.378679	0.00598769	0.11733		Wdtc1	Wdtc1	Triqk
Lrfn3	0.378558	0.0401455	0.251591		Lrfn3	Lrfn3	Mrpl30
Pcdhga10	0.378495	0.00243079	0.0799511		Pcdhga10	Pcdhga10	Nkiras2
Megf8	0.378295	0.00459611	0.105734		Megf8	Megf8	Rpl24
Fads3	0.378285	0.00508095	0.11032		Fads3	Fads3	2210404O09Rik
Epn1	0.378071	0.0277831	0.220576		Epn1	Epn1	Pde1b
4933431E20Rik	0.377811	0.005666	0.11568		4933431E20Rik	4933431E20Rik	Lmo4
Zbtb34	0.377722	0.0164968	0.178306		Zbtb34	Zbtb34	Rps20
Tm6sf1	0.377649	0.0413965	0.25512		Tm6sf1	Tm6sf1	Ajap1
Cramp1l	0.377639	0.00279416	0.0839812		Cramp1l	Cramp1l	Gusb
Ifitm2	0.377575	0.0436815	0.259882		Ifitm2	Ifitm2	Rps12
Esyt3	0.37708	0.0301959	0.226209		Esyt3	Esyt3	Cd302
Cmip	0.376994	0.0269057	0.21908		Cmip	Cmip	Rps6ka5
Cdh6	0.376948	0.0312464	0.229415		Cdh6	Cdh6	BC003965
Gpr158	0.376923	0.000849057	0.0531824		Gpr158	Gpr158	Lrch2
Ntn3	0.376826	0.0010122	0.0550564		Ntn3	Ntn3	Cks1b
Galnt14	0.3765	0.0269173	0.21908		Galnt14	Galnt14	Fstl1
Zfp865	0.376488	0.0160578	0.176255		Zfp865	Zfp865	Gm16701
Nfe2l3	0.376484	0.0384485	0.248344		Nfe2l3	Nfe2l3	Rpl35a
Rusc2	0.376464	0.030068	0.225985		Rusc2	Rusc2	Rnps1
Garnl3	0.37619	0.0202594	0.195907		Garnl3	Garnl3	Cenpw
Tacc2	0.375919	0.00471257	0.107097		Tacc2	Tacc2	Trim59
Miat	0.375196	0.0403191	0.251597		Miat	Miat	Iqgap3
Adcy6	0.375068	0.0037928	0.0963641		Adcy6	Adcy6	Hspa8
Map3k9	0.375016	0.0267117	0.218857		Map3k9	Map3k9	Hist1h4k
Gm5595	0.374221	0.0122617	0.157944		Gm5595	Gm5595	Rps6
Igdcc3	0.37408	0.0407059	0.252836		Igdcc3	Igdcc3	Sox8
Prdm8	0.373688	0.020748	0.198681		Prdm8	Prdm8	Rps27a
Sybu	0.373481	0.0128339	0.160842		Sybu	Sybu	Arl4d
Nfkbie	0.373453	0.0428314	0.258882		Nfkbie	Nfkbie	Mterfd3
Otud7a	0.373209	0.000135668	0.0242823		Otud7a	Otud7a	Mks1
Shisa4	0.373173	0.000393752	0.0393341		Shisa4	Shisa4	Syt6
Kcnq1ot1	0.37303	0.0203776	0.196253		Kcnq1ot1	Kcnq1ot1	Apex1
Rbfox1	0.37299	0.000638809	0.0487551		Rbfox1	Rbfox1	Nedd9
Caskin1	0.372915	0.013316	0.162933		Caskin1	Caskin1	Cks2
Homez	0.372883	0.0147106	0.169956		Homez	Homez	Wdr31
Furin	0.37269	0.00961332	0.140999		Furin	Furin	Tagln2
Ryr2	0.372554	0.0190162	0.190801		Ryr2	Ryr2	Acot8
Kcnip2	0.37146	0.00366258	0.0949954		Kcnip2	Kcnip2	Dnal4
Tbc1d5	0.371438	0.0439448	0.260544		Tbc1d5	Tbc1d5	Stat5b
Sema6a	0.371264	0.0095482	0.140726		Sema6a	Sema6a	Rps15
C1qtnf4	0.370744	0.00027972	0.03212		C1qtnf4	C1qtnf4	Rpl3
Zfyve26	0.370251	0.0112205	0.152674		Zfyve26	Zfyve26	Ninj1
Gprin1	0.370089	0.00167684	0.0696289		Gprin1	Gprin1	Syde2
Dpp10	0.37002	0.0428479	0.258882		Dpp10	Dpp10	Tpbg
Zfp319	0.369707	0.0275438	0.220025		Zfp319	Zfp319	Hddc2
Spsb1	0.369474	0.0436515	0.259882		Spsb1	Spsb1	Pbk
Mov10	0.369451	0.0448769	0.262034		Mov10	Mov10	Rpl37
Zfp592	0.369167	0.0269446	0.219128		Zfp592	Zfp592	Col9a2
6430548M08Rik	0.369131	0.00388817	0.0971853		6430548M08Rik	6430548M08Rik	Rpl35
Cdkl2	0.368975	0.00268934	0.0830603		Cdkl2	Cdkl2	Psmg4
Degs2	0.368917	0.0273935	0.219711		Degs2	Degs2	Ufsp2
Nfib	0.368791	0.039691	0.250283		Nfib	Nfib	Plekhb1
Slitrk2	0.368236	0.0429142	0.258882		Slitrk2	Slitrk2	Ezh2
Ctif	0.36817	0.0093969	0.14019		Ctif	Ctif	Fen1
Slc16a4	0.368156	0.0189197	0.190383		Slc16a4	Slc16a4	Lage3
Srrm3	0.368021	0.0156455	0.173697		Srrm3	Srrm3	Rfc4
Syt1	0.367667	0.00120678	0.0593885		Syt1	Syt1	Rps15a-ps6
Arhgap44	0.367533	0.00923037	0.13937		Arhgap44	Arhgap44	Fam84b
Zfp677	0.367496	0.0351543	0.239486		Zfp677	Zfp677	Gabrg1
Cyp20a1	0.367342	0.0282469	0.221851		Cyp20a1	Cyp20a1	C130046K22Rik
Mocs3	0.367109	0.0106011	0.149137		Mocs3	Mocs3	Fau
Sbf1	0.366935	0.0122896	0.158001		Sbf1	Sbf1	Rnf7
Wbscr17	0.366865	0.00308558	0.0874367		Wbscr17	Wbscr17	Rpl7
Nrip1	0.366713	0.0358455	0.241627		Nrip1	Nrip1	Scp2
Fryl	0.366566	0.0122211	0.157572		Fryl	Fryl	Cystm1
Aff3	0.366456	0.00952369	0.140726		Aff3	Aff3	Dnajc9
B4galt6	0.36559	0.000404577	0.0399668		B4galt6	B4galt6	Dtd2
Dopey2	0.365562	0.0289123	0.223803		Dopey2	Dopey2	Dlx6os1
Ubr4	0.365189	0.0241756	0.212816		Ubr4	Ubr4	2610316D01Rik
B3gat1	0.365013	0.0255648	0.214798		B3gat1	B3gat1	Tmem117
Ttc39b	0.36498	0.000395244	0.0393341		Ttc39b	Ttc39b	Rpl5
Rassf5	0.364973	0.0226934	0.206039		Rassf5	Rassf5	Gsta4
Rap2a	0.364606	0.000567458	0.0445837		Rap2a	Rap2a	Churc1
Wdfy3	0.364387	0.0158876	0.175134		Wdfy3	Wdfy3	Stc1
Rhobtb1	0.364007	0.00149144	0.0663076		Rhobtb1	Rhobtb1	Col22a1
Dlgap3	0.363971	0.0375579	0.246527		Dlgap3	Dlgap3	Dnajb3
Mlxip	0.363858	0.0320059	0.231432		Mlxip	Mlxip	Scarna2
Abcg4	0.363318	0.0173171	0.183049		Abcg4	Abcg4	Perp
Cblb	0.363315	0.00574046	0.115921		Cblb	Cblb	Rpf1
E130309D02Rik	0.362662	0.00389966	0.0971853		E130309D02Rik	E130309D02Rik	Erich3
Atp1a3	0.362296	0.0181753	0.185833		Atp1a3	Atp1a3	Nthl1
Csdc2	0.362106	0.00391345	0.0971853		Csdc2	Csdc2	Snrpa1
Hist1h2ai	0.362085	0.0103966	0.147965		Hist1h2ai	Hist1h2ai	Msantd1
Smap1	0.362007	0.00495355	0.109239		Smap1	Smap1	Cdkl4
Kctd12	0.361679	0.0370365	0.244975		Kctd12	Kctd12	Ndst3
Wwc1	0.361234	0.0141827	0.168029		Wwc1	Wwc1	Trank1
Unc5b	0.361155	0.027474	0.219841		Unc5b	Unc5b	Gad1
Efna4	0.360705	0.0372029	0.245131		Efna4	Efna4	Ptgfrn
Prr5	0.360573	0.032662	0.232572		Prr5	Prr5	Arhgef37
Itga4	0.360498	0.0474667	0.26806		Itga4	Itga4	Dlx5
Vangl1	0.359869	0.0497128	0.272943		Vangl1	Vangl1	Zfp97
Cadm3	0.359852	0.00569302	0.11568		Cadm3	Cadm3	Kxd1
Tnrc6c	0.359427	0.0165495	0.178483		Tnrc6c	Tnrc6c	2410004N09Rik
Slc2a6	0.359291	0.028014	0.221175		Slc2a6	Slc2a6	Galnt18
Grn	0.359245	0.00683493	0.122744		Grn	Grn	Lsm4
Mast3	0.359111	0.0361502	0.242264		Mast3	Mast3	Rpl37a
Bcl9	0.358868	0.0249409	0.213222		Bcl9	Bcl9	Tpt1
Cntfr	0.358862	0.0459429	0.264684		Cntfr	Cntfr	1810010H24Rik
Crtc3	0.35886	0.0424693	0.258295		Crtc3	Crtc3	Snhg12
Gdap10	0.358759	0.0305444	0.227727		Gdap10	Gdap10	Suclg2
1700001L19Rik	0.358602	0.0307516	0.228391		1700001L19Rik	1700001L19Rik	Ldhb
Slc16a7	0.358337	0.0315622	0.230552		Slc16a7	Slc16a7	Cnn2
Map7d1	0.35799	0.0387546	0.249093		Map7d1	Map7d1	Chaf1b
Slc4a10	0.357881	0.0200236	0.195081		Slc4a10	Slc4a10	Scml4
Bri3bp	0.357838	7.22663e-05	0.0164559		Bri3bp	Bri3bp	Mir6236
Rsad1	0.357494	0.00698473	0.124065		Rsad1	Rsad1	Rps7
Pnpla6	0.357489	0.000682407	0.0494677		Pnpla6	Pnpla6	Cpped1
Kcnk3	0.357485	0.0431995	0.259448		Kcnk3	Kcnk3	Hist1h4a
Scn2a1	0.35731	0.011273	0.152674		Scn2a1	Scn2a1	Eif6
Sall3	0.357294	0.0351008	0.239462		Sall3	Sall3	Sema3e
Glb1	0.3565	0.000780903	0.0509743		Glb1	Glb1	Ptprm
Zkscan17	0.355932	0.00296586	0.086811		Zkscan17	Zkscan17	B3galt5
Limch1	0.355918	0.0216981	0.20179		Limch1	Limch1	Isoc1
5031439G07Rik	0.355639	0.00704766	0.124422		5031439G07Rik	5031439G07Rik	Lrrc9
Gpr12	0.354677	0.0235426	0.209884		Gpr12	Gpr12	C430049B03Rik
Ankrd23	0.35449	0.0482728	0.270451		Ankrd23	Ankrd23	Cxcl14
Ank	0.353891	0.00123073	0.060346		Ank	Ank	Cdh22
Homer2	0.353482	0.0131343	0.162336		Homer2	Homer2	Hmgcs2
Kcnj11	0.353156	0.00973287	0.142286		Kcnj11	Kcnj11	Mnat1
Gm16596	0.35287	0.0362	0.242264		Gm16596	Gm16596	Spc25
Rab6b	0.352695	0.00894586	0.137201		Rab6b	Rab6b	Plcxd3
Slc31a2	0.352618	0.00501124	0.109473		Slc31a2	Slc31a2	Kctd8
Ndrg3	0.352483	0.00836891	0.133592		Ndrg3	Ndrg3	Kcna5
Qpct	0.351485	0.0314796	0.230393		Qpct	Qpct	Metrn
Fasn	0.351052	0.00113667	0.0581713		Fasn	Fasn	Snhg1
Gm14326	0.350744	0.00938386	0.14019		Gm14326	Gm14326	Zswim7
Nphp3	0.350285	0.00349229	0.093093		Nphp3	Nphp3	Foxp2
Cacna1d	0.350222	0.0158802	0.175134		Cacna1d	Cacna1d	Cenpq
Spaca6	0.350187	0.046453	0.265803		Spaca6	Spaca6	Cd82
Tmppe	0.349407	0.0152361	0.172333		Tmppe	Tmppe	Gm973
Hr	0.348985	0.0247058	0.212907		Hr	Hr	Cyba
Zfp385b	0.34898	0.0453787	0.263012		Zfp385b	Zfp385b	Oxsm
Fscn1	0.348926	0.0242197	0.212816		Fscn1	Fscn1	Isoc2a
Leng1	0.348566	0.0151133	0.171493		Leng1	Leng1	Nudt14
Ralb	0.3482	0.00748676	0.127808		Ralb	Ralb	Rfc3
Fjx1	0.348061	0.00661553	0.122087		Fjx1	Fjx1	Mxd3
Rwdd3	0.347851	0.035333	0.240354		Rwdd3	Rwdd3	Cox7a2l
Vwa5b2	0.347639	0.0362637	0.24239		Vwa5b2	Vwa5b2	Wdr17
E330033B04Rik	0.347625	0.0345246	0.238207		E330033B04Rik	E330033B04Rik	2610044O15Rik8
Sh3yl1	0.347364	0.012367	0.158239		Sh3yl1	Sh3yl1	Zfp617
Fabp3	0.347213	0.0416327	0.25568		Fabp3	Fabp3	Cpne8
Flt1	0.347074	0.0206914	0.198422		Flt1	Flt1	Isyna1
Dcaf12l1	0.346838	0.00271084	0.0834534		Dcaf12l1	Dcaf12l1	6530411M01Rik
Gpr135	0.34674	0.0275625	0.220025		Gpr135	Gpr135	Rps8
Antxr1	0.346677	0.017869	0.184858		Antxr1	Antxr1	Lars2
Gabra1	0.346498	0.0107173	0.149674		Gabra1	Gabra1	Cdh8
Syndig1	0.346422	0.00075409	0.0508836		Syndig1	Syndig1	Ano3
Fbxl17	0.345832	0.00910862	0.139227		Fbxl17	Fbxl17	Tspan9
Ptprg	0.345572	0.00684296	0.122744		Ptprg	Ptprg	Prim1
Dusp15	0.345555	0.0245584	0.212816		Dusp15	Dusp15	Mettl18
Car15	0.344838	0.0433536	0.259793		Car15	Car15	4732491K20Rik
Caskin2	0.344341	0.0300021	0.22585		Caskin2	Caskin2	Pcp4
Kdm8	0.343746	0.0254176	0.214695		Kdm8	Kdm8	Hist4h4
Trpm3	0.343745	0.0076796	0.129617		Trpm3	Trpm3	Ecel1
Fam222b	0.34334	0.042777	0.258882		Fam222b	Fam222b	Micu1
Eps8	0.343255	0.0492611	0.272355		Eps8	Eps8	P4ha3
Adam15	0.343156	0.00556393	0.115376		Adam15	Adam15	Rps14
Npas3	0.342774	0.0211861	0.20043		Npas3	Npas3	Gm166
Ern1	0.342671	0.0163529	0.178055		Ern1	Ern1	9930014A18Rik
Anks6	0.342334	0.00508525	0.11032		Anks6	Anks6	Plk2
Adrbk2	0.34195	0.0377063	0.246869		Adrbk2	Adrbk2	Rpl14-ps1
Sh2b2	0.341899	0.0334096	0.234765		Sh2b2	Sh2b2	Anxa2
Epb4.1l4a	0.341802	0.0498521	0.273502		Epb4.1l4a	Epb4.1l4a	Ttpa
Pip5k1c	0.341758	0.0170913	0.18195		Pip5k1c	Pip5k1c	Pola1
Pacs1	0.341612	0.0116949	0.154495		Pacs1	Pacs1	Gucy1b3
Mfsd12	0.34151	0.01536	0.172832		Mfsd12	Mfsd12	2810429I04Rik
Mpv17l2	0.34099	0.037863	0.246936		Mpv17l2	Mpv17l2	Smim3
Pkp4	0.340944	0.00396967	0.0978578		Pkp4	Pkp4	Nme5
Kcnn2	0.3402	0.0288458	0.223803		Kcnn2	Kcnn2	Entpd3
Gga3	0.340094	0.0338598	0.236716		Gga3	Gga3	Rps23
Fbxl16	0.340032	0.0132623	0.162509		Fbxl16	Fbxl16	Gm15663
BC048403	0.339425	0.0435225	0.259882		BC048403	BC048403	Cby1
2810408M09Rik	0.339326	0.000866409	0.0533954		2810408M09Rik	2810408M09Rik	Cutc
Rhbdf1	0.338476	0.0054133	0.113561		Rhbdf1	Rhbdf1	Mxra8
Draxin	0.337693	0.00406486	0.0989338		Draxin	Draxin	Pde10a
Arap1	0.33709	0.0112184	0.152674		Arap1	Arap1	Carhsp1
Cuedc1	0.336427	0.005287	0.112773		Cuedc1	Cuedc1	Gm2115
Lrsam1	0.336409	0.000236722	0.0308932		Lrsam1	Lrsam1	Mrpl54
Neo1	0.336245	0.00075479	0.0508836		Neo1	Neo1	Vrk1
Dennd1a	0.335904	0.0127291	0.160428		Dennd1a	Dennd1a	Anp32b
Scarb1	0.335834	0.0104262	0.14809		Scarb1	Scarb1	Psmc3ip
Ubash3b	0.335473	0.00837249	0.133592		Ubash3b	Ubash3b	Smim20
Aatk	0.335355	0.0178752	0.184858		Aatk	Aatk	Ddo
Ctbp2	0.335315	0.0407255	0.25284		Ctbp2	Ctbp2	Etv1
Vamp2	0.33521	0.0155864	0.173634		Vamp2	Vamp2	S100a6
Gp1bb	0.335055	0.0309686	0.229221		Gp1bb	Gp1bb	Zfp764
Sema4g	0.335031	0.0424499	0.258294		Sema4g	Sema4g	Ikzf2
Myo19	0.333977	0.0240255	0.212217		Myo19	Myo19	Snord2
Lmna	0.33388	0.0173051	0.183049		Lmna	Lmna	Nqo1
Atp6v0a1	0.333867	0.0143897	0.168991		Atp6v0a1	Atp6v0a1	Ngdn
Adamts3	0.333355	0.0135795	0.164625		Adamts3	Adamts3	P2rx2
Tsc22d2	0.333316	0.000996713	0.0550564		Tsc22d2	Tsc22d2	Gpr88
Ctnnd2	0.333201	0.0370736	0.244975		Ctnnd2	Ctnnd2	Gpx1
Tmem201	0.333127	0.0485492	0.271039		Tmem201	Tmem201	Dclk3
Scn8a	0.33268	0.0204191	0.196372		Scn8a	Scn8a	Il13ra1
Plcb4	0.332325	0.00433138	0.102451		Plcb4	Plcb4	Itpka
Aff1	0.332121	0.0340141	0.237146		Aff1	Aff1	Rabl3
Snrnp35	0.331989	0.0113122	0.15281		Snrnp35	Snrnp35	Slc35d3
Cplx2	0.331512	0.011516	0.153948		Cplx2	Cplx2	Zfp521
2810002D19Rik	0.331241	0.0295744	0.224937		2810002D19Rik	2810002D19Rik	Kif27
Mfsd6	0.330748	0.0015022	0.0663076		Mfsd6	Mfsd6	Snrpn
Neurod2	0.330653	0.0438032	0.260189		Neurod2	Neurod2	Rasgrf1
Lsm2	0.330553	0.011056	0.151829		Lsm2	Lsm2	Dnah6
Bend3	0.330498	0.0343968	0.237961		Bend3	Bend3	Epor
Bach2	0.329782	0.0375717	0.246527		Bach2	Bach2	Ramp1
Ubqln2	0.329622	0.0397167	0.250283		Ubqln2	Ubqln2	Iqcg
Psd	0.329221	0.00910907	0.139227		Psd	Psd	Nfs1
Cyb5d2	0.329142	0.0201241	0.195217		Cyb5d2	Cyb5d2	Il1rapl1
Tub	0.329111	0.00830763	0.133553		Tub	Tub	Akap5
Habp4	0.328621	0.0133807	0.163575		Habp4	Habp4	Sytl5
Syngap1	0.328388	0.0489975	0.27213		Syngap1	Syngap1	Scarna13
Cdc42bpb	0.32812	0.0238739	0.211713		Cdc42bpb	Cdc42bpb	Flrt3
Ephb2	0.328004	0.0100488	0.144701		Ephb2	Ephb2	Rasgef1b
Znrf2	0.327984	0.0116722	0.154346		Znrf2	Znrf2	Dnaic1
Pex5l	0.327339	0.0227183	0.206063		Pex5l	Pex5l	Spats2l
Pag1	0.327305	0.00227996	0.0781411		Pag1	Pag1	2810468N07Rik
Xrcc3	0.327175	0.0474194	0.267981		Xrcc3	Xrcc3	Mns1
R3hdm2	0.326908	0.0498758	0.273502		R3hdm2	R3hdm2	Pcbp2
Rhob	0.326823	0.00584713	0.116552		Rhob	Rhob	Ccpg1os
Dhtkd1	0.326487	0.0126607	0.160065		Dhtkd1	Dhtkd1	Spata18
Dchs1	0.32634	0.0288385	0.223803		Dchs1	Dchs1	Nlrp5-ps
Zfp809	0.326248	0.00771414	0.130037		Zfp809	Zfp809	Dctd
Zmynd8	0.326196	0.0390923	0.249514		Zmynd8	Zmynd8	Tmem59l
Slc9a8	0.325915	0.00623294	0.118565		Slc9a8	Slc9a8	Alox5ap
Rnf157	0.325579	0.0331208	0.233843		Rnf157	Rnf157	1110015O18Rik
Dok4	0.324789	0.0416395	0.25568		Dok4	Dok4	Stk33
Flot2	0.324785	0.00276637	0.0835195		Flot2	Flot2	Map3k19
Maz	0.324758	0.0244806	0.212816		Maz	Maz	Ankef1
Itpripl2	0.324693	0.0273726	0.219711		Itpripl2	Itpripl2	Rnd3
5930403L14Rik	0.324296	0.0395877	0.250283		5930403L14Rik	5930403L14Rik	Bmp6
Srcin1	0.324281	0.0445948	0.261932		Srcin1	Srcin1	Synpr
Srxn1	0.324085	0.0260732	0.217169		Srxn1	Srxn1	Id4
Gpr124	0.324018	0.0324153	0.232514		Gpr124	Gpr124	Cntnap3
Arl8a	0.323647	0.0026747	0.0829897		Arl8a	Arl8a	Cdca7
Pcdhga2	0.323469	0.0190749	0.191104		Pcdhga2	Pcdhga2	Rarb
Spry4	0.323024	0.0362089	0.242264		Spry4	Spry4	Ndufs6
Cttnbp2	0.322891	0.00476513	0.10764		Cttnbp2	Cttnbp2	1700026D08Rik
Nfil3	0.322855	0.0249804	0.213222		Nfil3	Nfil3	Moxd1
Usp46	0.322588	0.00611328	0.117668		Usp46	Usp46	Rmrp
Efnb2	0.322291	0.0272037	0.219711		Efnb2	Efnb2	Chchd5
Sox10	0.321913	0.0361574	0.242264		Sox10	Sox10	Fam98b
Apba1	0.321894	0.00883459	0.136578		Apba1	Apba1	Bcdin3d
Thra	0.321791	0.00267265	0.0829897		Thra	Thra	Itgal
Gnao1	0.321525	0.0150886	0.171374		Gnao1	Gnao1	Mdfi
Asxl1	0.321303	0.0319881	0.231432		Asxl1	Asxl1	Ppp1r1b
Arhgef26	0.321278	0.0252538	0.214195		Arhgef26	Arhgef26	Fads6
Coro1a	0.321217	0.0207992	0.198815		Coro1a	Coro1a	Irf6
Plbd2	0.321216	0.0166449	0.179096		Plbd2	Plbd2	Tmem243
Rnpepl1	0.321056	0.0487334	0.271448		Rnpepl1	Rnpepl1	Hapln3
Csgalnact1	0.320899	0.0254413	0.214695		Csgalnact1	Csgalnact1	Sstr5
Col11a1	0.32088	0.0225845	0.205431		Col11a1	Col11a1	Armc3
Kcnq3	0.320814	0.00659797	0.121955		Kcnq3	Kcnq3	Ccdc81
Ncam1	0.320699	0.00182134	0.0717586		Ncam1	Ncam1	Abat
Ndor1	0.320619	0.0163682	0.178062		Ndor1	Ndor1	Wdr86
Sall1	0.320373	0.0185345	0.188232		Sall1	Sall1	Frem2
Stx1a	0.31985	0.0099582	0.144013		Stx1a	Stx1a	Slc5a5
Sbk1	0.31966	0.0150463	0.17117		Sbk1	Sbk1	Pfdn2
Cdh9	0.31963	0.0411399	0.254356		Cdh9	Cdh9	Cenph
Siah2	0.318806	0.019731	0.193918		Siah2	Siah2	Zmynd10
Ptprn2	0.318773	0.0109953	0.151829		Ptprn2	Ptprn2	Rbms1
Sox12	0.318755	0.0305212	0.22768		Sox12	Sox12	Galnt13
Tfr2	0.318069	0.0454962	0.2633		Tfr2	Tfr2	Ogn
Cpd	0.318026	0.013836	0.166267		Cpd	Cpd	BB031773
Rhof	0.317681	0.0326282	0.232572		Rhof	Rhof	Tap1
Pacs2	0.317345	0.0154278	0.173016		Pacs2	Pacs2	Ccdc135
Elmsan1	0.316715	0.0274342	0.219711		Elmsan1	Elmsan1	Tekt4
Pnpla2	0.31654	0.0467296	0.266298		Pnpla2	Pnpla2	Pifo
Sipa1	0.315671	0.0111949	0.152674		Sipa1	Sipa1	Fus
Enah	0.31525	0.00665006	0.122215		Enah	Enah	Odc1
Sst	0.314905	0.0140997	0.167377		Sst	Sst	Kcnj12
Zfp36l2	0.31425	0.0346965	0.238683		Zfp36l2	Zfp36l2	Hist1h1d
Cd276	0.313176	0.0128516	0.160914		Cd276	Cd276	Mei4
Hcn3	0.312571	0.0140146	0.16735		Hcn3	Hcn3	Casq1
Nab1	0.311888	0.0271006	0.21956		Nab1	Nab1	Ctsz
Bcl7a	0.311818	0.00783566	0.130722		Bcl7a	Bcl7a	Car11
Uggt2	0.311392	0.00150141	0.0663076		Uggt2	Uggt2	Rplp0
Eef2k	0.310893	0.00230815	0.0787057		Eef2k	Eef2k	2410004P03Rik
Irs2	0.310581	0.0236256	0.210205		Irs2	Irs2	Ptrf
Ppp1r9b	0.310391	0.00338276	0.0921205		Ppp1r9b	Ppp1r9b	H19
Pik3r2	0.310013	0.00787374	0.131083		Pik3r2	Pik3r2	Myh6
Map1lc3a	0.309785	0.00563221	0.115525		Map1lc3a	Map1lc3a	Nexn
Ssx2ip	0.309621	0.0313685	0.229916		Ssx2ip	Ssx2ip	Mgst1
Nrbp2	0.309365	0.00300481	0.0871337		Nrbp2	Nrbp2	G0s2
Dmpk	0.309228	0.0209494	0.198955		Dmpk	Dmpk	Fxyd1
Plxna4	0.308601	0.0181053	0.1854		Plxna4	Plxna4	Mt3
Slc17a7	0.308512	0.0420726	0.256818		Slc17a7	Slc17a7	Rps3a1
Capn5	0.308471	0.00615175	0.117995		Capn5	Capn5	Lrp2
9430091E24Rik	0.308408	0.0379162	0.247044		9430091E24Rik	9430091E24Rik	Hist1h1c
Trrap	0.307981	0.0275875	0.220094		Trrap	Trrap	Vit
Unc13a	0.307676	0.0118285	0.155343		Unc13a	Unc13a	Tekt1
Ehd1	0.307536	0.00396156	0.0978375		Ehd1	Ehd1	Prkch
Gpr26	0.307424	0.0424911	0.258311		Gpr26	Gpr26	LOC100861615
Tonsl	0.307364	0.0442139	0.26092		Tonsl	Tonsl	Trim30d
4930526I15Rik	0.307171	0.0387596	0.249093		4930526I15Rik	4930526I15Rik	Use1
Osbp2	0.306833	0.0391297	0.249514		Osbp2	Osbp2	Casq2
Fbln1	0.306762	0.0479718	0.270118		Fbln1	Fbln1	Lyz2
Rnf126	0.306624	0.0216852	0.20179		Rnf126	Rnf126	Ikzf1
Phlpp1	0.306441	0.000700697	0.0494677		Phlpp1	Phlpp1	Ebf1
Palm	0.306409	0.0367672	0.244176		Palm	Palm	Zfp951
Zc3h7b	0.306365	0.00886082	0.136578		Zc3h7b	Zc3h7b	Cacna2d3
Ints5	0.306344	0.024876	0.213144		Ints5	Ints5	Sertad4
Pcdhga9	0.305798	0.0433476	0.259793		Pcdhga9	Pcdhga9	Hrh1
Wdr81	0.305445	0.00443383	0.103559		Wdr81	Wdr81	Prokr2
Igdcc4	0.305207	0.0353756	0.240494		Igdcc4	Igdcc4	Zfp947
Foxj2	0.30505	0.032627	0.232572		Foxj2	Foxj2	Cdpf1
Zfp142	0.304844	0.0261457	0.217638		Zfp142	Zfp142	Emp1
Gatm	0.304777	0.0195818	0.193719		Gatm	Gatm	Cftr
Tmem63c	0.304377	0.0019688	0.07472		Tmem63c	Tmem63c	Tmprss9
Atp2b2	0.303986	0.0428409	0.258882		Atp2b2	Atp2b2	Nfam1
Col4a1	0.303355	0.0307666	0.228391		Col4a1	Col4a1	Slc5a7
1810055G02Rik	0.303002	0.0262549	0.218127		1810055G02Rik	1810055G02Rik	Gm17762
Zfp583	0.302909	0.00509225	0.11032		Zfp583	Zfp583	Cep128
Wasl	0.302471	0.0448955	0.262034		Wasl	Wasl	Tex15
Nr1d1	0.302281	0.00295898	0.0867988		Nr1d1	Nr1d1	Skap2
D430041D05Rik	0.301572	0.0129428	0.161454		D430041D05Rik	D430041D05Rik	Lamp5
Adam11	0.301507	0.0435808	0.259882		Adam11	Adam11	Coa4
Mapt	0.301455	0.00247883	0.0799511		Mapt	Mapt	Ankrd63
Dennd2a	0.301037	0.02352	0.209822		Dennd2a	Dennd2a	Gprin3
A230077H06Rik	0.301005	0.0113171	0.15281		A230077H06Rik	A230077H06Rik	Fut10
Adarb1	0.300867	0.0191269	0.191483		Adarb1	Adarb1	Abhd3
Acsl4	0.300628	0.0239907	0.212189		Acsl4	Acsl4	Col25a1
Fkbp1b	0.300582	0.0392302	0.249554		Fkbp1b	Fkbp1b	Igsf10
Med13l	0.300452	0.0363532	0.242746		Med13l	Med13l	Arrdc3
Tbc1d8	0.299943	0.0077417	0.130175		Tbc1d8	Tbc1d8	Zcchc12
Igf1r	0.299276	0.0412677	0.25492		Igf1r	Igf1r	Dnajb13
Grina	0.29927	0.00493551	0.10906		Grina	Grina	Gabra5
Cotl1	0.299269	0.00417293	0.0999346		Cotl1	Cotl1	1500012F01Rik
Tbc1d22b	0.298902	0.0191936	0.192008		Tbc1d22b	Tbc1d22b	C030037D09Rik
Fbxo46	0.298373	0.00486069	0.108495		Fbxo46	Fbxo46	Arg2
Tango2	0.298207	0.00628923	0.118991		Tango2	Tango2	Nradd
Bai2	0.296873	0.0391868	0.249514		Bai2	Bai2	Esrrg
B4galt5	0.296336	0.0022645	0.0780091		B4galt5	B4galt5	2410006H16Rik
Klf12	0.296322	0.0258287	0.2154		Klf12	Klf12	Igsf1
Amph	0.295972	0.01427	0.168173		Amph	Amph	Stard10
Traf3	0.29589	0.00873762	0.136025		Traf3	Traf3	Cntn5
Fam171a2	0.295817	0.00141332	0.0658221		Fam171a2	Fam171a2	Dynll2
Ep300	0.295763	0.0199826	0.194965		Ep300	Ep300	Gucy1a3
Gas2	0.295352	0.0132366	0.162406		Gas2	Gas2	Filip1
Edem1	0.295285	0.0383225	0.248007		Edem1	Edem1	Gm10440
Epb4.1l1	0.295058	0.0149083	0.170694		Epb4.1l1	Epb4.1l1	Srek1ip1
Kdr	0.295051	0.0445998	0.261932		Kdr	Kdr	Arhgap36
Tcea2	0.295028	0.0207411	0.198681		Tcea2	Tcea2	Lgals3
Apcdd1	0.294965	0.0240958	0.212672		Apcdd1	Apcdd1	Penk
Slc39a14	0.294936	0.0115578	0.1542		Slc39a14	Slc39a14	Dnaic2
Cdc42ep2	0.294517	0.0405753	0.252726		Cdc42ep2	Cdc42ep2	Pcdh11x
Nrxn2	0.293884	0.00923184	0.13937		Nrxn2	Nrxn2	Arhgdib
Coro2a	0.293687	0.0139286	0.166635		Coro2a	Coro2a	Calb1
Celf4	0.293425	0.00302954	0.0872092		Celf4	Celf4	Fgfbp1
Lrp10	0.293214	0.0484174	0.270585		Lrp10	Lrp10	Dmkn
Cebpg	0.293188	0.0230773	0.207569		Cebpg	Cebpg	Klhl13
Htt	0.293102	0.018536	0.188232		Htt	Htt	D430036J16Rik
Rcor2	0.292839	0.00402825	0.0987807		Rcor2	Rcor2	Rgs4
Sh3bp2	0.292779	0.0196721	0.193786		Sh3bp2	Sh3bp2	Ppil1
Sprn	0.292553	0.0153216	0.172583		Sprn	Sprn	Tmem86a
St3gal5	0.292513	0.0164966	0.178306		St3gal5	St3gal5	Itih3
Frmd4a	0.292481	0.00885352	0.136578		Frmd4a	Frmd4a	Slc27a2
Vat1	0.292285	0.0289683	0.223803		Vat1	Vat1	B3gnt2
Ypel3	0.292112	0.00184343	0.0723058		Ypel3	Ypel3	Pla2g16
Tubg2	0.291633	0.00354081	0.0938279		Tubg2	Tubg2	Lrrc56
Numbl	0.291442	0.0319672	0.231432		Numbl	Numbl	Tmtc2
Pafah2	0.291365	0.00886464	0.136578		Pafah2	Pafah2	Rec8
Jdp2	0.290887	0.038682	0.249014		Jdp2	Jdp2	Pde7b
Insm1	0.290862	0.0225338	0.205109		Insm1	Insm1	2610018G03Rik
Arhgap39	0.290778	0.039493	0.250278		Arhgap39	Arhgap39	Egr2
Pgrmc2	0.29045	0.0153072	0.172583		Pgrmc2	Pgrmc2	Rgs2
Bzrap1	0.290321	0.0411273	0.254356		Bzrap1	Bzrap1	Adra2b
Trp53rk	0.290124	0.0118418	0.155366		Trp53rk	Trp53rk	Rbp1
Mthfd1l	0.290076	0.0463425	0.265803		Mthfd1l	Mthfd1l	Lefty2
Upf1	0.290038	0.0471344	0.26742		Upf1	Upf1	Rgs10
Chd5	0.289968	0.015325	0.172583		Chd5	Chd5	Nfya
Reps1	0.289901	0.00378841	0.0963641		Reps1	Reps1	Gabrd
Ispd	0.289572	0.0246476	0.212816		Ispd	Ispd	Slc22a3
Dmd	0.289169	0.0309692	0.229221		Dmd	Dmd	Agbl2
Elavl2	0.288988	0.029395	0.22426		Elavl2	Elavl2	Mkln1os
Sik1	0.288934	0.0126865	0.160065		Sik1	Sik1	4930451C15Rik
Farp1	0.28887	0.0379829	0.247055		Farp1	Farp1	Meis1
Gm14057	0.288488	0.0325954	0.232572		Gm14057	Gm14057	Fhit
C77370	0.28843	0.0121293	0.15684		C77370	C77370	Rd3
Hs6st1	0.287823	0.045327	0.262872		Hs6st1	Hs6st1	Lrrc23
Gdpd5	0.287664	0.0449329	0.262034		Gdpd5	Gdpd5	Gpr149
Dpysl2	0.287647	0.0004894	0.0423525		Dpysl2	Dpysl2	Tcfl5
Kcna2	0.287414	0.00577421	0.116133		Kcna2	Kcna2	Fam196b
Tmem179	0.287253	0.0029796	0.0868349		Tmem179	Tmem179	Sh3rf2
Tmc7	0.286857	0.0081527	0.132605		Tmc7	Tmc7	Ube2cbp
Phlpp2	0.286514	0.0116495	0.154346		Phlpp2	Phlpp2	Hmgb2
Katnal1	0.286427	0.0252756	0.214245		Katnal1	Katnal1	Rsph1
Zfr2	0.286282	0.0291513	0.223803		Zfr2	Zfr2	Gpr83
Prkx	0.285921	0.0278551	0.220576		Prkx	Prkx	Isl1
Ninl	0.28571	0.0112681	0.152674		Ninl	Ninl	Mlf1
Desi1	0.285109	0.0258029	0.2154		Desi1	Desi1	Acer2
Mapk8ip2	0.284815	0.00982269	0.142938		Mapk8ip2	Mapk8ip2	Ift52
5730409E04Rik	0.284647	0.035412	0.240494		5730409E04Rik	5730409E04Rik	Olfml1
Med15	0.283983	0.0461296	0.265165		Med15	Med15	Adora2a
D630045J12Rik	0.283718	0.0477931	0.269337		D630045J12Rik	D630045J12Rik	Ido1
Lifr	0.283717	0.00173121	0.0699249		Lifr	Lifr	Rpl29
Mboat7	0.283671	0.0229091	0.206844		Mboat7	Mboat7	Yipf3
Pcdh17	0.283331	0.0461896	0.265196		Pcdh17	Pcdh17	Pi16
Inpp5b	0.282767	0.0120534	0.156552		Inpp5b	Inpp5b	Lhx8
Mapk8ip1	0.282587	0.0045703	0.105502		Mapk8ip1	Mapk8ip1	Pde1c
Cat	0.282356	0.0263303	0.218255		Cat	Cat	Ankrd37
Ldlr	0.281663	0.0196743	0.193786		Ldlr	Ldlr	C030013G03Rik
Samd14	0.281092	0.024567	0.212816		Samd14	Samd14	Atp6ap1l
Sos1	0.280675	0.0397174	0.250283		Sos1	Sos1	Col6a5
Scd1	0.280045	0.025817	0.2154		Scd1	Scd1	Nkx2-1
Slc25a1	0.279856	0.00192456	0.073665		Slc25a1	Slc25a1	Crabp1
Cep131	0.279359	0.0382141	0.247783		Cep131	Cep131	E030019B13Rik
2310003H01Rik	0.279274	0.0329649	0.233465		2310003H01Rik	2310003H01Rik	Gm10421
Kctd15	0.278993	0.0128756	0.161002		Kctd15	Kctd15	AI606473
Grin2b	0.278678	0.0172983	0.183049		Grin2b	Grin2b	Gpr174
Polr3c	0.278629	0.0389858	0.249514		Polr3c	Polr3c
Irgq	0.27855	0.000252016	0.031597		Irgq	Irgq
Cluh	0.278359	0.039157	0.249514		Cluh	Cluh
Palm2	0.278227	0.00783876	0.130722		Palm2	Palm2
Eps15	0.278033	0.0303657	0.226772		Eps15	Eps15
Nrxn1	0.277435	0.00524547	0.112641		Nrxn1	Nrxn1
Fbxo10	0.276988	0.0267141	0.218857		Fbxo10	Fbxo10
Cpeb2	0.276838	0.0402954	0.251597		Cpeb2	Cpeb2
Baiap2	0.275522	0.0427112	0.258882		Baiap2	Baiap2
Hip1	0.275193	0.0184614	0.188044		Hip1	Hip1
Cacnb1	0.27509	0.0233888	0.209346		Cacnb1	Cacnb1
Ssbp4	0.274824	0.00628237	0.118991		Ssbp4	Ssbp4
Wscd2	0.274346	0.0495769	0.272943		Wscd2	Wscd2
Ptprf	0.274234	0.0455068	0.2633		Ptprf	Ptprf
Ephb3	0.273885	0.0223518	0.204284		Ephb3	Ephb3
Wscd1	0.273004	0.0220446	0.20326		Wscd1	Wscd1
Arhgef11	0.272505	0.00717371	0.125543		Arhgef11	Arhgef11
Esyt1	0.272202	0.0397164	0.250283		Esyt1	Esyt1
Smim13	0.272199	0.0145684	0.169888		Smim13	Smim13
Sec61a2	0.272188	0.00606125	0.11733		Sec61a2	Sec61a2
Cd200	0.272112	0.0108862	0.151247		Cd200	Cd200
Naglu	0.272013	0.0359823	0.242074		Naglu	Naglu
Rptor	0.271619	0.00790254	0.131399		Rptor	Rptor
Clcn6	0.270808	0.00659121	0.121955		Clcn6	Clcn6
Smad1	0.270723	0.00596154	0.11733		Smad1	Smad1
Rnf216	0.270656	0.0245851	0.212816		Rnf216	Rnf216
Cables2	0.270459	0.0242028	0.212816		Cables2	Cables2
Pkd1	0.270371	0.0324543	0.232517		Pkd1	Pkd1
Xkr4	0.270097	0.0115568	0.1542		Xkr4	Xkr4
Stxbp5	0.269769	0.00679034	0.122566		Stxbp5	Stxbp5
Slc46a1	0.268954	0.015643	0.173697		Slc46a1	Slc46a1
Papd7	0.268809	0.0220156	0.20321		Papd7	Papd7
Map4	0.268	0.000459643	0.041445		Map4	Map4
Adam19	0.266567	0.00741198	0.127218		Adam19	Adam19
Sptbn2	0.266459	0.00824116	0.133237		Sptbn2	Sptbn2
Rnf38	0.266258	0.0134595	0.163942		Rnf38	Rnf38
Atp2b3	0.265871	0.0112083	0.152674		Atp2b3	Atp2b3
Bloc1s3	0.265613	0.0378512	0.246936		Bloc1s3	Bloc1s3
Ybx3	0.264786	0.0160011	0.175921		Ybx3	Ybx3
Mib1	0.264622	1.06048e-05	0.00598849		Mib1	Mib1
Tmem151b	0.264561	0.00119719	0.0593885		Tmem151b	Tmem151b
Ahr	0.26447	0.0413741	0.25512		Ahr	Ahr
Map3k10	0.264464	0.0415115	0.255595		Map3k10	Map3k10
Mapk11	0.264188	0.0208655	0.198821		Mapk11	Mapk11
Fam171b	0.264075	0.0184856	0.188147		Fam171b	Fam171b
Dact3	0.263962	0.00873757	0.136025		Dact3	Dact3
C2cd4c	0.263873	0.0256791	0.215198		C2cd4c	C2cd4c
Ets2	0.263662	0.0222145	0.203444		Ets2	Ets2
Crmp1	0.263308	0.00928291	0.139401		Crmp1	Crmp1
Tmem63b	0.263252	0.0465897	0.265976		Tmem63b	Tmem63b
Ypel1	0.263057	0.0192335	0.192224		Ypel1	Ypel1
Phldb1	0.262707	0.00662764	0.122143		Phldb1	Phldb1
Pclo	0.262473	0.0282699	0.221851		Pclo	Pclo
Mgat3	0.262446	0.0155154	0.173419		Mgat3	Mgat3
Lpp	0.2612	0.034287	0.23772		Lpp	Lpp
Fam129b	0.261058	0.0200988	0.195217		Fam129b	Fam129b
Basp1	0.260877	0.00813458	0.13247		Basp1	Basp1
Olig2	0.260548	0.0263823	0.218255		Olig2	Olig2
Diras2	0.260455	0.0292722	0.223889		Diras2	Diras2
Klhdc8a	0.260292	0.0497124	0.272943		Klhdc8a	Klhdc8a
Ncoa3	0.259906	0.026453	0.218436		Ncoa3	Ncoa3
Fry	0.259583	0.00740302	0.127218		Fry	Fry
9330159F19Rik	0.259314	0.0045436	0.105066		9330159F19Rik	9330159F19Rik
Sarm1	0.258837	0.0447217	0.261932		Sarm1	Sarm1
Sertad2	0.258517	0.0202739	0.195907		Sertad2	Sertad2
Gna12	0.258203	0.037011	0.244975		Gna12	Gna12
Fbxo41	0.257555	0.0325022	0.232517		Fbxo41	Fbxo41
Clstn1	0.257393	0.0145824	0.169888		Clstn1	Clstn1
Crat	0.257345	0.00827413	0.133481		Crat	Crat
Rela	0.257031	0.029187	0.223803		Rela	Rela
Zfp574	0.256715	0.0281857	0.221836		Zfp574	Zfp574
Tnrc6b	0.256496	0.0103331	0.147529		Tnrc6b	Tnrc6b
Lnpep	0.256143	0.0201683	0.195217		Lnpep	Lnpep
Ube2o	0.256117	0.0428331	0.258882		Ube2o	Ube2o
Arntl	0.255716	0.0219309	0.202921		Arntl	Arntl
Rps6ka4	0.25571	0.015214	0.172333		Rps6ka4	Rps6ka4
Gbf1	0.255687	0.0278599	0.220576		Gbf1	Gbf1
Clip2	0.255595	0.0297712	0.22553		Clip2	Clip2
Cacna1c	0.255457	0.0338192	0.236716		Cacna1c	Cacna1c
Efr3a	0.255085	0.0390939	0.249514		Efr3a	Efr3a
Dip2a	0.254887	0.00523365	0.112641		Dip2a	Dip2a
Ago1	0.254584	0.00526656	0.112773		Ago1	Ago1
Sept3	0.254338	0.015731	0.173804		Sept3	Sept3
Mfsd4	0.254276	0.0313976	0.230003		Mfsd4	Mfsd4
Fgf12	0.253723	0.0220226	0.20321		Fgf12	Fgf12
Slc25a29	0.253588	0.0391251	0.249514		Slc25a29	Slc25a29
Acaca	0.253575	0.00869924	0.136025		Acaca	Acaca
Otud7b	0.253398	0.0265815	0.218857		Otud7b	Otud7b
Git2	0.253166	0.017551	0.184073		Git2	Git2
Dll1	0.253044	0.0292964	0.223889		Dll1	Dll1
Syt9	0.25294	0.0360596	0.242201		Syt9	Syt9
Asap2	0.252929	0.0495264	0.272943		Asap2	Asap2
Gnai1	0.252587	0.0208064	0.198815		Gnai1	Gnai1
Celf3	0.252219	0.0469923	0.266952		Celf3	Celf3
Pip4k2c	0.251859	0.00959637	0.140999		Pip4k2c	Pip4k2c
Bai3	0.25153	0.00860234	0.135692		Bai3	Bai3
Fam193a	0.251468	0.0493753	0.272621		Fam193a	Fam193a
Osbpl7	0.250892	0.0342532	0.23772		Osbpl7	Osbpl7
Herpud2	0.250678	0.0357416	0.241275		Herpud2	Herpud2
Igsf8	0.25032	0.00726839	0.126001		Igsf8	Igsf8
March9	0.24966	0.0427307	0.258882		March9	March9
Lrp3	0.248921	0.0228645	0.20672		Lrp3	Lrp3
Tbc1d25	0.248896	0.0174506	0.18394		Tbc1d25	Tbc1d25
Abcd4	0.248639	0.0436947	0.259882		Abcd4	Abcd4
Csmd1	0.248595	0.0179739	0.184869		Csmd1	Csmd1
Zfp704	0.248352	0.0310628	0.229415		Zfp704	Zfp704
Pgr	0.24788	0.0319888	0.231432		Pgr	Pgr
Rapgef1	0.247662	0.0149155	0.170694		Rapgef1	Rapgef1
Tanc2	0.247466	0.0370383	0.244975		Tanc2	Tanc2
Gga2	0.247459	0.037667	0.246854		Gga2	Gga2
Rims1	0.24732	0.039568	0.250283		Rims1	Rims1
Tmem62	0.247109	0.040672	0.252836		Tmem62	Tmem62
Vars2	0.246371	0.046488	0.265803		Vars2	Vars2
Rhobtb2	0.246345	0.0156926	0.173697		Rhobtb2	Rhobtb2
Abcb10	0.246186	0.00947711	0.140449		Abcb10	Abcb10
Vac14	0.245907	0.0100855	0.144918		Vac14	Vac14
Mphosph9	0.24587	0.0318422	0.231432		Mphosph9	Mphosph9
C2cd2	0.245327	0.00408082	0.099052		C2cd2	C2cd2
Kalrn	0.245205	0.0334657	0.23503		Kalrn	Kalrn
Abcd1	0.245063	0.0212047	0.20043		Abcd1	Abcd1
Fam168a	0.244852	0.0332521	0.234264		Fam168a	Fam168a
Tgfbrap1	0.244846	0.000967436	0.0539316		Tgfbrap1	Tgfbrap1
Matk	0.244816	0.0440279	0.260744		Matk	Matk
Cdk16	0.244612	0.0360041	0.242099		Cdk16	Cdk16
Dcx	0.24439	0.0103442	0.147531		Dcx	Dcx
Ankrd13d	0.244045	0.0310328	0.229332		Ankrd13d	Ankrd13d
Soga3	0.244025	0.0277093	0.22049		Soga3	Soga3
Sort1	0.243606	0.00888718	0.136769		Sort1	Sort1
Slc52a2	0.243173	0.0294685	0.224693		Slc52a2	Slc52a2
Atp8a2	0.242666	0.041551	0.25568		Atp8a2	Atp8a2
Pnrc1	0.242441	0.0438071	0.260189		Pnrc1	Pnrc1
Frmd5	0.241753	0.0174562	0.18394		Frmd5	Frmd5
Agrn	0.241487	0.0144247	0.169106		Agrn	Agrn
Zbtb44	0.241431	0.0188455	0.190134		Zbtb44	Zbtb44
Slc38a7	0.241416	0.0242912	0.212816		Slc38a7	Slc38a7
3110057O12Rik	0.24129	0.0255205	0.214798		3110057O12Rik	3110057O12Rik
Xk	0.241113	0.0272446	0.219711		Xk	Xk
Lrrfip1	0.240941	0.0317474	0.23122		Lrrfip1	Lrrfip1
Rusc1	0.240215	0.0265	0.21869		Rusc1	Rusc1
Ano8	0.239701	0.0249132	0.213191		Ano8	Ano8
Magi2	0.239499	0.0241086	0.212672		Magi2	Magi2
Gsk3a	0.239475	0.00916008	0.139305		Gsk3a	Gsk3a
Dclk1	0.239276	0.00299377	0.087059		Dclk1	Dclk1
Stk39	0.238739	0.0492556	0.272355		Stk39	Stk39
Pdcd6ip	0.238575	0.0219607	0.203057		Pdcd6ip	Pdcd6ip
Plxna2	0.23857	0.0134755	0.163969		Plxna2	Plxna2
Msl1	0.238438	0.0298803	0.225539		Msl1	Msl1
Gucy1a2	0.238416	0.0199359	0.194792		Gucy1a2	Gucy1a2
Impdh1	0.238348	0.0481202	0.270284		Impdh1	Impdh1
Agpat1	0.237703	0.0365345	0.243352		Agpat1	Agpat1
Ppp2r5b	0.237058	0.0486856	0.271407		Ppp2r5b	Ppp2r5b
Ctnnbip1	0.237035	0.0296485	0.225171		Ctnnbip1	Ctnnbip1
Gpd1l	0.236918	0.0232042	0.20811		Gpd1l	Gpd1l
Ssbp3	0.236431	0.0342674	0.23772		Ssbp3	Ssbp3
Ptprs	0.236264	0.00411364	0.0994005		Ptprs	Ptprs
Wsb2	0.236217	0.00778729	0.130452		Wsb2	Wsb2
Nbea	0.235673	0.0450971	0.262626		Nbea	Nbea
Slc44a1	0.235272	0.0429663	0.258882		Slc44a1	Slc44a1
Gpr173	0.235104	0.0382881	0.248007		Gpr173	Gpr173
Atp11b	0.234896	0.0474274	0.267981		Atp11b	Atp11b
Rapgef2	0.234727	0.016445	0.178176		Rapgef2	Rapgef2
Trim8	0.234386	0.0286059	0.222408		Trim8	Trim8
Pabpc4	0.234171	0.0417128	0.255751		Pabpc4	Pabpc4
Ralgps1	0.23388	0.0154089	0.172947		Ralgps1	Ralgps1
Stmn2	0.233721	0.0422677	0.257653		Stmn2	Stmn2
Gm1673	0.232903	0.0401248	0.251591		Gm1673	Gm1673
Trappc9	0.232737	0.0486711	0.271407		Trappc9	Trappc9
Ctps2	0.232724	0.0269892	0.219351		Ctps2	Ctps2
Smoc1	0.232094	0.0455448	0.263407		Smoc1	Smoc1
Flii	0.231917	0.0343242	0.237827		Flii	Flii
Slc6a6	0.231412	0.0285387	0.222271		Slc6a6	Slc6a6
Slc6a17	0.230385	0.00801724	0.132119		Slc6a17	Slc6a17
Npc1	0.230299	0.0347222	0.238737		Npc1	Npc1
Shc3	0.229961	0.0356698	0.240937		Shc3	Shc3
Pfas	0.229606	0.00160126	0.0682301		Pfas	Pfas
Hpcal4	0.229454	0.0487832	0.271539		Hpcal4	Hpcal4
Slc25a23	0.22933	0.00960332	0.140999		Slc25a23	Slc25a23
Pak7	0.229218	0.0435085	0.259882		Pak7	Pak7
E130309F12Rik	0.229128	0.0351127	0.239462		E130309F12Rik	E130309F12Rik
N4bp1	0.229015	0.0440364	0.260744		N4bp1	N4bp1
Slmap	0.228657	0.0402375	0.251597		Slmap	Slmap
Bcl2	0.228648	0.019532	0.193719		Bcl2	Bcl2
Ppp2r2c	0.228583	0.00646363	0.120718		Ppp2r2c	Ppp2r2c
Lrrc4b	0.227719	0.00777596	0.130425		Lrrc4b	Lrrc4b
Kcnq2	0.227275	0.0350363	0.239462		Kcnq2	Kcnq2
Phactr1	0.227036	0.011416	0.153414		Phactr1	Phactr1
Urb2	0.226862	0.0480873	0.270284		Urb2	Urb2
Strip1	0.226646	0.0127936	0.160637		Strip1	Strip1
Ncoa2	0.226248	0.0370881	0.244975		Ncoa2	Ncoa2
Ncln	0.224934	0.0268159	0.218877		Ncln	Ncln
Ski	0.224715	0.0346768	0.238669		Ski	Ski
Map2k5	0.224655	0.0212776	0.200562		Map2k5	Map2k5
Dip2b	0.224629	0.00659927	0.121955		Dip2b	Dip2b
Stk40	0.223712	0.0388129	0.249093		Stk40	Stk40
Dst	0.223668	0.0470771	0.267208		Dst	Dst
Aars2	0.222975	0.0248176	0.213144		Aars2	Aars2
Ube2s	0.222813	0.0300236	0.22585		Ube2s	Ube2s
Hsd17b7	0.222749	0.0265169	0.218695		Hsd17b7	Hsd17b7
D130043K22Rik	0.222601	0.0298114	0.22553		D130043K22Rik	D130043K22Rik
Lmbrd1	0.22135	0.00541837	0.113561		Lmbrd1	Lmbrd1
Gclm	0.220241	0.0300753	0.225985		Gclm	Gclm
Lrp11	0.220239	0.0236252	0.210205		Lrp11	Lrp11
Rgmb	0.219885	0.0313026	0.229558		Rgmb	Rgmb
Dbn1	0.218805	0.0185932	0.188528		Dbn1	Dbn1
Sdc3	0.218703	0.0445994	0.261932		Sdc3	Sdc3
Kif1a	0.218691	0.0198014	0.194184		Kif1a	Kif1a
Rab4a	0.218335	0.0401827	0.251597		Rab4a	Rab4a
Rb1	0.21802	0.0386465	0.248905		Rb1	Rb1
Uckl1	0.217542	0.0246955	0.212907		Uckl1	Uckl1
Prkce	0.217337	0.0101567	0.14563		Prkce	Prkce
Fut8	0.216982	0.0246069	0.212816		Fut8	Fut8
Camk1d	0.216142	0.0291807	0.223803		Camk1d	Camk1d
Fam169a	0.216052	0.0317917	0.231376		Fam169a	Fam169a
Sema4b	0.216011	0.0143816	0.168991		Sema4b	Sema4b
Hk1	0.2152	0.0441066	0.26092		Hk1	Hk1
Smug1	0.215088	0.0306892	0.228391		Smug1	Smug1
Arfgef1	0.215055	0.0201337	0.195217		Arfgef1	Arfgef1
Spire1	0.214042	0.00860508	0.135692		Spire1	Spire1
Lrfn5	0.213703	0.0461366	0.265165		Lrfn5	Lrfn5
Ppp2r5e	0.21349	0.0355669	0.240937		Ppp2r5e	Ppp2r5e
D830031N03Rik	0.212414	0.0370807	0.244975		D830031N03Rik	D830031N03Rik
4933426M11Rik	0.211637	0.0109461	0.151829		4933426M11Rik	4933426M11Rik
Nsmf	0.211077	0.027556	0.220025		Nsmf	Nsmf
Fmnl2	0.210662	0.0371343	0.245059		Fmnl2	Fmnl2
Zfp318	0.209706	0.0351422	0.239486		Zfp318	Zfp318
Socs7	0.209506	0.0402595	0.251597		Socs7	Socs7
Sppl3	0.209344	0.038709	0.249068		Sppl3	Sppl3
Ccdc149	0.209245	0.0420639	0.256818		Ccdc149	Ccdc149
Pcdha9	0.208895	0.0455786	0.263489		Pcdha9	Pcdha9
Foxred2	0.208712	0.0392489	0.249554		Foxred2	Foxred2
Adap1	0.20827	0.0404185	0.251866		Adap1	Adap1
Map2k4	0.207041	0.0345387	0.238207		Map2k4	Map2k4
Pgs1	0.20668	0.0196606	0.193786		Pgs1	Pgs1
Lrrc8a	0.206555	0.0257085	0.215198		Lrrc8a	Lrrc8a
Pak3	0.205894	0.0254623	0.214695		Pak3	Pak3
Dhx33	0.204901	0.00221234	0.0778084		Dhx33	Dhx33
Ubl7	0.204883	0.0323501	0.232171		Ubl7	Ubl7
Unc13b	0.204826	0.0208649	0.198821		Unc13b	Unc13b
Tada2b	0.204611	0.0289242	0.223803		Tada2b	Tada2b
Atg9a	0.204587	0.0342911	0.23772		Atg9a	Atg9a
Zfp236	0.204405	0.0350242	0.239462		Zfp236	Zfp236
Pde9a	0.204398	0.0401497	0.251591		Pde9a	Pde9a
Rnf123	0.203891	0.0319658	0.231432		Rnf123	Rnf123
Ide	0.20196	0.0383208	0.248007		Ide	Ide
Med9	0.201885	0.0324876	0.232517		Med9	Med9
Camk2b	0.201109	0.0244471	0.212816		Camk2b	Camk2b
Gab2	0.200811	0.0492172	0.272355		Gab2	Gab2
Evi5l	0.20002	0.0235991	0.210205		Evi5l	Evi5l
Khnyn	0.199906	0.0415884	0.25568		Khnyn	Khnyn
Bace1	0.199712	0.023152	0.20792		Bace1	Bace1
Arhgap20	0.19951	0.0356537	0.240937		Arhgap20	Arhgap20
Wdr6	0.198747	0.0198333	0.194354		Wdr6	Wdr6
Elavl3	0.198735	0.0295724	0.224937		Elavl3	Elavl3
Ints3	0.198724	0.0414602	0.255396		Ints3	Ints3
Lrrc58	0.197585	0.0316647	0.230953		Lrrc58	Lrrc58
Mtss1	0.196876	0.0312225	0.229415		Mtss1	Mtss1
Rnf214	0.196092	0.0491438	0.272355		Rnf214	Rnf214
Chka	0.196013	0.0323328	0.232171		Chka	Chka
Atp2a2	0.193161	0.0416775	0.255701		Atp2a2	Atp2a2
Zfp316	0.192868	0.0339442	0.236904		Zfp316	Zfp316
Dnajb14	0.191947	0.0472877	0.267962		Dnajb14	Dnajb14
Marcksl1	0.191809	0.0483332	0.270451		Marcksl1	Marcksl1
Tecpr2	0.191747	0.0130602	0.162017		Tecpr2	Tecpr2
4930402H24Rik	0.190746	0.028935	0.223803		4930402H24Rik	4930402H24Rik
Wdr41	0.190634	0.0372925	0.24536		Wdr41	Wdr41
Grip1	0.19015	0.0154022	0.172947		Grip1	Grip1
Kmt2c	0.190062	0.0368736	0.24452		Kmt2c	Kmt2c
Fam13b	0.190053	0.0489612	0.272041		Fam13b	Fam13b
Slc7a1	0.190013	0.03758	0.246527		Slc7a1	Slc7a1
Megf9	0.18945	0.0283292	0.221925		Megf9	Megf9
Rad54l2	0.189434	0.0366394	0.243809		Rad54l2	Rad54l2
Tmem245	0.188877	0.0452081	0.262795		Tmem245	Tmem245
Phyhipl	0.18812	0.0396298	0.250283		Phyhipl	Phyhipl
Nucb1	0.187882	0.0321663	0.231961		Nucb1	Nucb1
Alkbh5	0.187588	0.041681	0.255701		Alkbh5	Alkbh5
Heca	0.187587	0.0302306	0.226209		Heca	Heca
Pdpr	0.186305	0.0491785	0.272355		Pdpr	Pdpr
Slc6a15	0.183291	0.0469369	0.26675		Slc6a15	Slc6a15
Vps37a	0.18223	0.032052	0.231581		Vps37a	Vps37a
Rtn4	0.18162	0.0179118	0.184858		Rtn4	Rtn4
Prpsap1	0.181383	0.0457339	0.264046		Prpsap1	Prpsap1
Ank2	0.180716	0.0167713	0.179689		Ank2	Ank2
Ywhag	0.180477	0.00760764	0.129051		Ywhag	Ywhag
Dmxl2	0.179913	0.0201346	0.195217		Dmxl2	Dmxl2
Scg3	0.179817	0.00594587	0.11733		Scg3	Scg3
Zfp868	0.179431	0.0278138	0.220576		Zfp868	Zfp868
Tmem56	0.17786	0.0256691	0.215198		Tmem56	Tmem56
Gnas	0.17753	0.0273757	0.219711		Gnas	Gnas
Iars	0.176789	0.0474327	0.267981		Iars	Iars
Nup133	0.176688	0.039489	0.250278		Nup133	Nup133
Sc5d	0.176658	0.0430691	0.259129		Sc5d	Sc5d
Lrp8	0.175629	0.0429865	0.258882		Lrp8	Lrp8
Usp42	0.173044	0.0220676	0.20326		Usp42	Usp42
Mapkbp1	0.17242	0.0399532	0.251297		Mapkbp1	Mapkbp1
Rac1	0.171475	0.0224526	0.204919		Rac1	Rac1
Zdhhc3	0.171391	0.016553	0.178483		Zdhhc3	Zdhhc3
Ugcg	0.17087	0.0298411	0.22553		Ugcg	Ugcg
Amer2	0.170798	0.039624	0.250283		Amer2	Amer2
Mapk9	0.169883	0.0311364	0.229415		Mapk9	Mapk9
Ctc1	0.169326	0.0381174	0.247433		Ctc1	Ctc1
Mtor	0.169299	0.0134861	0.163969		Mtor	Mtor
Snap25	0.169273	0.0178739	0.184858		Snap25	Snap25
Fndc4	0.168421	0.046476	0.265803		Fndc4	Fndc4
Mmd	0.168386	0.0452869	0.262872		Mmd	Mmd
Ptpn9	0.16778	0.0397073	0.250283		Ptpn9	Ptpn9
March6	0.165483	0.04656	0.265976		March6	March6
Mtf1	0.16501	0.0367102	0.244159		Mtf1	Mtf1
Hcfc2	0.164969	0.0441985	0.26092		Hcfc2	Hcfc2
Tom1l2	0.164545	0.0164802	0.178306		Tom1l2	Tom1l2
Amer1	0.162735	0.0087047	0.136025		Amer1	Amer1
Arhgef4	0.161839	0.0371773	0.245131		Arhgef4	Arhgef4
Insr	0.160626	0.00927057	0.139401		Insr	Insr
Trappc10	0.160441	0.0164131	0.178176		Trappc10	Trappc10
Adcyap1r1	0.159632	0.0295181	0.224937		Adcyap1r1	Adcyap1r1
Herc2	0.158727	0.033617	0.235969		Herc2	Herc2
Myo5a	0.157574	0.034876	0.238939		Myo5a	Myo5a
Gpaa1	0.156695	0.0423174	0.257754		Gpaa1	Gpaa1
Clasp1	0.156649	0.0430216	0.258958		Clasp1	Clasp1
Tmod2	0.156605	0.0162142	0.176959		Tmod2	Tmod2
Vps13d	0.15521	0.0416316	0.25568		Vps13d	Vps13d
Mon2	0.154112	0.0341149	0.237479		Mon2	Mon2
A230046K03Rik	0.15259	0.0346462	0.238581		A230046K03Rik	A230046K03Rik
4931406P16Rik	0.150688	0.0494495	0.272835		4931406P16Rik	4931406P16Rik
Gns	0.147256	0.0323124	0.232149		Gns	Gns
Wdr26	0.14701	0.0365037	0.243352		Wdr26	Wdr26
Nploc4	0.144982	0.0474142	0.267981		Nploc4	Nploc4
Dgcr2	0.143999	0.030226	0.226209		Dgcr2	Dgcr2
Zfand5	0.142753	0.0276839	0.22049		Zfand5	Zfand5
Eri3	0.139658	0.034793	0.238891		Eri3	Eri3
Apba2	0.138989	0.0308392	0.228782		Apba2	Apba2
Rnpep	0.136272	0.0439186	0.260544		Rnpep	Rnpep
Yeats2	0.134007	0.0372028	0.245131		Yeats2	Yeats2
Scd2	0.132951	0.0452278	0.262795		Scd2	Scd2
Rab3gap2	0.130588	0.0479998	0.270162		Rab3gap2	Rab3gap2
Fads1	0.125959	0.0476019	0.268598		Fads1	Fads1
Large	0.122084	0.0312173	0.229415		Large	Large
Shprh	-0.120035	0.0495082	0.272943		Shprh
Calr	-0.1213	0.0458835	0.264568		Calr
Papola	-0.123074	0.0188806	0.190293		Papola
Arpp19	-0.126496	0.0481825	0.270285		Arpp19
Sf3b3	-0.128712	0.0243681	0.212816		Sf3b3
Snrnp70	-0.129569	0.0298331	0.22553		Snrnp70
Zbtb33	-0.130637	0.0428771	0.258882		Zbtb33
Kpna1	-0.130911	0.0418337	0.256053		Kpna1
Tspyl1	-0.131226	0.0483066	0.270451		Tspyl1
Wdr48	-0.132273	0.0473779	0.267981		Wdr48
Ncbp1	-0.13289	0.0468859	0.266574		Ncbp1
Cttn	-0.133882	0.0380238	0.247055		Cttn
March7	-0.134122	0.0481622	0.270284		March7
Son	-0.137193	0.0243256	0.212816		Son
Spin1	-0.138232	0.0447439	0.261932		Spin1
Hspa9	-0.139127	0.0475199	0.268248		Hspa9
Sdha	-0.139381	0.0361613	0.242264		Sdha
Srsf1	-0.140114	0.0270515	0.219467		Srsf1
Bclaf1	-0.143617	0.0417272	0.255751		Bclaf1
Tro	-0.143966	0.0368242	0.244313		Tro
Fbxl5	-0.144048	0.0435207	0.259882		Fbxl5
Dmtf1	-0.144596	0.0394902	0.250278		Dmtf1
Fhl1	-0.145093	0.0331575	0.233843		Fhl1
Nxf1	-0.146893	0.0429458	0.258882		Nxf1
Rnf4	-0.146938	0.0493638	0.272621		Rnf4
Tardbp	-0.147249	0.0118047	0.155334		Tardbp
Pgrmc1	-0.148358	0.0442942	0.26112		Pgrmc1
Arfgap2	-0.148541	0.0341713	0.237625		Arfgap2
Nfx1	-0.150579	0.035171	0.239486		Nfx1
Rbl2	-0.151448	0.0420287	0.256818		Rbl2
Pin1	-0.152322	0.0464332	0.265803		Pin1
Gmps	-0.15313	0.0197078	0.193832		Gmps
Ebna1bp2	-0.1542	0.0461575	0.265165		Ebna1bp2
Ik	-0.154267	0.0249604	0.213222		Ik
U2surp	-0.155088	0.0356492	0.240937		U2surp
Orc6	-0.156081	0.0431006	0.259202		Orc6
Pcmtd2	-0.156151	0.0303219	0.226697		Pcmtd2
Fkbp4	-0.156417	0.031956	0.231432		Fkbp4
Cuedc2	-0.156694	0.0417645	0.255801		Cuedc2
Aamp	-0.158603	0.0368218	0.244313		Aamp
Commd3	-0.159191	0.0391665	0.249514		Commd3
Mtus1	-0.15988	0.0467149	0.266298		Mtus1
Sf3b1	-0.160448	0.0420363	0.256818		Sf3b1
Eif3g	-0.161137	0.0395969	0.250283		Eif3g
Lsg1	-0.161472	0.0474154	0.267981		Lsg1
Dhx15	-0.162314	0.0135257	0.164153		Dhx15
Pick1	-0.162782	0.0390592	0.249514		Pick1
Metap2	-0.163747	0.0344975	0.238207		Metap2
Trmt1	-0.163787	0.0383701	0.248132		Trmt1
Idh2	-0.163948	0.0446186	0.261932		Idh2
Zfp266	-0.163949	0.0354197	0.240494		Zfp266
Aasdhppt	-0.164225	0.0493407	0.272621		Aasdhppt
Fsd1	-0.166009	0.0452041	0.262795		Fsd1
Mrto4	-0.16622	0.0463078	0.26576		Mrto4
Cnot2	-0.166661	0.0167718	0.179689		Cnot2
Armc10	-0.16668	0.014456	0.169184		Armc10
Cdk5	-0.167657	0.0410542	0.254294		Cdk5
Uba2	-0.167669	0.0164126	0.178176		Uba2
Ddx39b	-0.168213	0.0312113	0.229415		Ddx39b
Arhgef9	-0.168376	0.0423227	0.257754		Arhgef9
Nolc1	-0.168878	0.0229053	0.206844		Nolc1
Ift74	-0.168887	0.0492512	0.272355		Ift74
Mrpl11	-0.168954	0.0435729	0.259882		Mrpl11
Manf	-0.169117	0.039927	0.25125		Manf
Luc7l3	-0.169209	0.000491498	0.0423525		Luc7l3
Dad1	-0.169666	0.0362488	0.24239		Dad1
Stag2	-0.169965	0.0351876	0.239486		Stag2
Nedd4	-0.17028	0.0376002	0.246539		Nedd4
Nop56	-0.17037	0.0189361	0.190383		Nop56
Hspa5	-0.170642	0.0159517	0.175521		Hspa5
Dnajc10	-0.170647	0.048353	0.270451		Dnajc10
Fam216a	-0.170801	0.0298816	0.225539		Fam216a
Nhlrc2	-0.170888	0.0243998	0.212816		Nhlrc2
Cebpz	-0.171703	0.024968	0.213222		Cebpz
Cltb	-0.172558	0.0354857	0.240778		Cltb
Sf3b6	-0.172834	0.0449758	0.262034		Sf3b6
Wdr43	-0.173239	0.02111	0.200108		Wdr43
Sumo1	-0.173284	0.0424403	0.258294		Sumo1
Ssrp1	-0.173432	0.0141237	0.167478		Ssrp1
Pnisr	-0.17365	0.0433383	0.259793		Pnisr
Pdcl3	-0.174328	0.0433427	0.259793		Pdcl3
Cox7b	-0.174351	0.049709	0.272943		Cox7b
Matr3	-0.174361	0.0372417	0.245146		Matr3
Lrrc40	-0.174672	0.0268798	0.21908		Lrrc40
Stx5a	-0.174691	0.0197948	0.194184		Stx5a
Idh3b	-0.17576	0.0482421	0.270393		Idh3b
Ccnl1	-0.176042	0.0417735	0.255801		Ccnl1
Ndel1	-0.176118	0.037009	0.244975		Ndel1
Mtx1	-0.176272	0.0239385	0.211895		Mtx1
Clns1a	-0.176305	0.029593	0.224937		Clns1a
Nhp2l1	-0.176559	0.048387	0.270528		Nhp2l1
Haghl	-0.176909	0.029586	0.224937		Haghl
Zfp422	-0.177202	0.0403473	0.251597		Zfp422
Sgpp1	-0.177599	0.0281193	0.221584		Sgpp1
Rsl1d1	-0.177613	0.0336914	0.236153		Rsl1d1
G3bp1	-0.177746	0.0114844	0.153679		G3bp1
Phip	-0.17822	0.00674675	0.122562		Phip
Dock11	-0.178723	0.0380072	0.247055		Dock11
Slk	-0.179117	0.046793	0.266383		Slk
Cnot6	-0.179327	0.0429897	0.258882		Cnot6
Ccdc106	-0.179868	0.0441855	0.26092		Ccdc106
Ddx5	-0.180135	0.024674	0.212906		Ddx5
Msh2	-0.180196	0.0328591	0.232839		Msh2
Crbn	-0.180412	0.027419	0.219711		Crbn
Wbp4	-0.180515	0.0145039	0.16952		Wbp4
Atp5b	-0.181265	0.02581	0.2154		Atp5b
Arhgap12	-0.181677	0.0466028	0.265976		Arhgap12
Zfp955b	-0.182647	0.0267971	0.218857		Zfp955b
Tmem169	-0.182734	0.0372408	0.245146		Tmem169
Sdhb	-0.1829	0.0358619	0.241627		Sdhb
Akap1	-0.182923	0.0367612	0.244176		Akap1
Gadd45gip1	-0.183333	0.0442408	0.26092		Gadd45gip1
Ankmy2	-0.18338	0.0241614	0.212816		Ankmy2
Nub1	-0.183679	0.0406478	0.252825		Nub1
Dnajc7	-0.183683	0.0400068	0.251399		Dnajc7
Lig3	-0.183817	0.0278143	0.220576		Lig3
Prc1	-0.184122	0.0483444	0.270451		Prc1
Grb10	-0.184298	0.0491203	0.272355		Grb10
Trub2	-0.184304	0.0407858	0.252981		Trub2
Casd1	-0.184726	0.0220734	0.20326		Casd1
Chmp2a	-0.184748	0.0428635	0.258882		Chmp2a
Lyst	-0.185025	0.0454693	0.2633		Lyst
Txndc16	-0.185038	0.0239073	0.21187		Txndc16
Eif4a1	-0.185079	0.0302398	0.226209		Eif4a1
Dnajc8	-0.185937	0.0243532	0.212816		Dnajc8
Egfr	-0.186048	0.0290854	0.223803		Egfr
Emc3	-0.186416	0.0434343	0.259882		Emc3
Kars	-0.186713	0.0441672	0.26092		Kars
Slc25a5	-0.187268	0.0390527	0.249514		Slc25a5
Arf5	-0.187508	0.0130026	0.16175		Arf5
Psip1	-0.187621	0.0085836	0.135692		Psip1
Rad23a	-0.187961	0.0245499	0.212816		Rad23a
Fez1	-0.188147	0.021021	0.199447		Fez1
Ercc3	-0.188254	0.0257014	0.215198		Ercc3
Ppil4	-0.188621	0.0200618	0.19517		Ppil4
Hnrnpc	-0.188724	0.017717	0.184661		Hnrnpc
Golga7	-0.189051	0.0252985	0.214304		Golga7
Mrpl20	-0.189495	0.0179052	0.184858		Mrpl20
Cd2bp2	-0.189987	0.00617419	0.118163		Cd2bp2
Fnbp1l	-0.190148	0.0230976	0.207569		Fnbp1l
Fbxo25	-0.190521	0.0305187	0.22768		Fbxo25
Samm50	-0.190843	0.0244619	0.212816		Samm50
Cct5	-0.190904	0.0209544	0.198955		Cct5
Morn4	-0.191177	0.0356096	0.240937		Morn4
Cbx1	-0.191309	0.00580272	0.116357		Cbx1
Ccdc23	-0.191668	0.0441851	0.26092		Ccdc23
Nono	-0.191671	0.0162026	0.176959		Nono
Txnl4a	-0.191774	0.0253146	0.214305		Txnl4a
C1d	-0.191902	0.0422198	0.257477		C1d
Nfyb	-0.192458	0.0402396	0.251597		Nfyb
Scrn1	-0.192482	0.0283205	0.221925		Scrn1
Psma7	-0.192949	0.0344792	0.238207		Psma7
Cdkn2aipnl	-0.193178	0.0291287	0.223803		Cdkn2aipnl
Slc25a11	-0.193556	0.028355	0.221982		Slc25a11
Idh3g	-0.193678	0.0418759	0.256194		Idh3g
Hnrnpm	-0.193738	0.0325499	0.232572		Hnrnpm
Ndc1	-0.193952	0.0216705	0.20179		Ndc1
Eif3k	-0.194015	0.0211205	0.200108		Eif3k
Eef1b2	-0.194118	0.0458619	0.264557		Eef1b2
Lrwd1	-0.194296	0.0265783	0.218857		Lrwd1
Fam107b	-0.194688	0.00323275	0.0895505		Fam107b
Myg1	-0.19474	0.0425185	0.258361		Myg1
Rtcb	-0.19485	0.0274986	0.219907		Rtcb
Msi2	-0.194944	0.01895	0.190383		Msi2
1700037H04Rik	-0.195939	0.0200551	0.19517		1700037H04Rik
Slc7a6os	-0.196383	0.0416316	0.25568		Slc7a6os
1110004F10Rik	-0.196497	0.0476358	0.268676		1110004F10Rik
Birc2	-0.196676	0.0360732	0.242201		Birc2
Tpm4	-0.196707	0.0447134	0.261932		Tpm4
Zfp882	-0.196983	0.0156955	0.173697		Zfp882
Xpo1	-0.197198	0.0318314	0.231432		Xpo1
Prdx2	-0.197364	0.0262037	0.217851		Prdx2
Setd3	-0.19789	0.040048	0.251507		Setd3
Erp29	-0.197916	0.0298468	0.22553		Erp29
Tex9	-0.198242	0.0221481	0.20339		Tex9
Chchd4	-0.198248	0.0284904	0.222176		Chchd4
Tram1l1	-0.198262	0.0278942	0.220576		Tram1l1
Pcdhb17	-0.198318	0.0394663	0.250278		Pcdhb17
Pef1	-0.198617	0.042878	0.258882		Pef1
Hnrnpa2b1	-0.198665	0.026774	0.218857		Hnrnpa2b1
Aifm1	-0.199242	0.028579	0.222327		Aifm1
Agpat5	-0.199326	0.0213027	0.200562		Agpat5
Pbx2	-0.199377	0.029197	0.223803		Pbx2
Agk	-0.199516	0.0137181	0.165452		Agk
Smc4	-0.199726	0.0387885	0.249093		Smc4
Sox2	-0.200736	0.0357557	0.241275		Sox2
Pwp1	-0.200846	0.0150901	0.171374		Pwp1
Pdzd11	-0.200937	0.0464932	0.265803		Pdzd11
Txlng	-0.201401	0.0131896	0.162375		Txlng
Park7	-0.201891	0.0305694	0.227787		Park7
Polr2g	-0.201942	0.0274191	0.219711		Polr2g
Slc25a38	-0.202108	0.0291346	0.223803		Slc25a38
Chmp1a	-0.202311	0.0246295	0.212816		Chmp1a
Cpsf3	-0.202349	0.0403424	0.251597		Cpsf3
Toe1	-0.202639	0.0321599	0.231961		Toe1
Rpl10a	-0.202829	0.0292757	0.223889		Rpl10a
Arpc5	-0.20329	0.0186338	0.188713		Arpc5
Fam19a5	-0.203421	0.0470566	0.267205		Fam19a5
Prkd3	-0.20359	0.0106359	0.149158		Prkd3
Mrpl24	-0.203786	0.0452354	0.262795		Mrpl24
Mtmr7	-0.204032	0.0284934	0.222176		Mtmr7
Nudt2	-0.204296	0.0425769	0.258599		Nudt2
Sae1	-0.204425	0.00717655	0.125543		Sae1
Pramef8	-0.20447	0.0283695	0.221982		Pramef8
Sdr39u1	-0.204655	0.0383788	0.248132		Sdr39u1
Cops4	-0.204726	0.0150209	0.17117		Cops4
Zeb1	-0.204746	0.0412905	0.25492		Zeb1
Slx4ip	-0.204754	0.0341119	0.237479		Slx4ip
Fbxo18	-0.20484	0.0146566	0.169888		Fbxo18
Nup107	-0.204975	0.0266268	0.218857		Nup107
Ndufc1	-0.205241	0.0280163	0.221175		Ndufc1
Atp5k	-0.2055	0.0447804	0.262031		Atp5k
Tmem208	-0.205661	0.0327962	0.232572		Tmem208
Hax1	-0.205683	0.0446727	0.261932		Hax1
Sumo3	-0.205806	0.0114844	0.153679		Sumo3
Mrrf	-0.20592	0.0377424	0.246869		Mrrf
Paip2	-0.205998	0.0393319	0.249846		Paip2
Jrk	-0.206102	0.0377307	0.246869		Jrk
Ppp4c	-0.206502	0.0206866	0.198422		Ppp4c
Guk1	-0.206651	0.0345779	0.238286		Guk1
Rbbp7	-0.206684	0.0175835	0.184116		Rbbp7
Msto1	-0.206928	0.0330969	0.233843		Msto1
Rab30	-0.207001	0.0350973	0.239462		Rab30
Sumo2	-0.207041	0.0492517	0.272355		Sumo2
Pak1ip1	-0.207146	0.0435851	0.259882		Pak1ip1
Bzw2	-0.207316	0.00585927	0.116621		Bzw2
Nelfcd	-0.207469	0.0354252	0.240494		Nelfcd
Hip1r	-0.2078	0.0327977	0.232572		Hip1r
Cnot7	-0.207914	0.00471643	0.107097		Cnot7
Hnrnph1	-0.208046	0.0169359	0.180869		Hnrnph1
Fam214a	-0.208348	0.0463757	0.265803		Fam214a
Pkm	-0.208457	0.00725261	0.126001		Pkm
Fam136a	-0.208637	0.0156224	0.173697		Fam136a
Cdk4	-0.208677	0.0152515	0.172333		Cdk4
Slc35b2	-0.208776	0.031011	0.229297		Slc35b2
Rnf13	-0.208943	0.0136073	0.164697		Rnf13
Map1lc3b	-0.208946	0.0180663	0.185283		Map1lc3b
Zfp943	-0.208947	0.0443863	0.261319		Zfp943
Sp4	-0.209362	0.0301211	0.226076		Sp4
Ankrd45	-0.209376	0.0278632	0.220576		Ankrd45
Raly	-0.209658	0.0105032	0.148497		Raly
Tssc1	-0.209718	0.0218579	0.202525		Tssc1
Nsmce1	-0.209764	0.0303576	0.226772		Nsmce1
Cnbp	-0.209821	0.0325719	0.232572		Cnbp
Hook1	-0.210269	0.0262857	0.218127		Hook1
Rwdd1	-0.210304	0.027071	0.219493		Rwdd1
Psmd4	-0.210312	0.0179825	0.184869		Psmd4
Lcmt1	-0.21124	0.0227873	0.206438		Lcmt1
Mrpl19	-0.211691	0.0255522	0.214798		Mrpl19
Psma6	-0.212038	0.0384902	0.248494		Psma6
Rpl15	-0.212188	0.0203444	0.196253		Rpl15
Ddit4	-0.212391	0.0293569	0.224096		Ddit4
2210013O21Rik	-0.21251	0.0398877	0.251238		2210013O21Rik
Ska2	-0.212995	0.031099	0.229415		Ska2
Ndufa5	-0.213378	0.0447252	0.261932		Ndufa5
Bmi1	-0.213468	0.00274563	0.0834534		Bmi1
Pdcd4	-0.213716	0.0496622	0.272943		Pdcd4
Rpap3	-0.213861	0.0464094	0.265803		Rpap3
Mrps18c	-0.214081	0.0490796	0.272355		Mrps18c
H2afy	-0.214227	0.0172074	0.182752		H2afy
Snrnp40	-0.214423	0.0109939	0.151829		Snrnp40
Spcs2	-0.214445	0.00868682	0.136025		Spcs2
Atp11c	-0.214644	0.0472897	0.267962		Atp11c
Lsm14a	-0.214773	0.01831	0.186914		Lsm14a
1110038F14Rik	-0.214881	0.0333708	0.234753		1110038F14Rik
Ndufs4	-0.214961	0.0356281	0.240937		Ndufs4
Vta1	-0.215116	0.0212383	0.200517		Vta1
Wibg	-0.215361	0.0459238	0.264684		Wibg
Lta4h	-0.215476	0.0189102	0.190383		Lta4h
Rnf32	-0.215477	0.0427576	0.258882		Rnf32
Wsb1	-0.215648	0.0160433	0.176241		Wsb1
Atp5c1	-0.215815	0.014681	0.169888		Atp5c1
Atpif1	-0.215866	0.0217916	0.20205		Atpif1
Rpl21	-0.216446	0.0296777	0.225266		Rpl21
Rbm3	-0.216577	0.0146544	0.169888		Rbm3
Eif2a	-0.216776	0.0248698	0.213144		Eif2a
Blcap	-0.217111	0.0173999	0.183679		Blcap
Srl	-0.217154	0.0453348	0.262872		Srl
Kif11	-0.217204	0.0453065	0.262872		Kif11
2410015M20Rik	-0.217221	0.039535	0.250283		2410015M20Rik
Gpx4	-0.217252	0.0166844	0.17918		Gpx4
Atp5j	-0.217341	0.0267632	0.218857		Atp5j
Crebrf	-0.218451	0.0230905	0.207569		Crebrf
Phpt1	-0.218752	0.0317529	0.23122		Phpt1
Ssr4	-0.219172	0.0319537	0.231432		Ssr4
Tmem129	-0.21919	0.03913	0.249514		Tmem129
Tomm22	-0.21926	0.0189603	0.190383		Tomm22
Umps	-0.219327	0.0148079	0.170198		Umps
Fam204a	-0.219808	0.00751576	0.12814		Fam204a
Chd3os	-0.219869	0.0252393	0.214195		Chd3os
Ndufa7	-0.219898	0.0485591	0.271039		Ndufa7
Yeats4	-0.220256	0.0276601	0.22049		Yeats4
Rrm2	-0.220458	0.0248686	0.213144		Rrm2
Bex4	-0.220529	0.0159109	0.175216		Bex4
Hmces	-0.220551	0.0290643	0.223803		Hmces
Cdc123	-0.220676	0.00184915	0.0723058		Cdc123
Psmb6	-0.220884	0.0342646	0.23772		Psmb6
Sod1	-0.220966	0.00892152	0.137115		Sod1
Atp5h	-0.221618	0.0190462	0.190959		Atp5h
Mrps17	-0.221796	0.0134058	0.163734		Mrps17
Rnf180	-0.221797	0.0048104	0.107893		Rnf180
Myeov2	-0.221823	0.0244148	0.212816		Myeov2
2610524H06Rik	-0.22192	0.0179847	0.184869		2610524H06Rik
Xpo7	-0.222349	0.0019844	0.0750996		Xpo7
Ptma	-0.222751	0.0231738	0.207976		Ptma
Eif4a3	-0.222832	0.00964781	0.14135		Eif4a3
Serf2	-0.223048	0.0147844	0.170198		Serf2
Phb	-0.223173	0.0299799	0.22585		Phb
Ndufb8	-0.223306	0.0166784	0.17918		Ndufb8
Fam96b	-0.223311	0.0464128	0.265803		Fam96b
Cox6c	-0.223854	0.0234621	0.2097		Cox6c
Hmbs	-0.224241	0.0330784	0.233843		Hmbs
Zfp273	-0.224715	0.046886	0.266574		Zfp273
Commd9	-0.225091	0.0116616	0.154346		Commd9
Hist1h1e	-0.225101	0.047388	0.267981		Hist1h1e
Cetn3	-0.225203	0.0242444	0.212816		Cetn3
Mdk	-0.22571	0.0443186	0.261149		Mdk
Vldlr	-0.22641	0.0230696	0.207569		Vldlr
Gbas	-0.226544	0.0214829	0.201525		Gbas
Rpp25l	-0.22675	0.0322523	0.232149		Rpp25l
Tm2d2	-0.227057	0.00811827	0.132365		Tm2d2
Smpdl3a	-0.227169	0.0291651	0.223803		Smpdl3a
Ttc4	-0.22718	0.00637549	0.119797		Ttc4
Nup93	-0.227546	0.0179423	0.184858		Nup93
Eif2s2	-0.227565	0.00677063	0.122566		Eif2s2
Them4	-0.227946	0.0345104	0.238207		Them4
Rps26	-0.227968	0.0212564	0.200547		Rps26
Eif4b	-0.228019	0.0324888	0.232517		Eif4b
Bex2	-0.228288	0.013037	0.161878		Bex2
Syne2	-0.228309	0.0323016	0.232149		Syne2
Ddx6	-0.228315	0.00928651	0.139401		Ddx6
Mbd3	-0.228366	0.0246182	0.212816		Mbd3
Atp5j2	-0.228617	0.0307183	0.228391		Atp5j2
Cfdp1	-0.228686	0.012987	0.16175		Cfdp1
Igsf3	-0.229077	0.0123567	0.158239		Igsf3
Ing4	-0.229112	0.00168413	0.0696289		Ing4
Mettl21a	-0.229167	0.0449432	0.262034		Mettl21a
Ndufb5	-0.229692	0.049866	0.273502		Ndufb5
Pknox1	-0.229871	0.0145484	0.169816		Pknox1
Orc5	-0.229916	0.0185284	0.188232		Orc5
Pfdn5	-0.230809	0.0110443	0.151829		Pfdn5
Pvrl3	-0.230857	0.0271156	0.21956		Pvrl3
Dctn3	-0.231428	0.0224672	0.204919		Dctn3
Mrps16	-0.231438	0.0426596	0.258882		Mrps16
Btf3l4	-0.231528	0.0339325	0.236904		Btf3l4
Tmpo	-0.231639	0.00746431	0.127587		Tmpo
Arglu1	-0.231733	0.0116462	0.154346		Arglu1
Ppp1ca	-0.232035	0.00308324	0.0874367		Ppp1ca
B230118H07Rik	-0.232047	0.0381617	0.247563		B230118H07Rik
Npc2	-0.232366	0.0337332	0.236291		Npc2
Cenpe	-0.232537	0.0140258	0.16735		Cenpe
Wbp5	-0.232866	0.0446369	0.261932		Wbp5
Gtf2f1	-0.2329	0.0123377	0.158239		Gtf2f1
Zfp330	-0.233149	0.0029057	0.0858542		Zfp330
Aldh1l1	-0.233379	0.0193758	0.192968		Aldh1l1
Mrpl2	-0.233668	0.0330664	0.233843		Mrpl2
Rpl12	-0.233883	0.0091526	0.139305		Rpl12
Fpgs	-0.234048	0.0436973	0.259882		Fpgs
Denr	-0.234291	0.0175729	0.184116		Denr
Impdh2	-0.234624	0.00738641	0.127218		Impdh2
C330027C09Rik	-0.234787	0.0118562	0.155403		C330027C09Rik
Thumpd1	-0.234791	0.0164224	0.178176		Thumpd1
Pde2a	-0.234825	0.0112647	0.152674		Pde2a
Utrn	-0.234882	0.0285369	0.222271		Utrn
Enho	-0.234968	0.035602	0.240937		Enho
Dctpp1	-0.235624	0.0142156	0.168122		Dctpp1
Dnajc19	-0.236115	0.0178401	0.184858		Dnajc19
Crk	-0.236351	0.0250691	0.213357		Crk
Adarb2	-0.236452	0.0367521	0.244176		Adarb2
Mxi1	-0.237104	0.0194178	0.193243		Mxi1
Arhgap42	-0.237154	0.0278662	0.220576		Arhgap42
Arxes2	-0.237392	0.0119398	0.155762		Arxes2
Rraga	-0.237394	0.0322758	0.232149		Rraga
Hat1	-0.237405	0.028741	0.223328		Hat1
H3f3a	-0.237497	0.00625203	0.118638		H3f3a
Tmem231	-0.237532	0.0348757	0.238939		Tmem231
Dtnbp1	-0.238001	0.0267208	0.218857		Dtnbp1
Cirbp	-0.238236	0.0364189	0.243064		Cirbp
BC052040	-0.2383	0.0234441	0.2097		BC052040
Pfdn1	-0.238364	0.0144565	0.169184		Pfdn1
Zfp955a	-0.238591	0.0126796	0.160065		Zfp955a
Kin	-0.238706	0.0178503	0.184858		Kin
Glce	-0.238776	0.0209493	0.198955		Glce
Med11	-0.239138	0.0319569	0.231432		Med11
Pdk1	-0.239448	0.0225127	0.205056		Pdk1
Lrrc49	-0.239864	0.0209397	0.198955		Lrrc49
Mrps18a	-0.241045	0.00562727	0.115525		Mrps18a
Stk4	-0.24109	0.0392832	0.249655		Stk4
Hspe1	-0.241467	0.0318769	0.231432		Hspe1
Hist3h2a	-0.241497	0.0333144	0.23458		Hist3h2a
Rplp2	-0.241515	0.0175202	0.184038		Rplp2
Mphosph6	-0.241609	0.017665	0.184271		Mphosph6
Bckdha	-0.241943	0.0441245	0.26092		Bckdha
Fundc2	-0.242445	0.0291579	0.223803		Fundc2
Larp7	-0.24245	0.0194788	0.193707		Larp7
Pop7	-0.242825	0.0439567	0.260544		Pop7
Fastk	-0.242861	0.00140699	0.0658221		Fastk
Nusap1	-0.242921	0.0169616	0.181		Nusap1
Fut11	-0.242963	0.032742	0.232572		Fut11
AW209491	-0.243104	0.0121899	0.157321		AW209491
Nrsn1	-0.243486	0.0496904	0.272943		Nrsn1
Rpl18	-0.24352	0.019578	0.193719		Rpl18
Prelid1	-0.243653	0.00531475	0.112802		Prelid1
Cdc20	-0.243894	0.0251402	0.213771		Cdc20
1110004E09Rik	-0.243914	0.00743327	0.127218		1110004E09Rik
Ddx26b	-0.244376	0.00933414	0.139648		Ddx26b
U2af1	-0.244551	0.00258104	0.0817433		U2af1
Exosc7	-0.245205	0.0390974	0.249514		Exosc7
Ndufa13	-0.245462	0.0195136	0.193719		Ndufa13
Asrgl1	-0.245752	0.0403566	0.251597		Asrgl1
Gas2l3	-0.245953	0.0393678	0.249956		Gas2l3
Ngfrap1	-0.246009	0.00635829	0.119641		Ngfrap1
Ankrd6	-0.24679	0.0292018	0.223803		Ankrd6
Kctd18	-0.246818	0.00716779	0.125543		Kctd18
Lsm5	-0.247117	0.0219807	0.203103		Lsm5
Eef2	-0.247282	0.00905327	0.138689		Eef2
Atp6v1f	-0.247779	0.0153731	0.172835		Atp6v1f
Rpl22	-0.248175	0.00955281	0.140726		Rpl22
Acadm	-0.248181	0.0377938	0.246936		Acadm
Tma7	-0.248276	0.0401492	0.251591		Tma7
Nova1	-0.248326	0.0400614	0.251507		Nova1
1500009L16Rik	-0.248783	0.0131261	0.162336		1500009L16Rik
Clpp	-0.248896	0.021495	0.201525		Clpp
Cnpy2	-0.248969	0.0436409	0.259882		Cnpy2
Rpl38	-0.249022	0.0123585	0.158239		Rpl38
Rbmx	-0.249463	0.000278789	0.03212		Rbmx
Mcm5	-0.249858	0.0188506	0.190134		Mcm5
Entpd1	-0.250008	0.0242672	0.212816		Entpd1
Zfp618	-0.250193	0.0205	0.197008		Zfp618
Glrx5	-0.250238	0.019525	0.193719		Glrx5
AF357359	-0.250269	0.0109696	0.151829		AF357359
Nme3	-0.251652	0.00696702	0.124065		Nme3
Firre	-0.251779	0.0355029	0.240778		Firre
Rpa2	-0.251925	0.0421725	0.257306		Rpa2
Mis18a	-0.252059	0.038824	0.249093		Mis18a
Maf1	-0.25211	0.0107067	0.149674		Maf1
Rpl41	-0.252157	0.0147352	0.169956		Rpl41
Bola1	-0.252251	0.0385742	0.248797		Bola1
D8Ertd738e	-0.252867	0.0227306	0.206063		D8Ertd738e
Hist1h1a	-0.252952	0.0460383	0.265006		Hist1h1a
Npm1	-0.252996	0.00319962	0.0891567		Npm1
Mrpl46	-0.253582	0.0349203	0.23912		Mrpl46
Rps17	-0.25377	0.00285715	0.0852692		Rps17
Rpl27a	-0.254306	0.0179355	0.184858		Rpl27a
Cdc14a	-0.254368	0.0347486	0.238796		Cdc14a
Tmem258	-0.254461	0.0126042	0.160029		Tmem258
Usmg5	-0.254621	0.0285711	0.222327		Usmg5
Atp5g2	-0.254761	0.0062327	0.118565		Atp5g2
Tbca	-0.254815	0.0154998	0.173388		Tbca
Ruvbl2	-0.254938	0.00829267	0.133553		Ruvbl2
Rps24	-0.255183	0.00162709	0.0684228		Rps24
Fam184a	-0.255397	0.00992095	0.143725		Fam184a
Rpl36al	-0.255925	0.00941965	0.140303		Rpl36al
Zfp212	-0.256466	0.0167632	0.179689		Zfp212
Ndufaf3	-0.256505	0.0162885	0.177626		Ndufaf3
Apoa1bp	-0.25655	0.00576481	0.116117		Apoa1bp
Bloc1s5	-0.256713	0.0386398	0.248905		Bloc1s5
Fra10ac1	-0.257111	0.0277192	0.22049		Fra10ac1
Atp5g1	-0.257251	0.00211121	0.0768339		Atp5g1
Zfp709	-0.257286	0.0452434	0.262795		Zfp709
Ogfr	-0.257364	0.00462054	0.105815		Ogfr
Btg1	-0.257841	0.017045	0.181745		Btg1
Bex1	-0.257892	0.00640619	0.11996		Bex1
Pdcd2	-0.258141	0.00473654	0.107311		Pdcd2
Hist3h2ba	-0.258356	0.0268517	0.219036		Hist3h2ba
Polr1c	-0.258802	0.0439638	0.260544		Polr1c
Trnt1	-0.259115	0.0326368	0.232572		Trnt1
Tmem66	-0.259557	0.00594413	0.11733		Tmem66
2810021J22Rik	-0.259619	0.013157	0.162375		2810021J22Rik
Uqcr11	-0.259625	0.0131709	0.162375		Uqcr11
Tmem242	-0.259696	0.0480979	0.270284		Tmem242
Ndufa8	-0.259719	0.00569458	0.11568		Ndufa8
Nifk	-0.259804	0.00970905	0.142093		Nifk
Mak16	-0.259879	0.00773392	0.130175		Mak16
Naa10	-0.26068	0.00424377	0.100912		Naa10
Hsd17b10	-0.260797	0.0311432	0.229415		Hsd17b10
Insig2	-0.261101	0.0267972	0.218857		Insig2
Naga	-0.26119	0.0212102	0.20043		Naga
Rps4x	-0.261369	0.0122757	0.157973		Rps4x
Pole3	-0.261453	0.04686	0.266574		Pole3
Rps25	-0.261722	0.00916656	0.139305		Rps25
Rnf113a2	-0.261831	0.0334106	0.234765		Rnf113a2
Rps2	-0.261839	0.0252194	0.214195		Rps2
Chsy3	-0.261957	0.0379139	0.247044		Chsy3
Wdr55	-0.262034	0.00754883	0.128378		Wdr55
Plcl2	-0.262074	0.0238303	0.211466		Plcl2
Mis18bp1	-0.26226	0.0271447	0.21956		Mis18bp1
Racgap1	-0.262289	0.0110637	0.151829		Racgap1
Atp5sl	-0.262684	0.033882	0.236716		Atp5sl
Clu	-0.263095	0.0377804	0.246936		Clu
Tomm7	-0.263573	0.0263786	0.218255		Tomm7
Chchd3	-0.263699	0.00519013	0.111925		Chchd3
Ppip5k2	-0.264182	1.71298e-05	0.0072806		Ppip5k2
Syf2	-0.26431	0.0120604	0.156552		Syf2
Xpa	-0.264857	0.0299716	0.22585		Xpa
Supt4a	-0.265547	0.0221866	0.203444		Supt4a
Rpl27	-0.266788	0.0107717	0.15008		Rpl27
Ddx28	-0.266808	0.0187718	0.189766		Ddx28
Mgst3	-0.26729	0.0120885	0.1567		Mgst3
Hypk	-0.267566	0.0278938	0.220576		Hypk
Rpl19	-0.268008	0.00206795	0.0765368		Rpl19
Hace1	-0.268057	0.0248922	0.213146		Hace1
Igbp1	-0.268262	0.00672242	0.122379		Igbp1
Steap2	-0.268451	0.0411242	0.254356		Steap2
Cox4i1	-0.268513	0.011419	0.153414		Cox4i1
Inpp5f	-0.268526	0.0282243	0.221851		Inpp5f
Rplp1	-0.268603	0.0100637	0.14476		Rplp1
Nagk	-0.269157	0.00978093	0.142833		Nagk
Dhx40	-0.269165	0.0215918	0.20179		Dhx40
Fancb	-0.269354	0.0496795	0.272943		Fancb
Rps19	-0.269513	0.0170735	0.181905		Rps19
Rpl36	-0.26985	0.0141019	0.167377		Rpl36
Gorab	-0.270217	0.0110494	0.151829		Gorab
Lamtor3	-0.270354	0.0175962	0.184116		Lamtor3
Rpl23a	-0.271016	0.0111986	0.152674		Rpl23a
Dlgap5	-0.271449	0.0375673	0.246527		Dlgap5
Cyp2j6	-0.272185	0.0116247	0.154346		Cyp2j6
H2afz	-0.272262	0.005933	0.11733		H2afz
Slc7a2	-0.272495	0.0407806	0.252981		Slc7a2
Rpl17	-0.272825	0.00345425	0.0925663		Rpl17
Ccdc39	-0.272856	0.00988788	0.14346		Ccdc39
Mrpl40	-0.272916	0.0130206	0.161824		Mrpl40
Ect2	-0.272969	0.0457179	0.264046		Ect2
Fam64a	-0.273292	0.041307	0.25492		Fam64a
Ttc30a1	-0.273361	0.0327987	0.232572		Ttc30a1
Rpl4	-0.273793	0.00205414	0.0765368		Rpl4
Polr2j	-0.274672	0.0121712	0.15723		Polr2j
Rapgef6	-0.274732	0.0487153	0.271448		Rapgef6
Siva1	-0.274813	0.0161212	0.176663		Siva1
Anapc15	-0.274939	0.00615664	0.117995		Anapc15
Rpl8	-0.275253	0.00224351	0.0779866		Rpl8
Polr2h	-0.275357	0.0119415	0.155762		Polr2h
Mrpl22	-0.275495	0.0094922	0.140449		Mrpl22
2810008D09Rik	-0.275996	0.0160941	0.17651		2810008D09Rik
Tmem123	-0.276038	0.0152443	0.172333		Tmem123
Enpp5	-0.276057	0.0139893	0.167212		Enpp5
Rpl10	-0.276162	0.00360436	0.0949954		Rpl10
Rps6ka6	-0.276461	0.00599329	0.11733		Rps6ka6
Pxmp4	-0.27706	0.043924	0.260544		Pxmp4
Rps21	-0.277292	0.00836159	0.133592		Rps21
Naca	-0.277443	0.000758651	0.0508836		Naca
Srsf5	-0.277492	0.012765	0.160585		Srsf5
Eef1a1	-0.277509	0.00285263	0.0852692		Eef1a1
Nsa2	-0.278357	0.0124661	0.159052		Nsa2
Rpl32	-0.278549	0.00217395	0.0776784		Rpl32
Syt5	-0.279213	0.0126476	0.160065		Syt5
1810032O08Rik	-0.279296	0.0216835	0.20179		1810032O08Rik
Thbs3	-0.279426	0.0431618	0.259338		Thbs3
Rpgrip1l	-0.279482	0.00306593	0.0874367		Rpgrip1l
Hist1h1b	-0.279627	0.0173078	0.183049		Hist1h1b
Polr2e	-0.27976	0.00341878	0.0922068		Polr2e
Cdc26	-0.279981	0.0105114	0.148497		Cdc26
Zfyve19	-0.280207	0.0273037	0.219711		Zfyve19
Rnaseh2b	-0.280359	0.0389701	0.249514		Rnaseh2b
Rpl7a	-0.28072	0.0034262	0.0922068		Rpl7a
Polr2f	-0.281887	0.0176244	0.184131		Polr2f
Map2k1	-0.282442	0.00776894	0.130425		Map2k1
Ndufb10	-0.28253	0.00539308	0.113561		Ndufb10
Rpsa	-0.282712	0.0022298	0.0779866		Rpsa
Plek	-0.28288	0.0104275	0.14809		Plek
Rpl11	-0.283538	0.0139188	0.166635		Rpl11
Lsm7	-0.28401	0.0111498	0.152674		Lsm7
Eif3h	-0.284239	0.00213209	0.0770017		Eif3h
Nans	-0.284304	0.015191	0.172229		Nans
Mzt1	-0.28513	0.00677867	0.122566		Mzt1
1700021F05Rik	-0.285179	0.00653807	0.121661		1700021F05Rik
Rora	-0.285294	0.0378358	0.246936		Rora
Sec61g	-0.285306	0.0436385	0.259882		Sec61g
Top2a	-0.285408	0.0120339	0.156511		Top2a
Tmsb10	-0.285516	0.00169906	0.0697547		Tmsb10
Rpl6	-0.28633	0.00380215	0.0963641		Rpl6
Med10	-0.286439	0.00193145	0.0737187		Med10
Rpl18a	-0.28767	0.00328551	0.0904422		Rpl18a
Hist1h2bf	-0.287839	0.040699	0.252836		Hist1h2bf
Slc44a5	-0.287962	0.0253612	0.214429		Slc44a5
Rps5	-0.288194	0.00282704	0.0847795		Rps5
Cep63	-0.28822	0.0348702	0.238939		Cep63
Cntnap2	-0.288234	0.0282171	0.221851		Cntnap2
Snrpg	-0.288482	0.0222139	0.203444		Snrpg
Sft2d2	-0.288537	0.0321827	0.231961		Sft2d2
Bloc1s2	-0.289085	0.0309836	0.229221		Bloc1s2
Megf10	-0.289127	0.0361177	0.242264		Megf10
Ccnd2	-0.28918	0.0104654	0.148471		Ccnd2
Mrpl27	-0.289419	0.0327828	0.232572		Mrpl27
Ric8b	-0.289747	0.0112593	0.152674		Ric8b
Snhg5	-0.290308	0.0256624	0.215198		Snhg5
Trappc5	-0.290524	0.00126312	0.0612635		Trappc5
Rpl9	-0.290731	0.00571805	0.115696		Rpl9
Scml2	-0.29128	0.0195954	0.193719		Scml2
Apoe	-0.29134	0.0216149	0.20179		Apoe
Col9a3	-0.291394	0.00363461	0.0949954		Col9a3
Dhdh	-0.291505	0.0368969	0.244553		Dhdh
Ctnnbl1	-0.292474	0.00161147	0.0682301		Ctnnbl1
Vcl	-0.29305	0.0387704	0.249093		Vcl
Gtf2h4	-0.293169	0.0486824	0.271407		Gtf2h4
Rps18	-0.293231	0.00246892	0.0799511		Rps18
Cope	-0.293826	0.000983701	0.0546116		Cope
Acp1	-0.294118	0.0253572	0.214429		Acp1
2510009E07Rik	-0.294146	0.0237896	0.211385		2510009E07Rik
Rassf7	-0.295533	0.0427179	0.258882		Rassf7
2610301B20Rik	-0.295623	0.0237235	0.210937		2610301B20Rik
Eef1g	-0.295757	0.000237109	0.0308932		Eef1g
Eif1	-0.295951	0.0161397	0.176721		Eif1
Anp32a	-0.296085	0.00136867	0.0649114		Anp32a
Aste1	-0.296088	0.0177583	0.184858		Aste1
[truncated: 452 more rows]
